# Supplementary material for: Facile P,N-heterocycle synthesis via tandem aminomethylation–cyclization of H-phosphinate building blocks
Source: Royal Society of Chemistry journal article supplement (doi:10.1039/b917428a), 2009-11-05

## Supporting Information

Clémence Queffélec and Jean-Luc Montchamp\*

*Department of Chemistry, Box 298860, Texas Christian University, Fort Worth, Texas  
76129*

### LIST OF CONTENTS:

|                                                                           | PAGE |
|---------------------------------------------------------------------------|------|
| 1. General Chemistry                                                      | 2    |
| 2. Reagents and Solvents                                                  | 2    |
| 3. <sup>31</sup> P NMR Yield Measurements                                 | 2    |
| 4. (3-chloropropyl)phosphinic acid (Scheme 2, compound 6)                 | 3    |
| 5. Solution of EtOP(O)H <sub>2</sub>                                      | 3    |
| 6. 2-bromophenylphosphinic acid (Scheme 3)                                | 3    |
| 7. Ethyl (1,1-diethoxy-ethyl)-(2-bromobenzyl)phosphinate (Scheme 4)       | 4    |
| 8. Cinnamyl- <i>H</i> -phosphinic acid (Scheme 5)                         | 4    |
| 9. Ethyl cinnamyl- <i>H</i> -phosphinate (Scheme 5)                       | 4    |
| 10. Iodide Heck precursor (Scheme 5)                                      | 4    |
| 11. Ethyl allyl- <i>H</i> -phosphinate (Scheme 6)                         | 5    |
| 12. Ethyl allyl- <i>N</i> -benzyl(aminomethyl)phosphinate (Scheme 6)      | 5    |
| 13. Ethyl (( <i>N</i> -benzyl)aminomethyl)-cinnamylphosphinate (Scheme 6) | 6    |
| 14. Cyclization attempt from compound <b>12a</b>                          | 6    |
| 15. References                                                            | 7    |
| 16. Spectra                                                               | 8    |

**1. General Chemistry.** All reactions were conducted in oven- or flame-dried glassware, under nitrogen.  $^1\text{H}$  NMR spectra were recorded on a 300-MHz spectrometer. Chemical shifts for  $^1\text{H}$  NMR spectra are reported (in parts per million) relative to internal tetramethylsilane ( $\text{Me}_4\text{Si}$ ,  $\delta = 0.00$  ppm) with  $\text{CDCl}_3$  as solvent.  $^{13}\text{C}$  NMR spectra were recorded at 75 MHz. Chemical shifts for  $^{13}\text{C}$  NMR spectra are reported (in parts per million) relative to  $\text{CDCl}_3$  ( $\delta = 77.0$  ppm).  $^{31}\text{P}$  NMR spectra were recorded at 121 MHz (300 MHz spectrometer) and/or 36 MHz (90 MHz spectrometer), and chemical shifts reported (in parts per million) relative to external 85% phosphoric acid ( $\delta = 0.0$  ppm). Radial chromatography was carried out using 2 or 4 mm layers of silica gel 60 PF<sub>254</sub> containing gypsum. Silica gel (200-300 mesh) was used for flash chromatography. Ethyl acetate/hexanes mixtures were used as the eluent for chromatographic purifications. TLC plates were visualized by immersion in anisaldehyde stain (by volume: 93% ethanol, 3.5% sulfuric acid, 1% acetic acid, and 2.5% anisaldehyde) followed by heating. Organic solutions of products were dried over anhydrous  $\text{MgSO}_4$ .

**2. Reagents and Solvents.** Stock solution (0.5 M) of concentrated  $\text{EtOP(O)H}_2$  in reagent grade  $\text{CH}_3\text{CN}$  were also prepared and used for one month without any decomposition of the acid. Unless otherwise specified, HPLC or reagent grade solvents were used as received. Anhydrous toluene were distilled under  $\text{N}_2$  from  $\text{CaH}_2$ , anhydrous THF under  $\text{N}_2$  from sodium benzophenone ketyl, and used immediately.  $i\text{Pr}_2\text{NEt}$  was distilled under  $\text{N}_2$  from  $\text{CaH}_2$  and stored over activated 4Å molecular sieves.

**3.  $^{31}\text{P}$  NMR Yield Measurements.** The NMR yields are determined by integration of all the resonances in the  $^{31}\text{P}$  NMR spectra, an approach which is valid if no phosphorus-containing gas (ie.  $\text{PH}_3$ ) evolves, or if the precipitate in a heterogeneous mixture does not contain phosphorus. The yields determined by NMR are generally accurate within ~10% of the value indicated, and are reproducible. Isolated yields are sometimes significantly lower because of the *H*-phosphinate esters are polar compounds and hydrolytically labile.

**(3-Chloropropyl)-*H*-phosphinic acid (Scheme 2, compound 6).**<sup>1</sup> The preparation of this compound was conducted as described in the literature.

**EtOP(O)H<sub>2</sub>.** The preparation of this compound was conducted as described in the literature.<sup>2</sup> In a typical procedure, a solution of the hypophosphorous compound (10 mmol), alkoxy silane ((EtO)<sub>2</sub>SiMe<sub>2</sub>, 15 mmol), in reagent grade solvent (10 mL) was refluxed for 2 h under N<sub>2</sub>. After cooling to room temperature, the mixture was used directly.

**2-Bromophenyl-*H*-phosphinic acid (Scheme 3).**<sup>3</sup> The preparation of this compound was conducted as described in the literature.

**Ethyl 2-bromophenyl-*H*-phosphinate (Scheme 3, compound 3).** To the 2-bromophenyl-*H*-phosphinic acid (4.42 g, 20 mmol) in toluene (70 mL) was added tetraethyl orthosilicate (1.5 equiv, 6.25 g) under N<sub>2</sub> and the mixture was refluxed for 24 h. The solvent was removed by vacuo and the resulting oil was purified by column chromatography (silica, EtOAc/Hexanes 3:7, v/v) to afford the desired product as a yellow oil (3.2 g, 64%): <sup>1</sup>H NMR (CDCl<sub>3</sub>, 300 MHz) δ 7.90-8.05 (m, 1H, *aro* CH), 7.66 (d, J = 589 Hz, 1H, H-P), 7.60-7.65 (m, 1H, *aro* CH), 7.40-7.60 (m, 2H, *aro* CH), 4.00-4.30 (m, 2H, -CH<sub>2</sub>-O), 1.39 (t, J = 7 Hz, 3H, CH<sub>3</sub>-); <sup>13</sup>C NMR (CDCl<sub>3</sub>, 75.45 MHz) δ 134.9 (d, J = 8 Hz), 134.5 (d, J = 2 Hz), 133.7 (d, J = 8 Hz), 130.0 (d, J = 136 Hz), 127.6 (d, J = 12 Hz), 125.0 (d, J = 8 Hz), 62.9 (d, J<sub>POC</sub> = 6 Hz), 16.5 (d, J<sub>POCC</sub> = 6 Hz); <sup>31</sup>P NMR (CDCl<sub>3</sub>, 121.47 MHz) δ 23.3 (d, J = 589 Hz); HRMS (EI<sup>+</sup>) calc for C<sub>8</sub>H<sub>10</sub>BrO<sub>2</sub>P 247.9602, found 247.9600.

**Ethyl (1,1-diethoxyethyl)-(2-bromobenzyl)phosphinate (Scheme 4).**<sup>4</sup> Neat Ciba-Geigy reagent ethyl (1,1-diethoxyethyl)-*H*-phosphinate (20 mmol, 4.2 g) was placed under vacuum in a dry two-neck flask. Anhydrous THF (70 mL) was then added under nitrogen. The flask was placed at -78 °C and deoxygenated under vacuum for 20 min. The reaction flask was back-filled with nitrogen, LiHMDS (1.0 M in THF, 20 mmol, 20 mL) was added at -78 °C. After 10 min, 2-bromobenzyl bromide (1 equiv, 20 mmol, 5 g).

After addition, the temperature of the solution was slowly allowed to warm to rt. After 3 h at rt, the reaction mixture was quenched with NH<sub>4</sub>Cl/brine, extracted with EtOAc (3 x 20 mL), dried and concentrated. The resulting oil was purified by column chromatography (silica, EtOAc/Hexanes 30:70, v/v) to afford the desired product (61%): <sup>1</sup>H NMR (CDCl<sub>3</sub>, 300 MHz) δ 7.54 (t, J = 8 Hz, 2H, *aro* CH), 7.20-7.30 (m, 1H, *aro* CH), 7.00-7.15 (m, 1H, *aro* CH), 3.95-4.15 (m, 2H, -CH<sub>2</sub>-O-), 3.80-3.90 (m, 1H, -CH<sub>2</sub>-O-), 3.60-3.75 (m, 3H, -CH<sub>2</sub>-O-), 3.30-3.55 (m, 2H, C-CH<sub>2</sub>-P), 1.56 (d, J = 11 Hz, 3H, CH<sub>3</sub>-C-P-), 1.10-1.30 (m, 9H, CH<sub>3</sub>-); <sup>13</sup>C NMR (CDCl<sub>3</sub>, 75.45 MHz) δ 133.0 (d, J = 2 Hz), 132.3 (d, J = 4 Hz), 131.9 (d, J = 9 Hz), 128.5 (d, J = 3 Hz), 127.5 (d, J = 3 Hz), 125.4 (d, J = 7 Hz), 101.5 (d, J<sub>PC</sub> = 142 Hz), 62.1 (d, J<sub>POC</sub> = 7 Hz), 58.6 (d, J<sub>PCOC</sub> = 5 Hz), 57.9 (d, J<sub>PCOC</sub> = 7 Hz), 33.3 (d, J<sub>PC</sub> = 80 Hz), 29.9, 20.6 (d, J<sub>POCCC</sub> = 12 Hz), 16.7 (d, J<sub>POCC</sub> = 5 Hz), 15.6 (d, J<sub>PCOCC</sub> = 21 Hz); <sup>31</sup>P NMR (CDCl<sub>3</sub>, 121.47 MHz) δ 44.4 (s); HRMS (EI<sup>+</sup>) calc for C<sub>15</sub>H<sub>24</sub>BrO<sub>4</sub>P 379.0674, found 379.0654.

**Cinnamyl-*H*-phosphinic acid (Scheme 5, compound 7).**<sup>5</sup> The preparation of this compound was conducted as described in the literature.

**Ethyl cinnamyl-*H*-phosphinate (Scheme 5, compound 8).** To the cinnamyl-*H*-phosphinic acid (23.6 g, 130 mmol) in toluene (430 mL) was added tetraethyl orthosilicate (1.5 equiv, 40.6 g) under N<sub>2</sub> and the mixture was refluxed for 24 h. The solvent was removed by vacuo and the resulting oil was purified by column chromatography (silica, EtOAc/Hexanes 3:7, v/v) to afford the desired product as a yellow oil (25.1 g, 92%): <sup>1</sup>H NMR (CDCl<sub>3</sub>, 300 MHz) δ 7.20-7.40 (m, 5H, *aro* CH), 7.04 (d, J = 545 Hz, 1H, H-P), 6.53 (dd, J = 15, 6 Hz, 1H, -CH=CH-), 6.00-6.20 (m, 1H, -CH=CH-), 4.00-4.30 (m, 2H, -CH<sub>2</sub>-O-), 2.79 (dd, J = 18, 8 Hz, 2H, -CH<sub>2</sub>-P), 1.36 (t, J = 14, 7 Hz, 3H, CH<sub>3</sub>-); <sup>13</sup>C NMR (CDCl<sub>3</sub>, 75.45 MHz) δ 136.6 (d, J = 4 Hz), 136.1 (d, J = 14 Hz), 128.8 (2C), 128.0, 126.4 (2C, d, J = 2 Hz), 116.9 (d, J = 10 Hz), 62.8 (d, J<sub>POC</sub> = 7 Hz), 34.2 (d, J<sub>PC</sub> = 90 Hz), 16.5 (d, J<sub>POCC</sub> = 6 Hz); <sup>31</sup>P NMR (CDCl<sub>3</sub>, 121.47 MHz) δ 36.7 (d, J = 544 Hz); HRMS (EI<sup>+</sup>) calc for C<sub>11</sub>H<sub>15</sub>O<sub>2</sub>P 210.0810, found 210.0805.

**Iodide Heck precursor (Scheme 5, compound 9).** Ethyl cinnamyl-*H*-phosphinate (8

mmol, 1.68 g), 2-iodoaniline (1.2 equiv, 9.6 mmol, 2.1 g) and paraformaldehyde (1.2 equiv, 9.6 mmol, 317.1 mg) in toluene (40 mL) were refluxed for 16 h. After cooling to room temperature, the mixture was concentrated and the resulting oil was diluted in EtOAc (60 mL) and washed with brine (1 x 20 mL). The organic layer was dried and concentrated. The resulting oil was purified by column chromatography (silica, EtOAc/Hexanes 6:4, v/v) to afford the desired product as a yellow oil (1.6 g, 46%):  $^1\text{H}$  NMR ( $\text{CDCl}_3$ , 300 MHz)  $\delta$  7.66 (d,  $J = 8$  Hz, 1H, *aro* CH), 7.15-7.35 (m, 6H, *aro* CH), 6.40-6.65 (m, 3H, *aro* CH and -CH=CH-), 6.10-6.30 (m, 1H, -CH=CH-), 4.40-4.55 (m, 1H, -NH-), 4.15-4.30 (m, 2H, -CH<sub>2</sub>-O-), 3.40-3.65 (m, 2H, -N-CH<sub>2</sub>-P), 2.88 (dd,  $J = 18, 7$  Hz, 2H, -CH<sub>2</sub>-P), 1.38 (t,  $J = 14, 7$  Hz, 3H, CH<sub>3</sub>-);  $^{13}\text{C}$  NMR ( $\text{CDCl}_3$ , 75.45 MHz)  $\delta$  146.7 (d,  $J = 9$  Hz), 139.4, 136.7 (d,  $J = 3$  Hz), 135.7 ( $J = 13$  Hz), 129.7, 128.8, 128.0, 126.5 (d,  $J = 2$  Hz), 120.2 (2C), 118.2 (d,  $J = 9$  Hz), 111.4 (2C), 86.2, 61.8 (d,  $J_{\text{POC}} = 7$  Hz), 41.6 (d,  $J_{\text{PC}} = 100$  Hz), 32.8 (d,  $J_{\text{PC}} = 89$  Hz), 17.0 (d,  $J_{\text{POCC}} = 5$  Hz);  $^{31}\text{P}$  NMR ( $\text{CDCl}_3$ , 121.47 MHz)  $\delta$  48.7 (s); HRMS ( $\text{EI}^+$ ) calc for  $\text{C}_{18}\text{H}_{21}\text{INO}_2\text{P}$  441.0355, found 441.0355.

**Ethyl allyl-*H*-phosphinate (Scheme 6, compound 11).**<sup>6</sup> The preparation of this compound was conducted as described in the literature.

**Ethyl allyl-*N*-benzyl(aminomethyl)phosphinate (Scheme 6, compound 12a).** To compound **11** (12.5 mmol) in toluene (60 mL) was added 1,3,5-tribenzylhexahydro-1,3,5-triazine (0.4 equiv, 15 mmol, 2.72 g). After 16 h of reflux, the mixture was concentrated and the resulting oil was diluted in EtOAc (60 mL) and washed with brine (1 x 20 mL). The organic layer was dried and concentrated. The resulting oil was purified by column chromatography (silica, EtOAc/Hexanes 3:7, v/v) to afford the desired product as a yellow oil (2.36 g, 57%):  $^1\text{H}$  NMR ( $\text{CDCl}_3$ , 300 MHz)  $\delta$  7.20-7.40 (m, 5H, *aro* CH), 5.60-5.85 (m, 1H, -CH=), 5.05-5.20 (m, 2H, CH<sub>2</sub>=), 4.00-4.25 (m, 2H, -CH<sub>2</sub>-O-), 3.82 (s, 2H, -CH<sub>2</sub>-Ph), (d,  $J = \text{Hz}$ , 2H, -P-CH<sub>2</sub>-N), (dd,  $J = \text{Hz}$ , 2H, P-CH<sub>2</sub>-C), (t,  $J = 14, 7$  Hz, 3H, CH<sub>3</sub>-);  $^{13}\text{C}$  NMR ( $\text{CDCl}_3$ , 75.45 MHz)  $\delta$  139.5, 128.7, 128.5, 127.9, 127.8, 127.5, 120.5, 120.3, 61.1 (d,  $J_{\text{POC}} = 6$  Hz), 55.3 (d,  $J_{\text{PCNC}} = 16$  Hz), 45.4 (d,  $J_{\text{PC}} = 106$  Hz), 33.1 (d,  $J_{\text{PC}} = 88$  Hz), 16.8 (d,  $J_{\text{POCC}} = 6$  Hz);  $^{31}\text{P}$  NMR ( $\text{CDCl}_3$ , 121.47 MHz)  $\delta$  51.1 (s).

**Ethyl ((N-benzyl)aminomethyl)-cinnamylphosphinate (Scheme 6, compound 12b).**

To compound **8** (12.5 mmol) in toluene (60 mL) was added 1,3,5-tribenzylhexahydro-1,3,5-triazine (0.4 equiv, 15 mmol, 2.72 g). After 16 h of reflux, the mixture was concentrated and the resulting oil was diluted in EtOAc (60 mL) and washed with brine (1 x 20 mL). The organic layer was dried and concentrated. The resulting oil was purified by column chromatography (silica, EtOAc/Hexanes 3:7, v/v) to afford the desired product as a yellow oil (2.36 g, 83%):  $^1\text{H}$  NMR ( $\text{CDCl}_3$ , 300 MHz)  $\delta$  7.20-7.35 (m, 10H, *aro* CH), 6.49 (dd,  $J = 16, 4$  Hz, 1H, -CH=), 6.00-6.20 (m, 1H, CH=), 4.00-4.20 (m, 2H, -CH<sub>2</sub>-O-), 3.84 (s, 2H, -CH<sub>2</sub>-Ph), 2.91 (d,  $J = 11$  Hz, 2H, -P-CH<sub>2</sub>-N), 2.83 (dd,  $J = 18, 8$  Hz, 2H, P-CH<sub>2</sub>-C), 1.31 (t,  $J = 14, 7$  Hz, 3H, CH<sub>3</sub>-);  $^{13}\text{C}$  NMR ( $\text{CDCl}_3$ , 75.45 MHz)  $\delta$  139.5, 137.1, 137.0, 135.1, 134.9, 128.8, 128.7, 128.5, 127.8, 127.5, 126.5, 126.4, 119.3, 119.1, 61.2 (d,  $J_{\text{POC}} = 7$  Hz), 55.4 (d,  $J_{\text{PCNC}} = 17$  Hz), 45.6 (d,  $J_{\text{PC}} = 106$  Hz), 32.4 (d,  $J_{\text{PC}} = 88$  Hz), 16.9 (d,  $J_{\text{POCC}} = 6$  Hz);  $^{31}\text{P}$  NMR ( $\text{CDCl}_3$ , 121.47 MHz)  $\delta$  51.3 (s).

**Cyclization attempt from compound 12a.** To the ethyl allyl-N-benzyl(aminomethyl)-*H*-phosphinate (1 mmol, 315 mg) in DMSO (20 mL) were added Pd(OAc)<sub>2</sub> (5 mol%, 11.2 mg) and NaOAc (2 equiv, 164.1 mg). The flask was flushed with O<sub>2</sub> and equipped with an O<sub>2</sub> balloon. The reaction mixture was stirred at 80 °C for 60 h. The mixture was then cooled to room temperature, diluted with ether (10 mL) and THF (10 mL) and washed with brine (10 mL). The layers were separated and the aqueous layer was extracted with ether (2 x 10 mL). The combined organic layers were dried and concentrated.

## **References**

- [1] Deprèle, S.; Montchamp, J.-L. *J. Org. Chem.*, 2001, **66**, 6745.
- [2] Deprèle, S.; Montchamp, J.-L. *J. Organomet. Chem.*, 2002, **643-644**, 154.
- [3] Montchamp, J.-L.; Dumond, Y. R. *J. Am. Chem. Soc.*, 2001, **123**, 510.
- [4] Abrunhosa-Thomas, I.; Sellers, C.E.; Montchamp, J.-L. *J. Org. Chem.*, 2007, **72**,
- [5] Bravo-Altamirano, K.; Montchamp, J.-L. *Org. Lett.*, 2006, **8**, 4169.
- [6] Abrunhosa-Thomas, I.; Ribiere, P.; Adcock, A.C.; Montchamp, J.-L. *Synthesis*, 2006, 325.

| INDEX | FREQUENCY | PPM    | HEIGHT |
|-------|-----------|--------|--------|
| 1     | 4579.258  | 37.701 | 126.0  |

<sup>31</sup>P-NMR (<sup>1</sup>H decoupled)

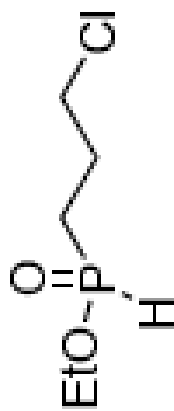

**1 (Scheme 2)**

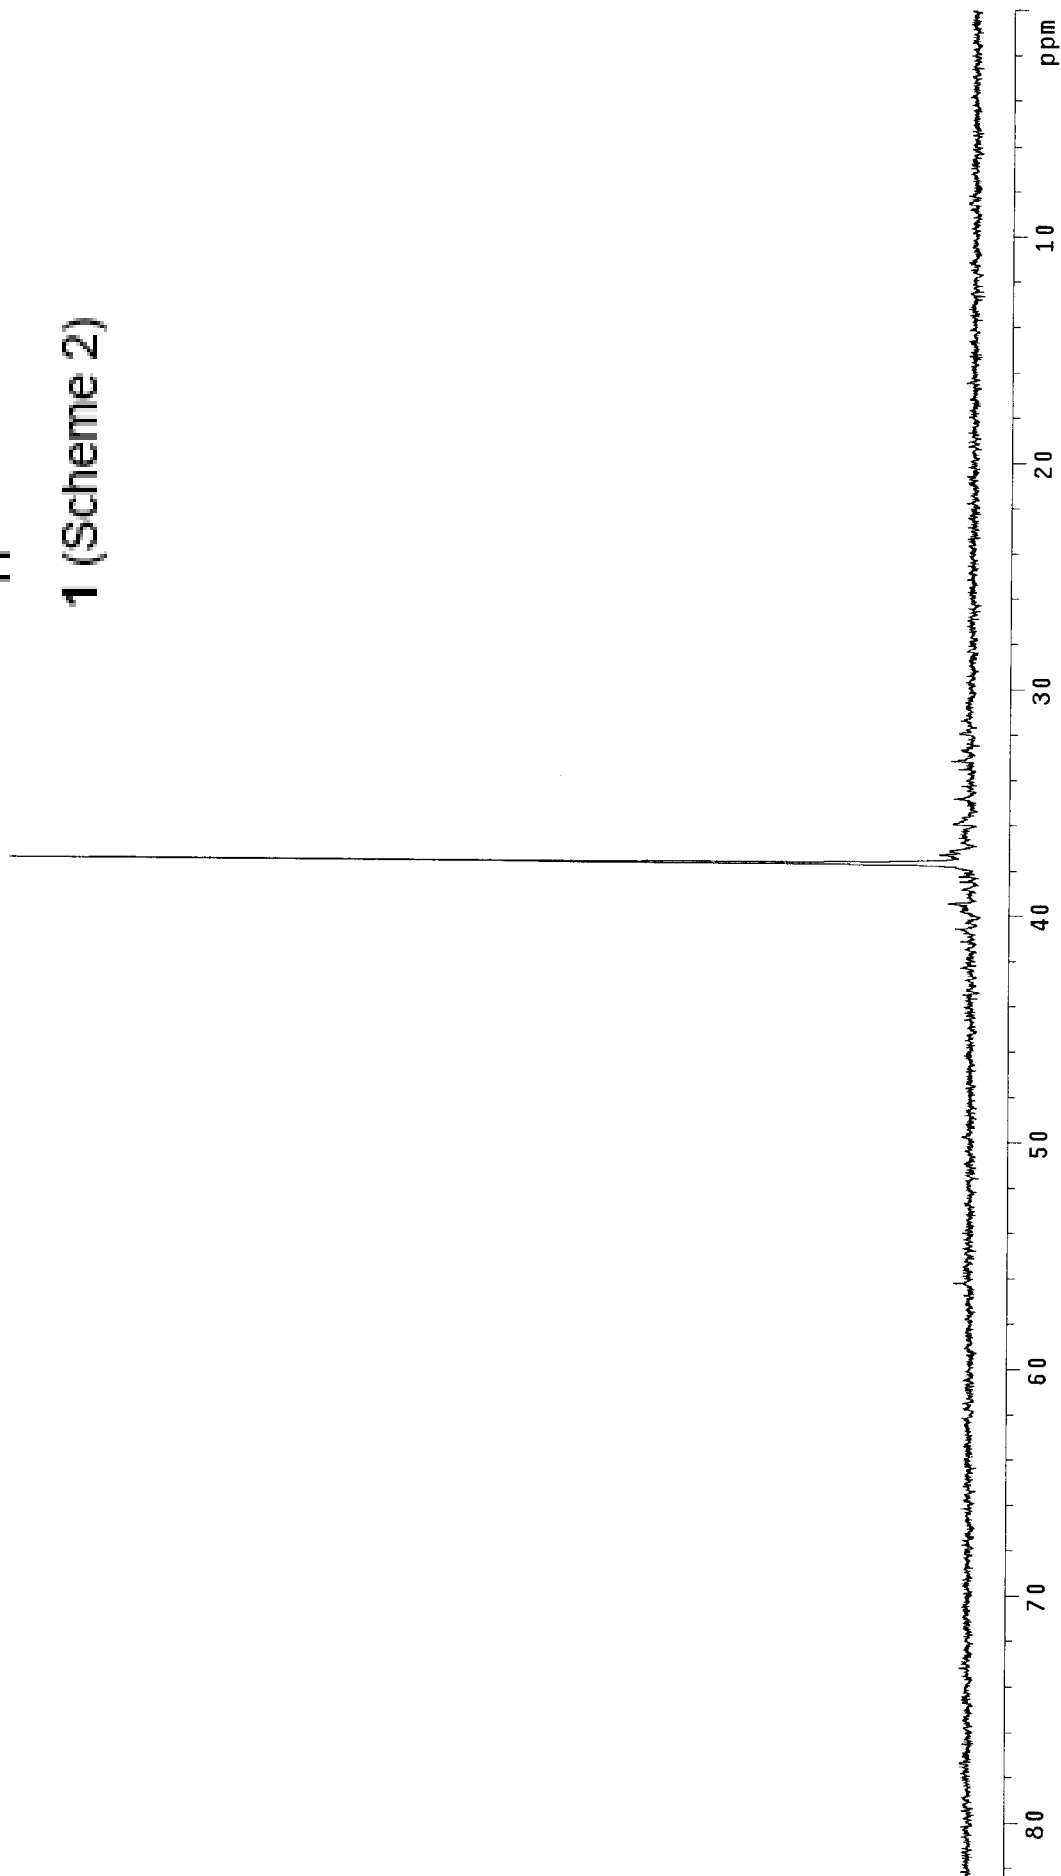



| INDEX | FREQUENCY | PPM    | HEIGHT |
|-------|-----------|--------|--------|
| 1     | 4846.888  | 39.904 | 43.9   |
| 2     | 4314.881  | 35.524 | 40.7   |

<sup>31</sup>P-NMR (1H coupled)

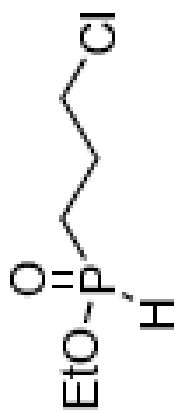

**1** (Scheme 2)

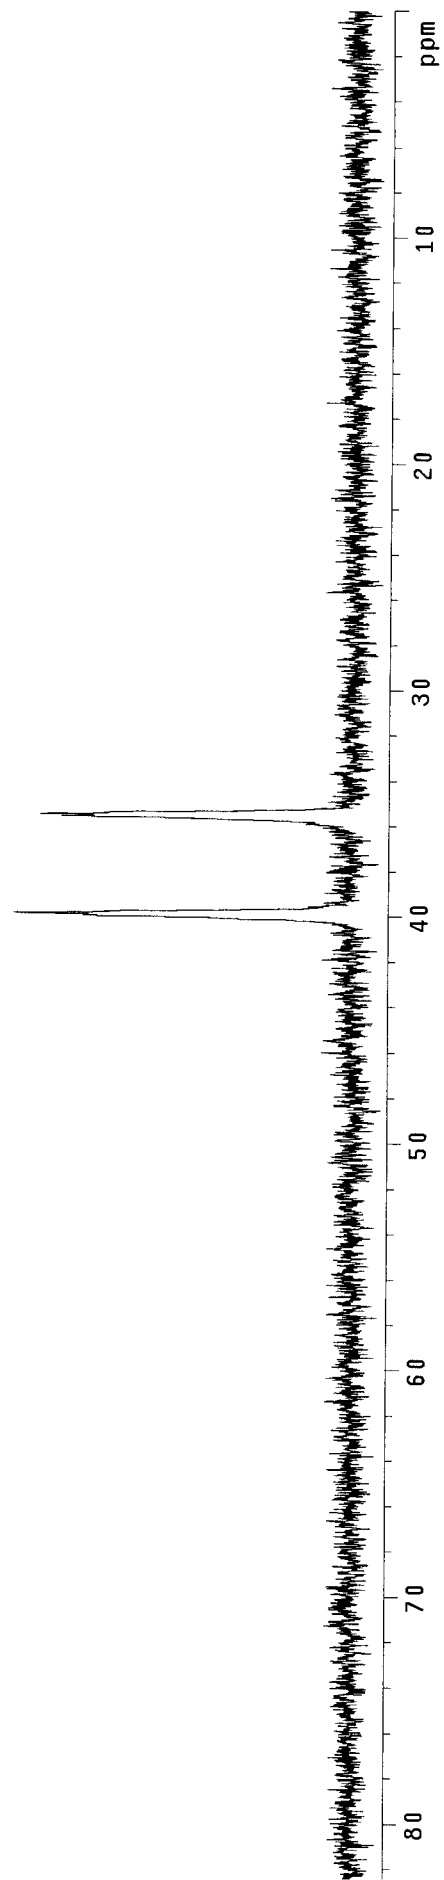

# <sup>1</sup>H-NMR

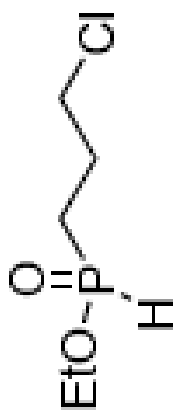

**1** (Scheme 2)

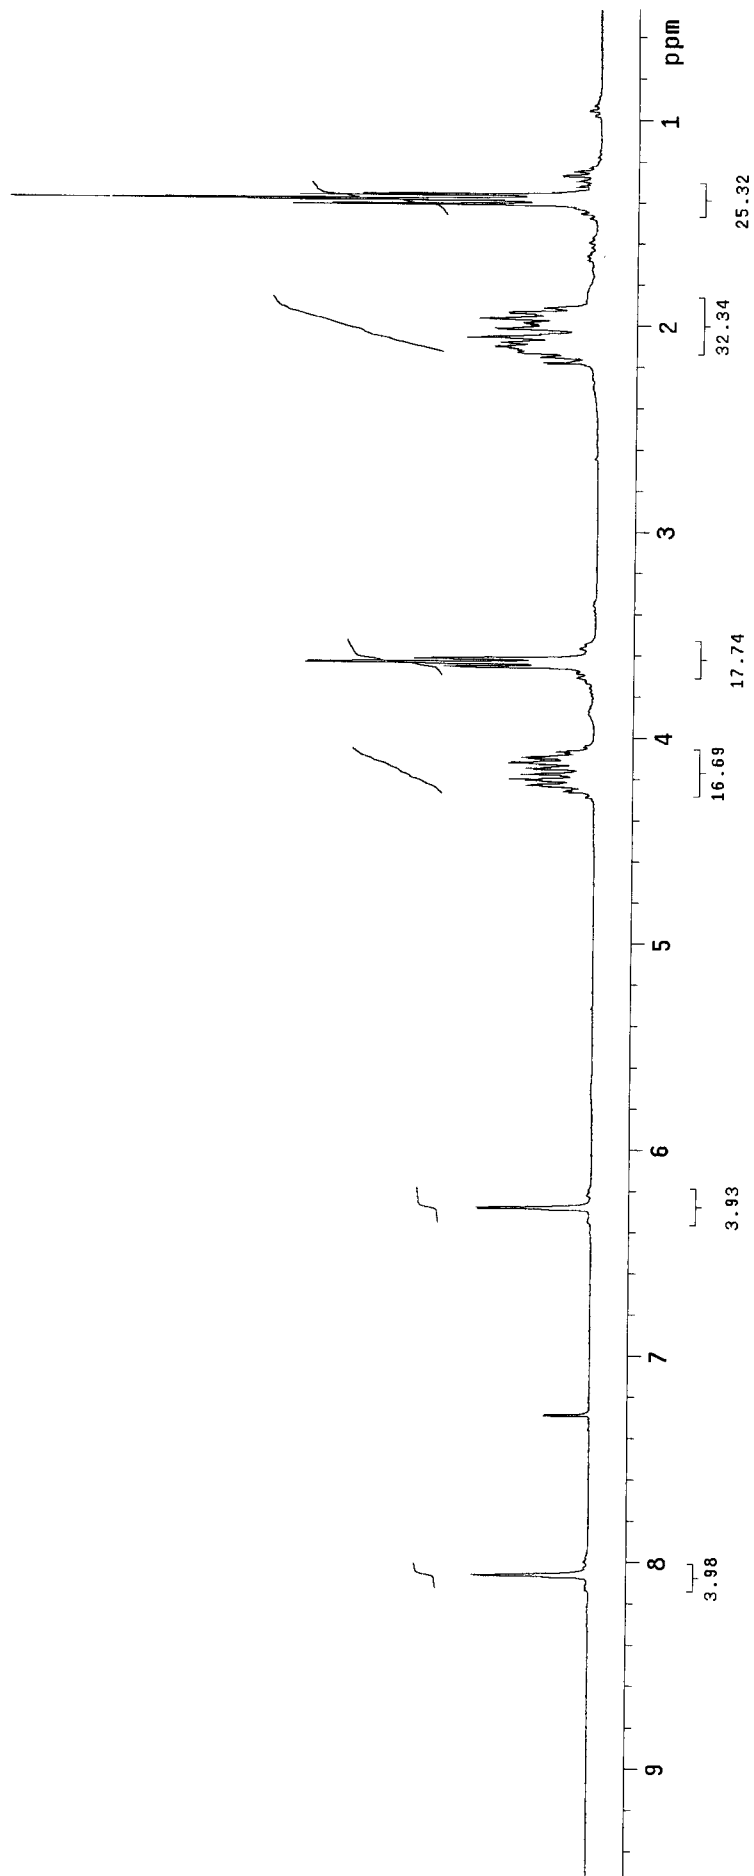

### <sup>13</sup>C-NMR

| INDEX | FREQUENCY | PPM    | HEIGHT |
|-------|-----------|--------|--------|
| 1     | 5869.954  | 77.801 | 20.9   |
| 2     | 5837.997  | 77.378 | 22.0   |
| 3     | 5806.040  | 76.954 | 21.5   |
| 4     | 4743.970  | 62.877 | 11.3   |
| 5     | 4737.061  | 62.786 | 11.5   |
| 6     | 3986.015  | 45.011 | 16.5   |
| 7     | 3378.453  | 44.779 | 16.9   |
| 8     | 2035.679  | 26.981 | 17.8   |
| 9     | 1940.960  | 25.726 | 17.6   |
| 10    | 1828.678  | 24.238 | 20.1   |
| 11    | 1826.663  | 24.211 | 21.4   |
| 12    | 1242.798  | 16.472 | 14.6   |
| 13    | 1236.752  | 16.392 | 15.6   |

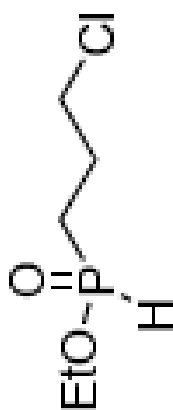

**1** (Scheme 2)

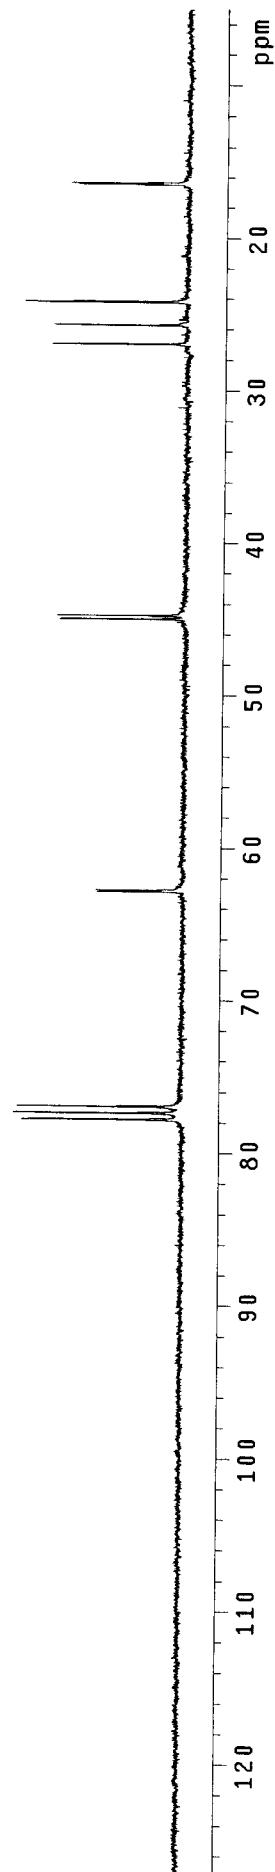

| INDEX | FREQUENCY | PPM    | HEIGHT |
|-------|-----------|--------|--------|
| 1     | 4708.998  | 38.769 | 29.9   |

$^{31}\text{P}$ -NMR ( $^1\text{H}$  decoupled)

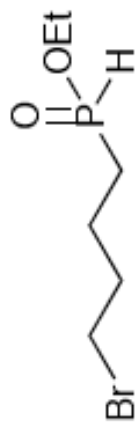

**2** (Equation 2)

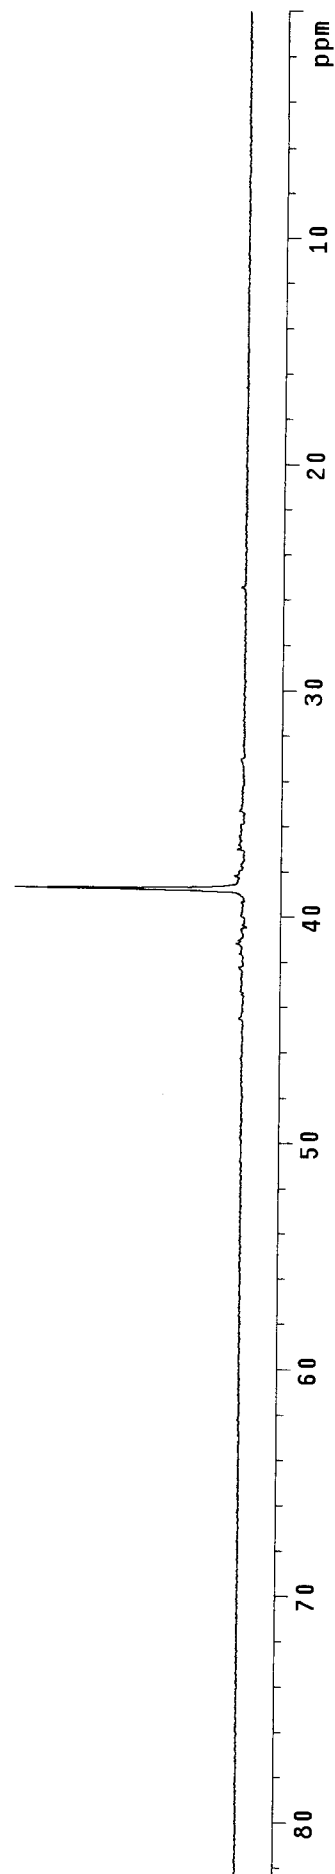

| INDEX | FREQUENCY | PPM    | HEIGHT |
|-------|-----------|--------|--------|
| 1     | 4376.231  | 40.969 | 29.1   |
| 2     | 4445.846  | 36.603 | 26.9   |

<sup>31</sup>P-NMR (1H coupled)

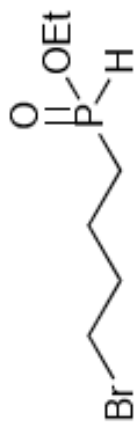

**2** (Equation 2)

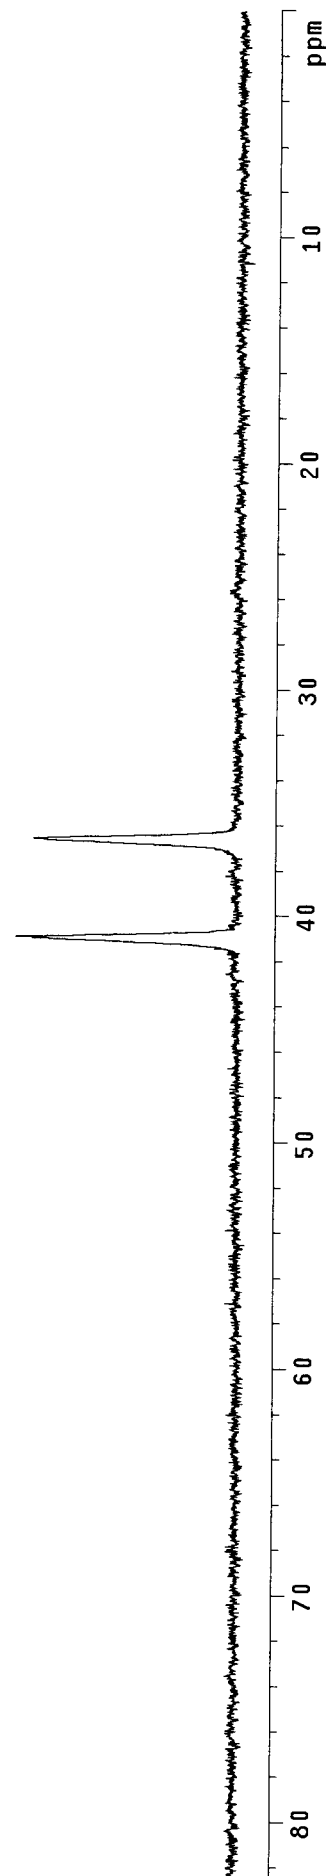

# $^1\text{H-NMR}$

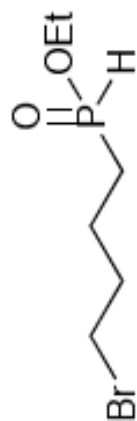

**2** (Equation 2)

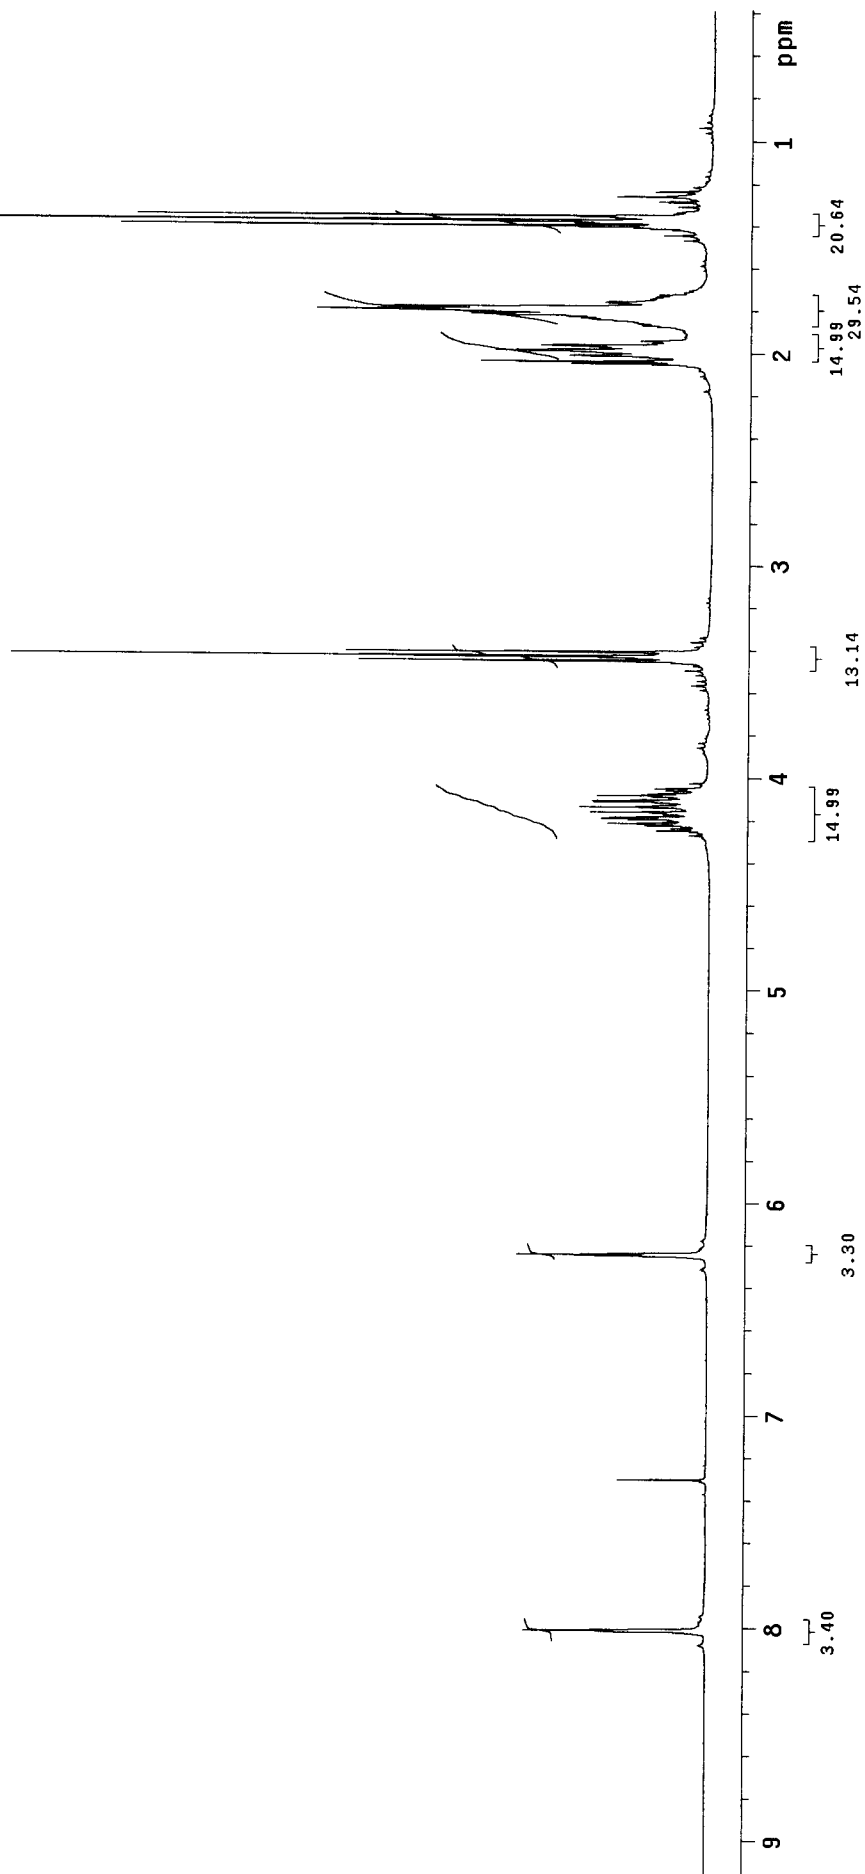

### <sup>13</sup>C-NMR

| INDEX | FREQUENCY PPM | HEIGHT |
|-------|---------------|--------|
| 1     | 5877.151      | 7.4    |
| 2     | 5844.906      | 7.5    |
| 3     | 5812.949      | 7.2    |
| 4     | 4730.727      | 7.3    |
| 5     | 4723.817      | 7.3    |
| 6     | 2506.111      | 10.7   |
| 7     | 2490.852      | 10.4   |
| 8     | 2473.002      | 18.6   |
| 9     | 2152.279      | 9.6    |
| 10    | 2058.136      | 9.3    |
| 11    | 1480.893      | 13.7   |
| 12    | 1241.934      | 9.8    |
| 13    | 1236.176      | 8.2    |

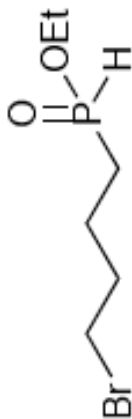

**2** (Equation 2)

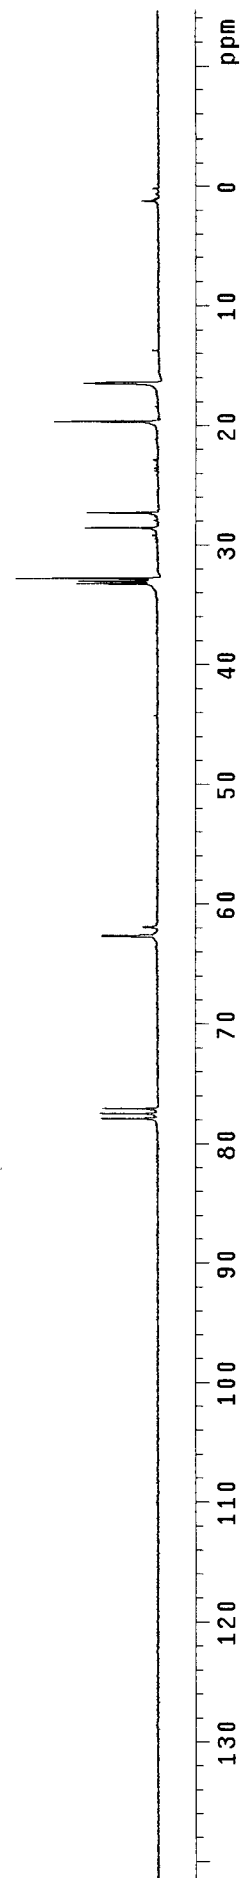

| INDEX | FREQUENCY | PPM    | HEIGHT |
|-------|-----------|--------|--------|
| 1     | 4546.619  | 37.432 | 15.2   |

<sup>31</sup>P-NMR (1H decoupled)

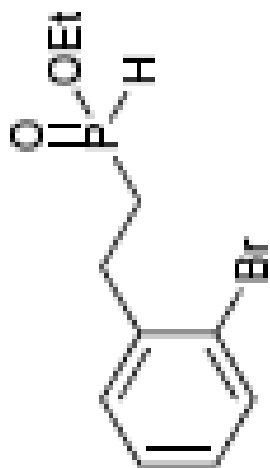

5 (Equation 3)

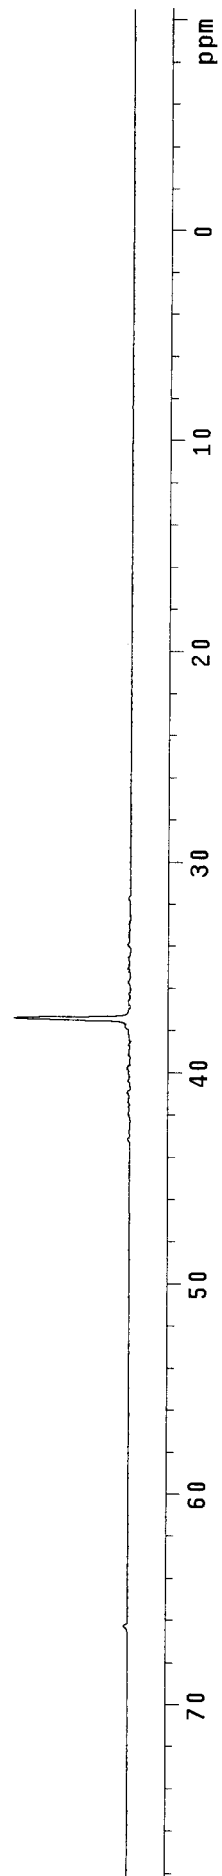



| INDEX | FREQUENCY | PPM    | HEIGHT |
|-------|-----------|--------|--------|
| 1     | 4817.116  | 39.659 | 41.9   |
| 2     | 4284.690  | 35.276 | 41.1   |

<sup>31</sup>P-NMR (<sup>1</sup>H coupled)

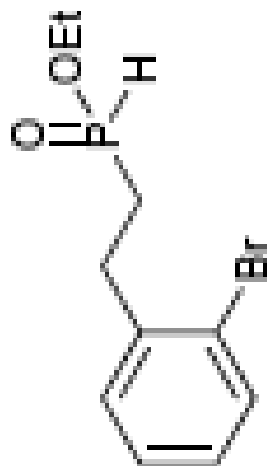

5 (Equation 3)

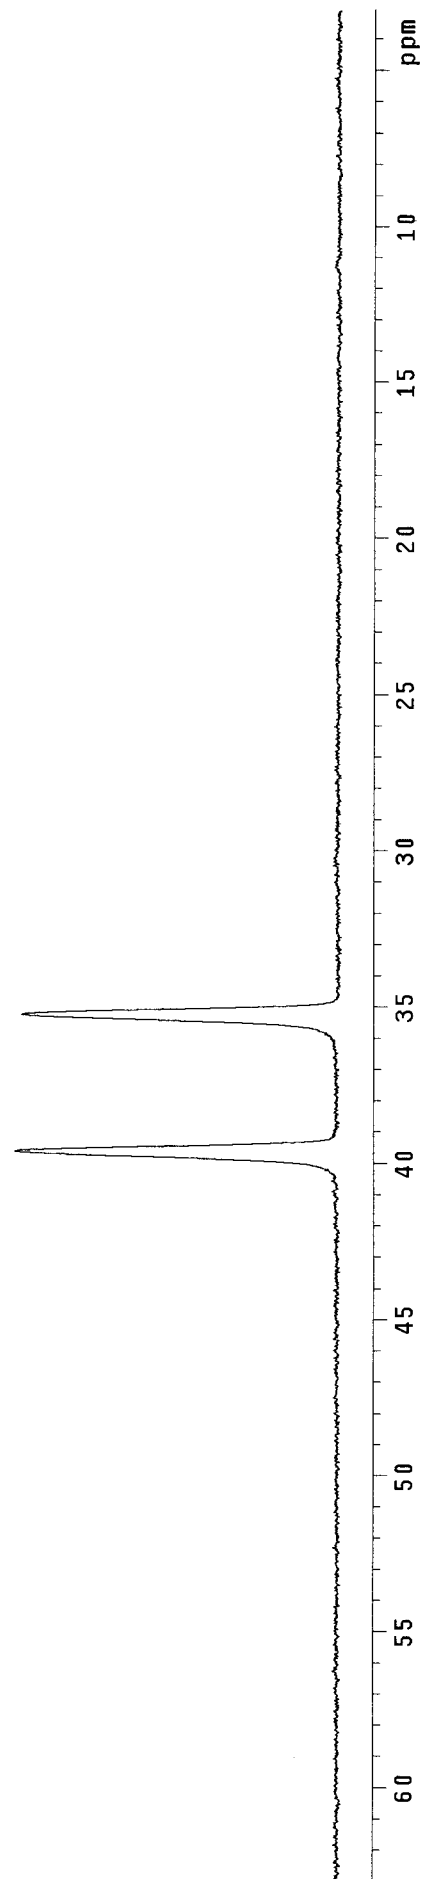

# <sup>1</sup>H-NMR

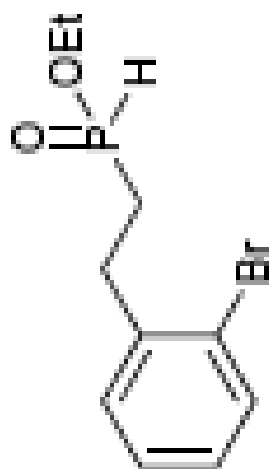

5 (Equation 3)

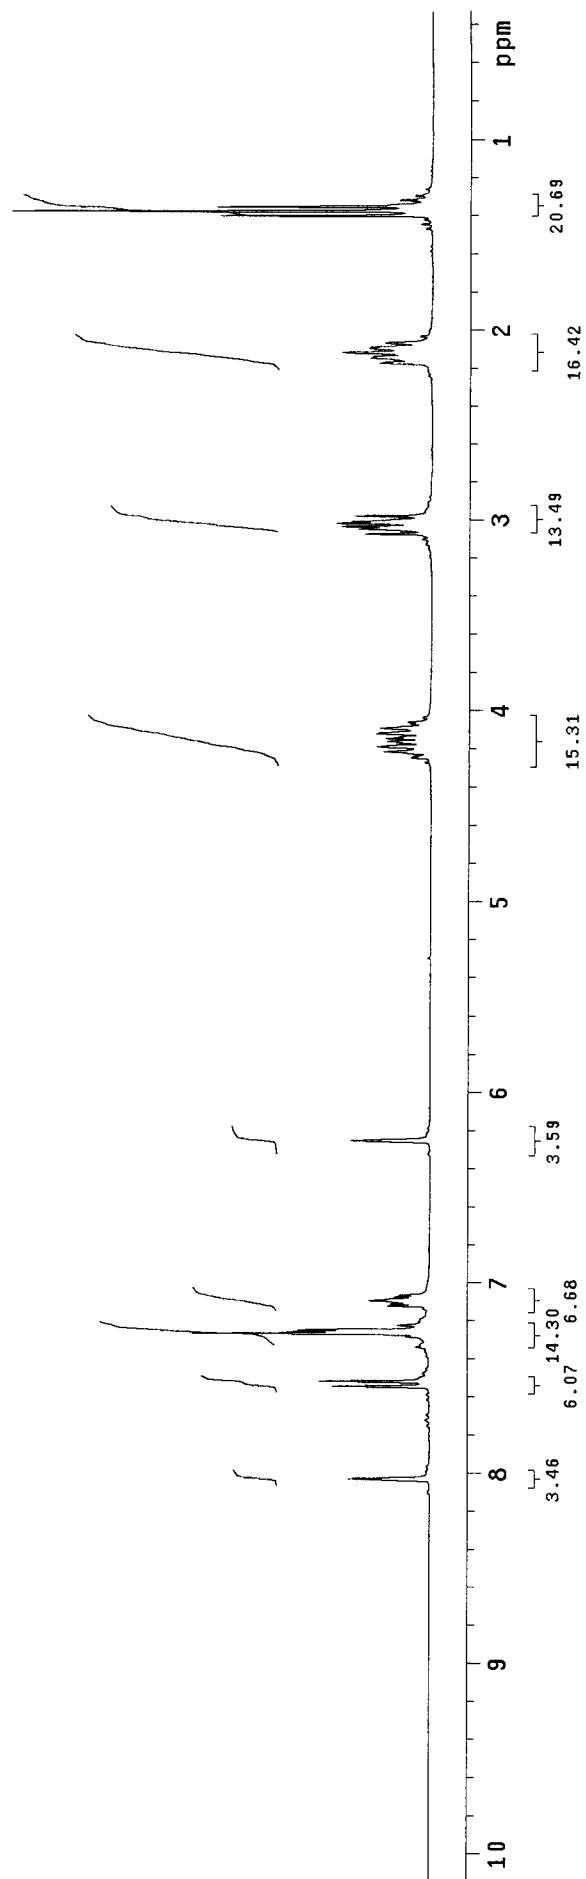

### $^{13}\text{C-NMR}$

| INDEX | FREQUENCY | PPM     |
|-------|-----------|---------|
| 1     | 10544.326 | 139.756 |
| 2     | 10528.491 | 139.547 |
| 3     | 10050.862 | 133.216 |
| 4     | 9843.861  | 130.472 |
| 5     | 9702.218  | 128.595 |
| 6     | 9657.013  | 127.996 |
| 7     | 9375.157  | 124.260 |
| 8     | 5875.424  | 77.874  |
| 9     | 5843.179  | 77.447  |
| 10    | 5811.222  | 77.023  |
| 11    | 4732.742  | 62.729  |
| 12    | 4725.833  | 62.637  |
| 13    | 2229.437  | 29.549  |
| 14    | 2137.309  | 28.328  |
| 15    | 2104.776  | 27.897  |
| 16    | 1247.692  | 16.537  |
| 17    | 1241.646  | 16.457  |

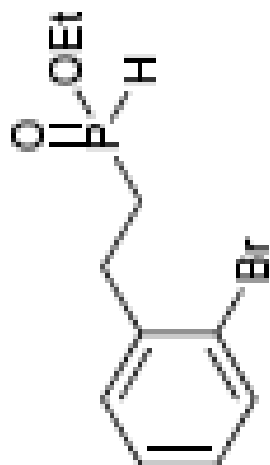

**5 (Equation 3)**

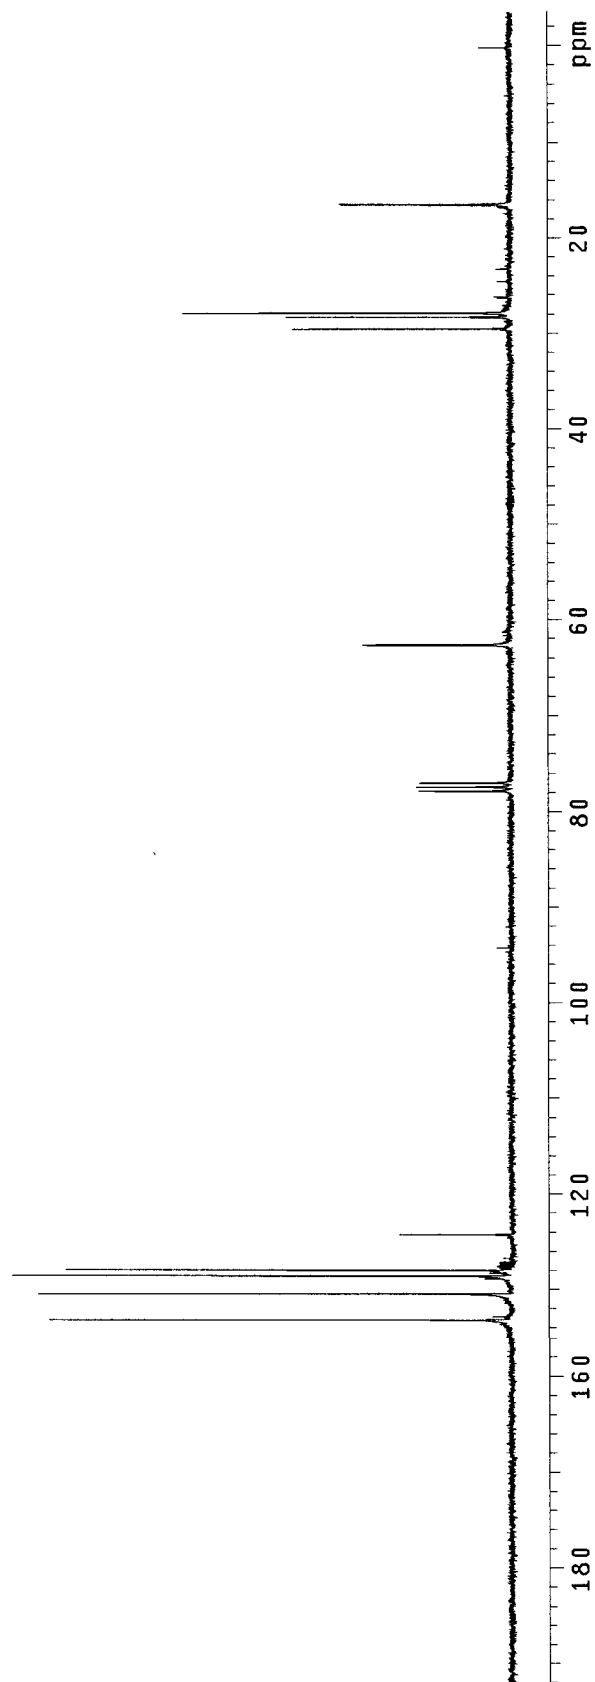

| INDEX | FREQUENCY PPM | HEIGHT |
|-------|---------------|--------|
| 1     | 2831.025      | 23.308 |
|       |               | 47.5   |

<sup>31</sup>P-NMR (<sup>1</sup>H decoupled)

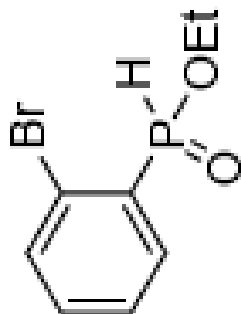

**3** (Scheme 3)

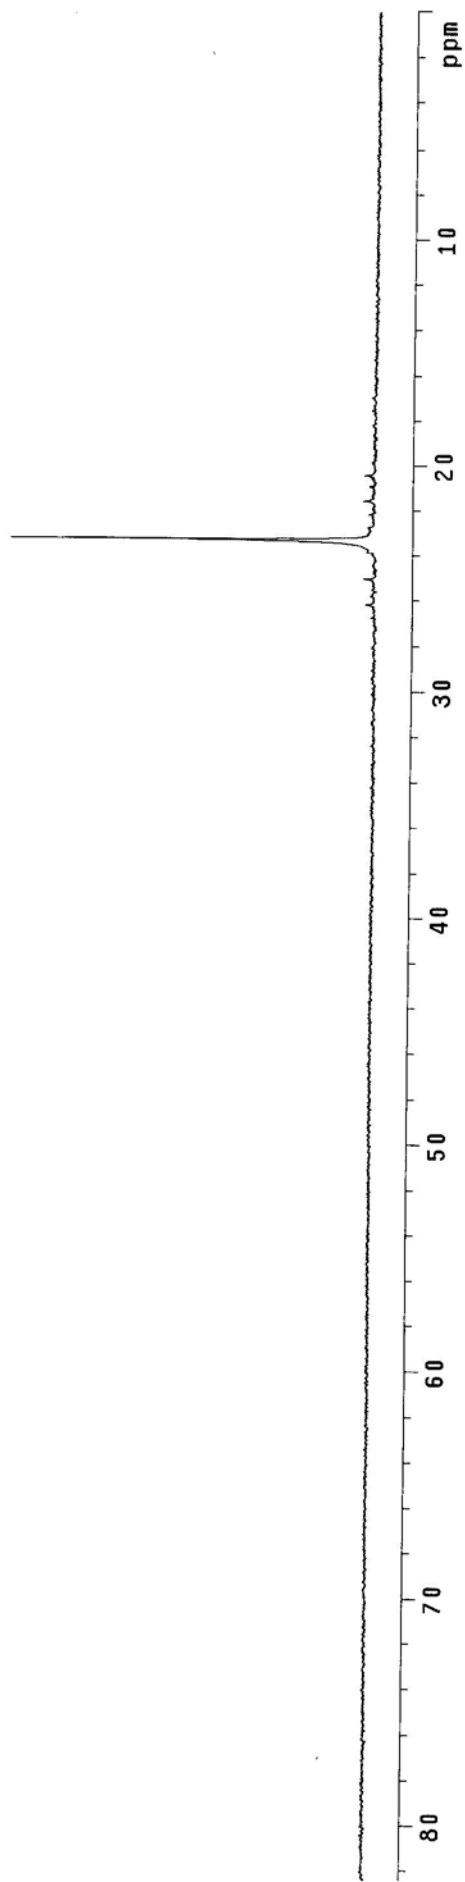

| INDEX | FREQUENCY | PPM    | HEIGHT |
|-------|-----------|--------|--------|
| 1     | 3131.713  | 25.783 | 96.5   |
| 2     | 2542.169  | 20.930 | 101.0  |

<sup>31</sup>P-NMR (<sup>1</sup>H coupled)

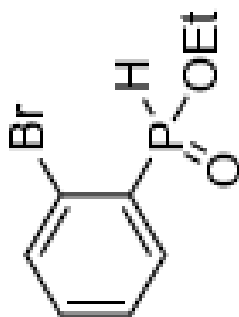

**3** (Scheme 3)

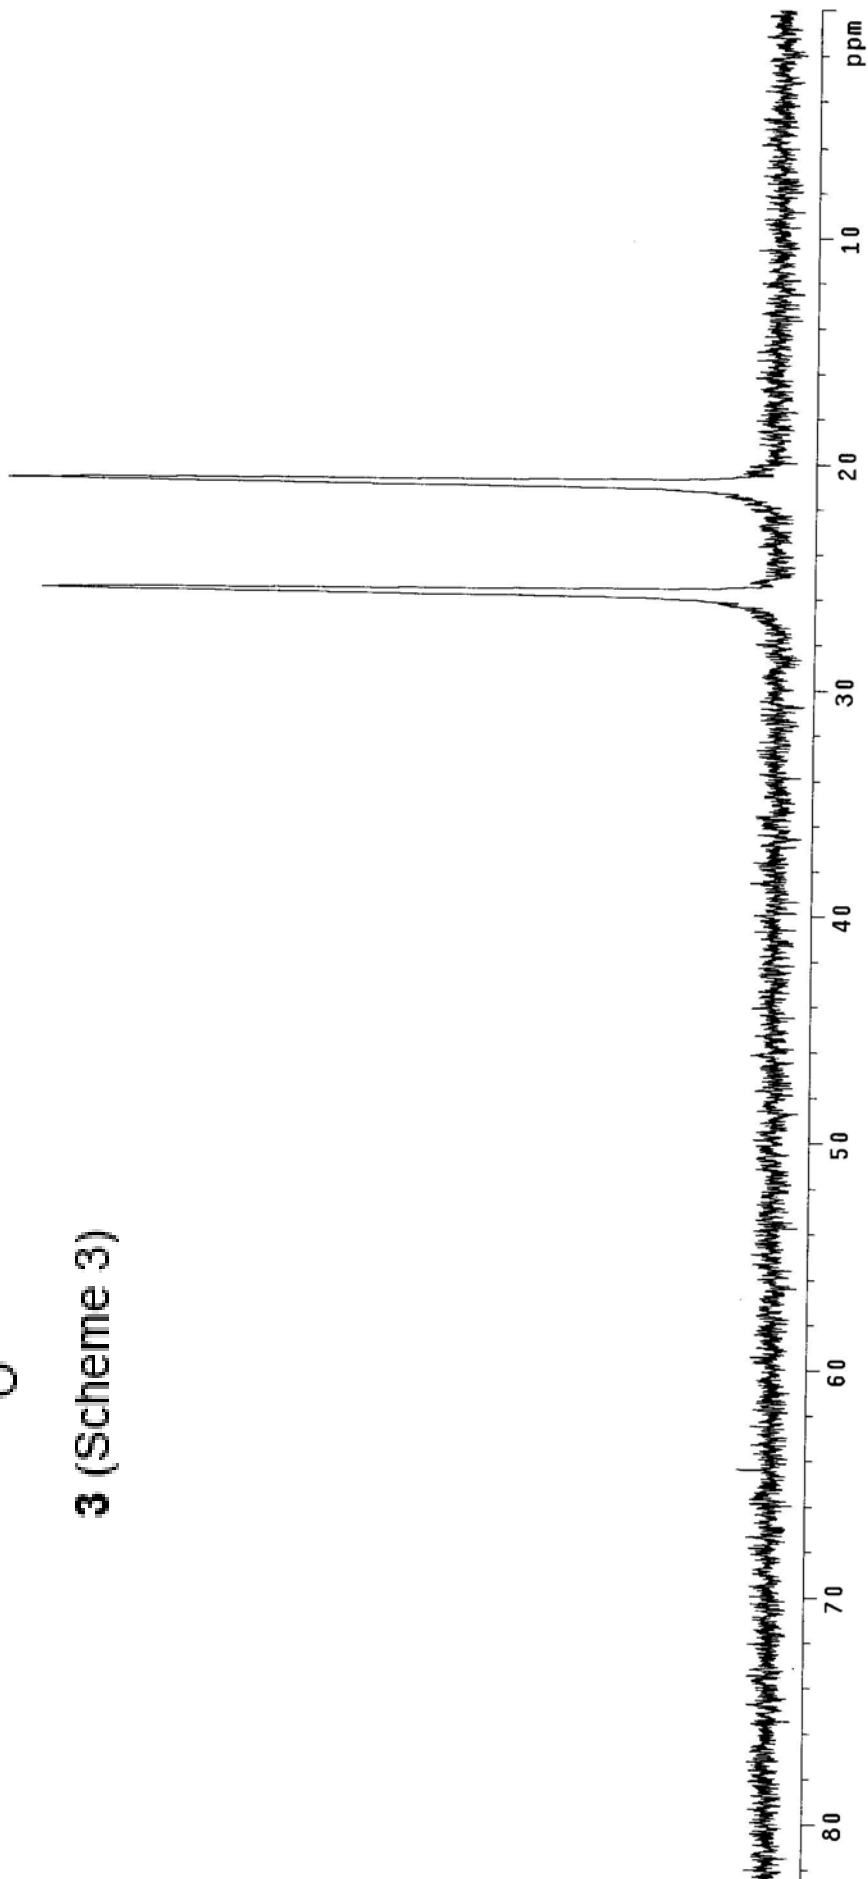

# <sup>1</sup>H-NMR

| INDEX | FREQUENCY PPM | HEIGHT |
|-------|---------------|--------|
| 1     | 2593.848      | 27.2   |
| 2     | 2403.003      | 7.7    |
| 3     | 2393.622      | 8.5    |
| 4     | 2390.104      | 7.6    |
| 5     | 2380.723      | 7.8    |
| 6     | 2293.069      | 8.2    |
| 7     | 2291.310      | 11.5   |
| 8     | 2289.258      | 9.1    |
| 9     | 2286.033      | 8.0    |
| 10    | 2283.981      | 8.7    |
| 11    | 2247.044      | 10.3   |
| 12    | 2245.285      | 15.2   |
| 13    | 2242.646      | 14.4   |
| 14    | 2241.474      | 13.3   |
| 15    | 2240.887      | 13.6   |
| 16    | 2240.008      | 17.1   |
| 17    | 2238.542      | 21.1   |
| 18    | 2235.904      | 9.3    |
| 19    | 2235.317      | 11.0   |
| 20    | 2234.731      | 9.5    |
| 21    | 2234.145      | 9.6    |
| 22    | 2232.679      | 7.9    |
| 23    | 2004.896      | 26.9   |
| 24    | 1267.315      | 10.7   |
| 25    | 1259.693      | 14.6   |
| 26    | 1258.227      | 12.3   |
| 27    | 1252.364      | 12.6   |
| 28    | 1251.191      | 13.1   |
| 29    | 1250.605      | 15.1   |
| 30    | 1243.569      | 10.9   |
| 31    | 425.077       | 48.8   |
| 32    | 418.041       | 90.8   |
| 33    | 411.005       | 44.3   |

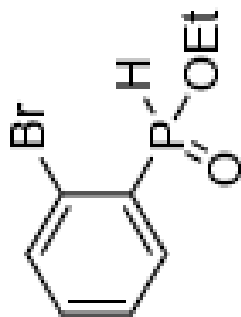

**3** (Scheme 3)

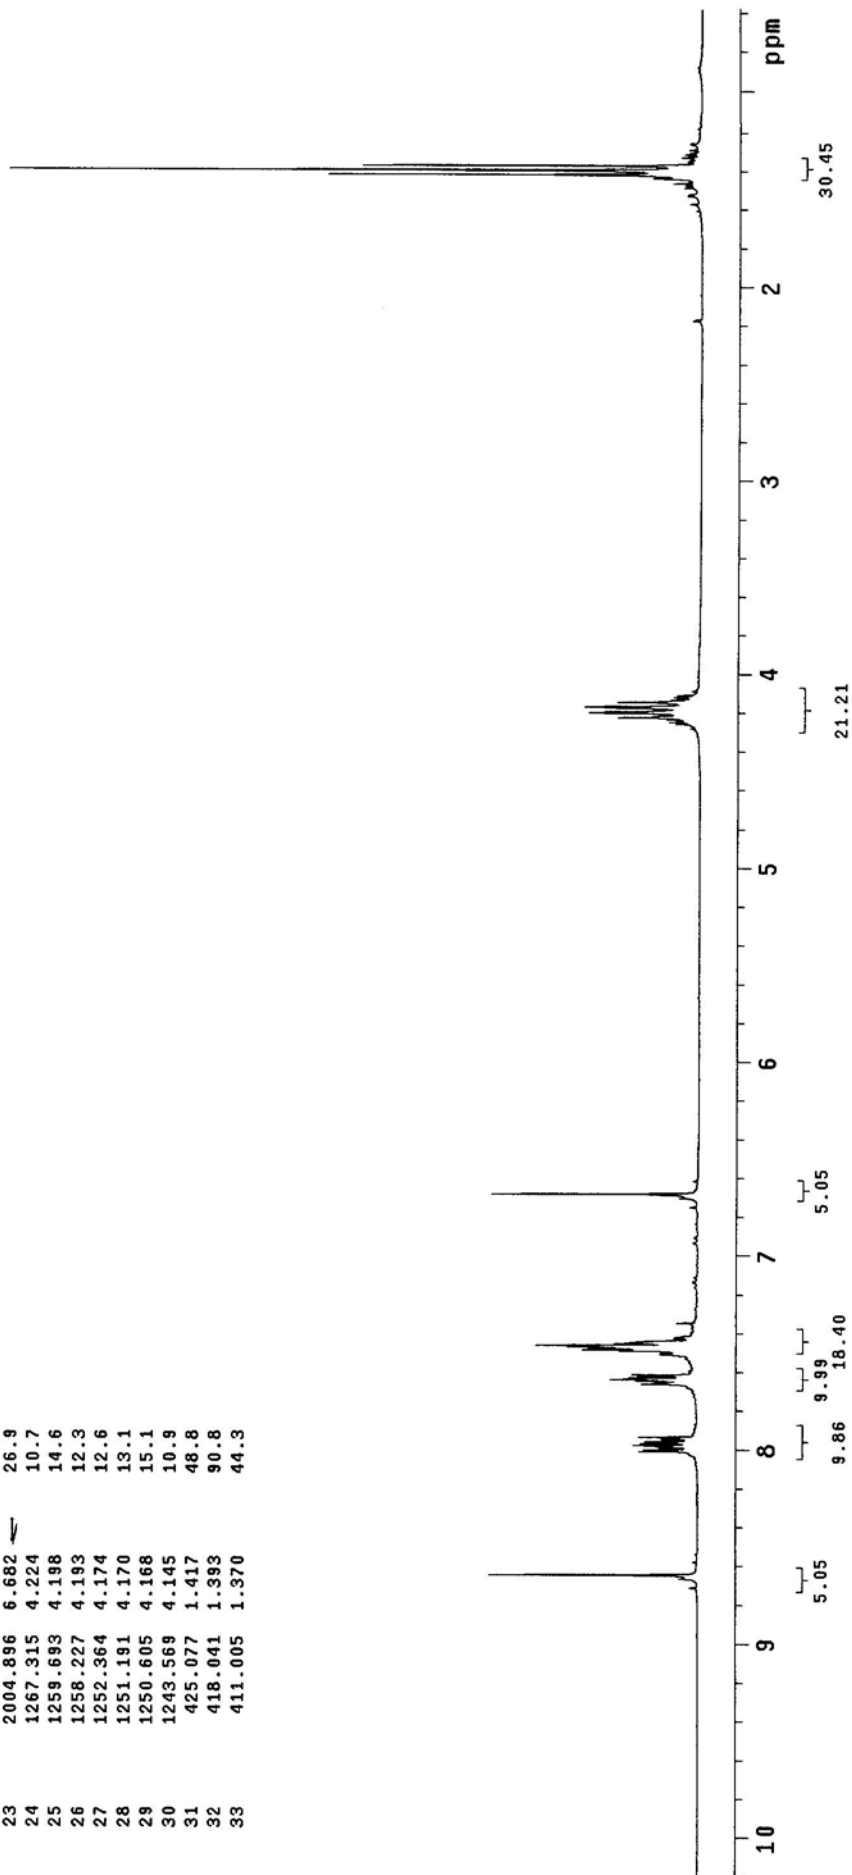

### <sup>13</sup>C-NMR

| INDEX | FREQUENCY | PPM     | HEIGHT |
|-------|-----------|---------|--------|
| 1     | 10180.418 | 134.933 | 25.9   |
| 2     | 10172.069 | 134.822 | 25.7   |
| 3     | 10153.355 | 134.574 | 26.5   |
| 4     | 10151.340 | 134.548 | 27.7   |
| 5     | 10097.502 | 133.834 | 24.2   |
| 6     | 10089.153 | 133.723 | 24.7   |
| 7     | 9873.803  | 130.869 | 5.3    |
| 8     | 9737.337  | 129.060 | 5.1    |
| 9     | 9719.199  | 128.820 | 1.4    |
| 10    | 9629.950  | 127.637 | 23.1   |
| 11    | 9618.434  | 127.484 | 23.4   |
| 12    | 9435.904  | 125.065 | 6.9    |
| 13    | 9427.843  | 124.958 | 7.0    |
| 14    | 5878.303  | 77.912  | 8.1    |
| 15    | 5846.058  | 77.485  | 8.6    |
| 16    | 5814.101  | 77.061  | 8.5    |
| 17    | 4745.986  | 62.904  | 13.4   |
| 18    | 4739.364  | 62.816  | 14.2   |
| 19    | 1245.677  | 16.510  | 17.8   |
| 20    | 1239.055  | 16.423  | 17.2   |
| 21    | 13.458    | 0.178   | 2.0    |

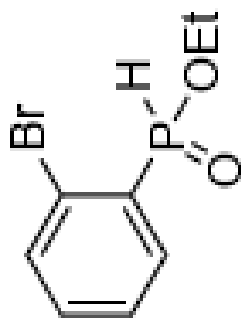

**3** (Scheme 3)

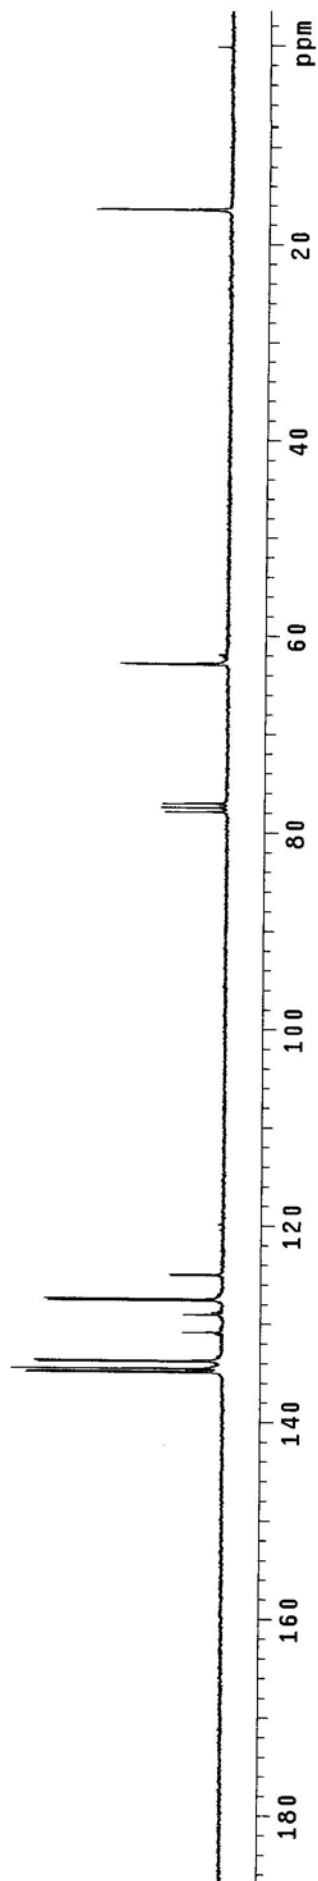

| INDEX | FREQUENCY | PPM    | HEIGHT |
|-------|-----------|--------|--------|
| 1     | 5392.380  | 44.395 | 51.7   |

$^{31}\text{P}$ -NMR ( $^1\text{H}$  decoupled)

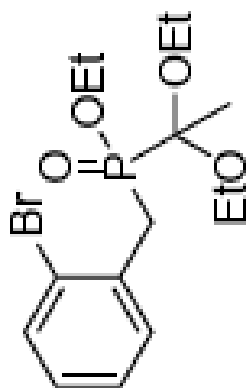

(Scheme 4)

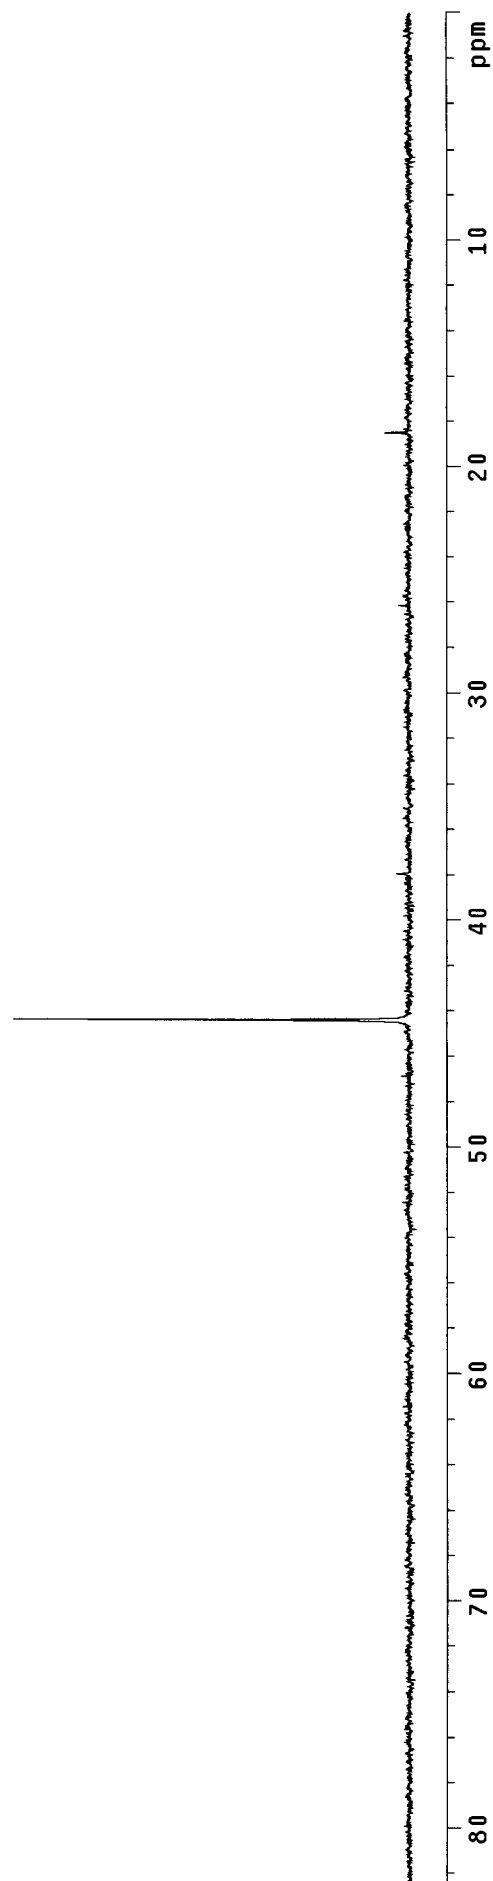



| INDEX | FREQUENCY PPM | HEIGHT |
|-------|---------------|--------|
| 1     | 5389.524      | 44.372 |
|       |               | 29.6   |

<sup>31</sup>P-NMR (<sup>1</sup>H coupled)

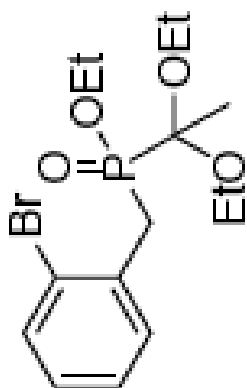

(Scheme 4)

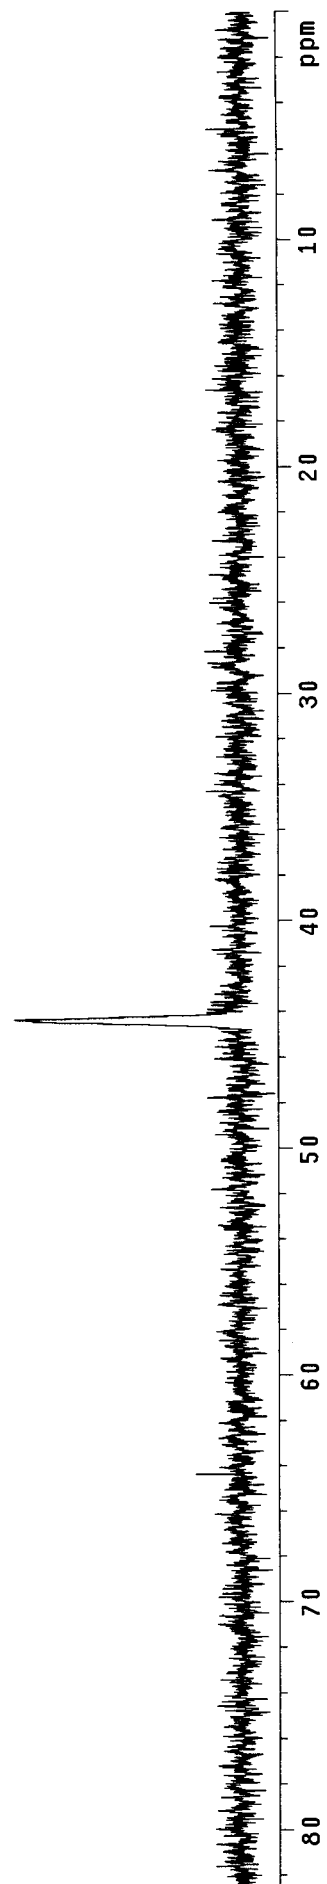

# $^1\text{H-NMR}$

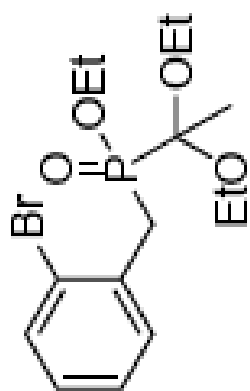

(Scheme 4)

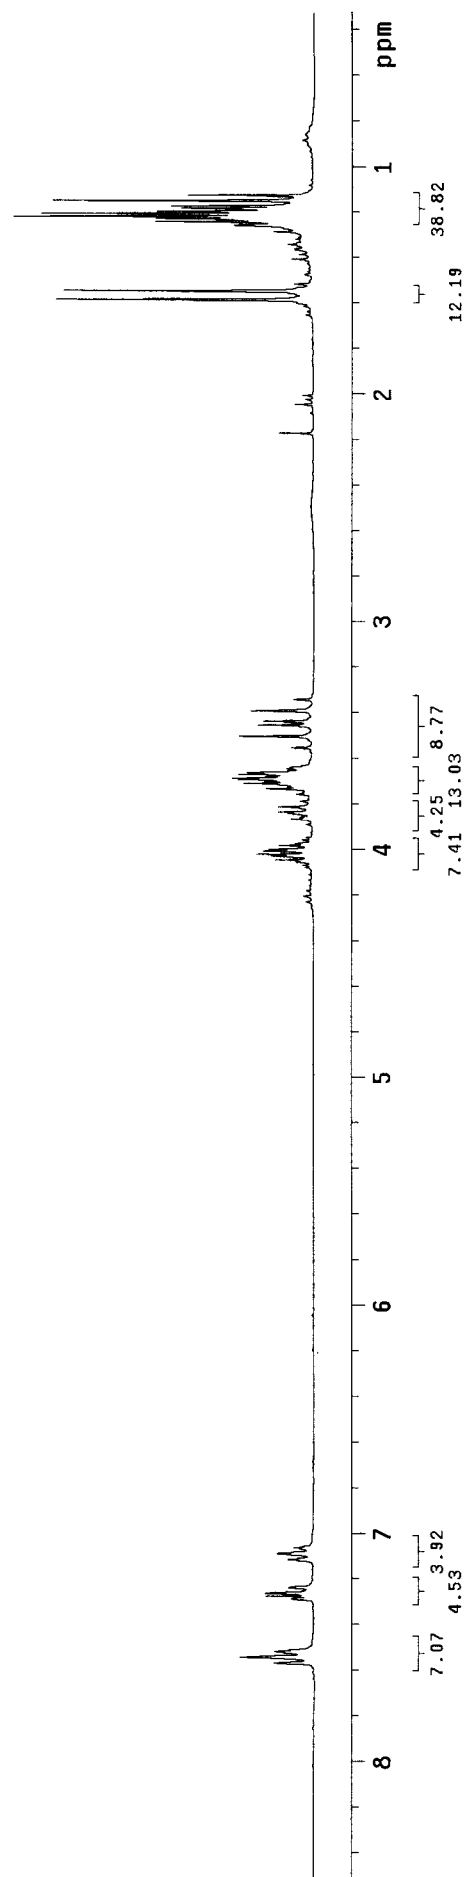

# <sup>13</sup>C-NMR

| INDEX | FREQUENCY | PPM     | HEIGHT |
|-------|-----------|---------|--------|
| 1     | 10039.922 | 133.071 | 14.1   |
| 2     | 10037.619 | 133.040 | 15.1   |
| 3     | 9983.493  | 132.323 | 14.0   |
| 4     | 9979.175  | 132.266 | 14.4   |
| 5     | 9961.037  | 132.025 | 4.1    |
| 6     | 9951.536  | 131.899 | 4.3    |
| 7     | 9695.303  | 128.503 | 13.1   |
| 8     | 9692.424  | 128.465 | 13.6   |
| 9     | 9622.176  | 127.534 | 13.2   |
| 10    | 9619.585  | 127.500 | 13.9   |
| 11    | 9467.285  | 125.481 | 3.8    |
| 12    | 9460.088  | 125.386 | 3.9    |
| 13    | 7731.814  | 102.479 | 4.7    |
| 14    | 7589.591  | 100.594 | 4.6    |
| 15    | 5861.317  | 77.687  | 31.0   |
| 16    | 5829.360  | 77.263  | 31.7   |
| 17    | 5797.403  | 76.840  | 31.4   |
| 18    | 4687.830  | 62.133  | 8.6    |
| 19    | 4680.344  | 62.034  | 8.4    |
| 20    | 4424.975  | 58.649  | 11.1   |
| 21    | 4420.081  | 58.585  | 10.9   |
| 22    | 4373.153  | 57.963  | 11.1   |
| 23    | 4365.668  | 57.863  | 11.0   |
| 24    | 2551.599  | 33.819  | 13.2   |
| 25    | 2472.426  | 32.770  | 12.9   |
| 26    | 2257.364  | 29.920  | 2.7    |
| 27    | 1557.475  | 20.643  | 11.8   |
| 28    | 1545.095  | 20.479  | 11.2   |
| 29    | 1262.375  | 16.732  | 10.7   |
| 30    | 1257.193  | 16.663  | 9.5    |
| 31    | 1190.112  | 15.774  | 19.2   |
| 32    | 1175.429  | 15.579  | 3.1    |
| 33    | 1169.095  | 15.495  | 18.4   |
| 34    | 16.049    | 0.213   | 5.6    |

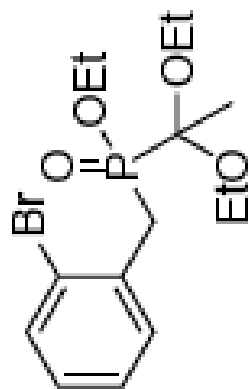

(Scheme 4)

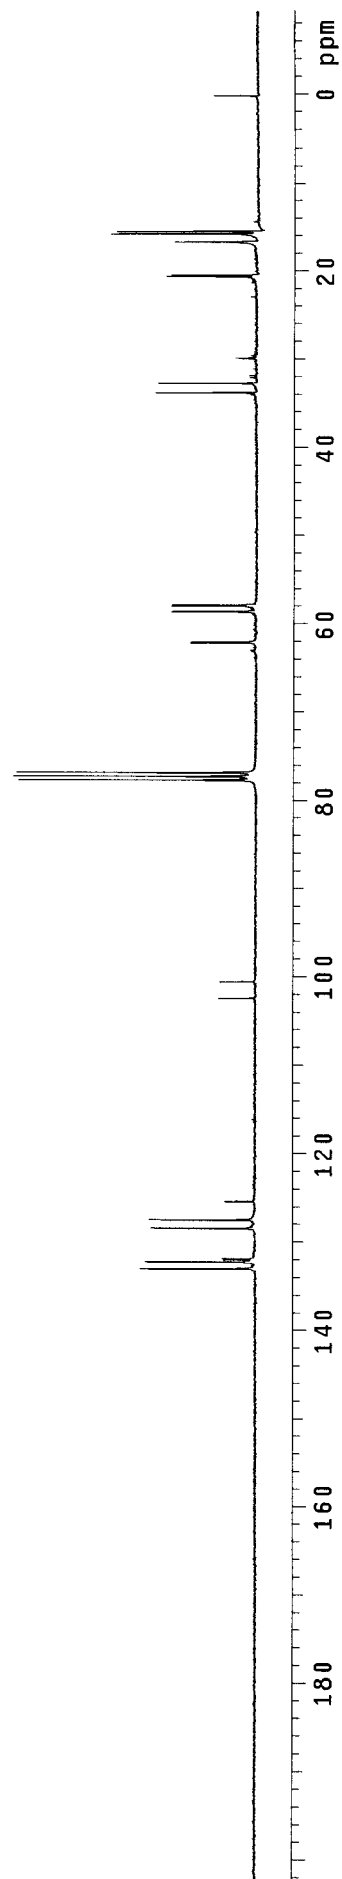

| INDEX | FREQUENCY PPM | HEIGHT |
|-------|---------------|--------|
| 1     | 4163.109      | 54.5   |

<sup>31</sup>P-NMR (<sup>1</sup>H decoupled)

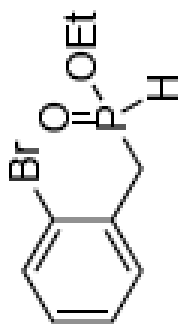

**4** (Scheme 4)

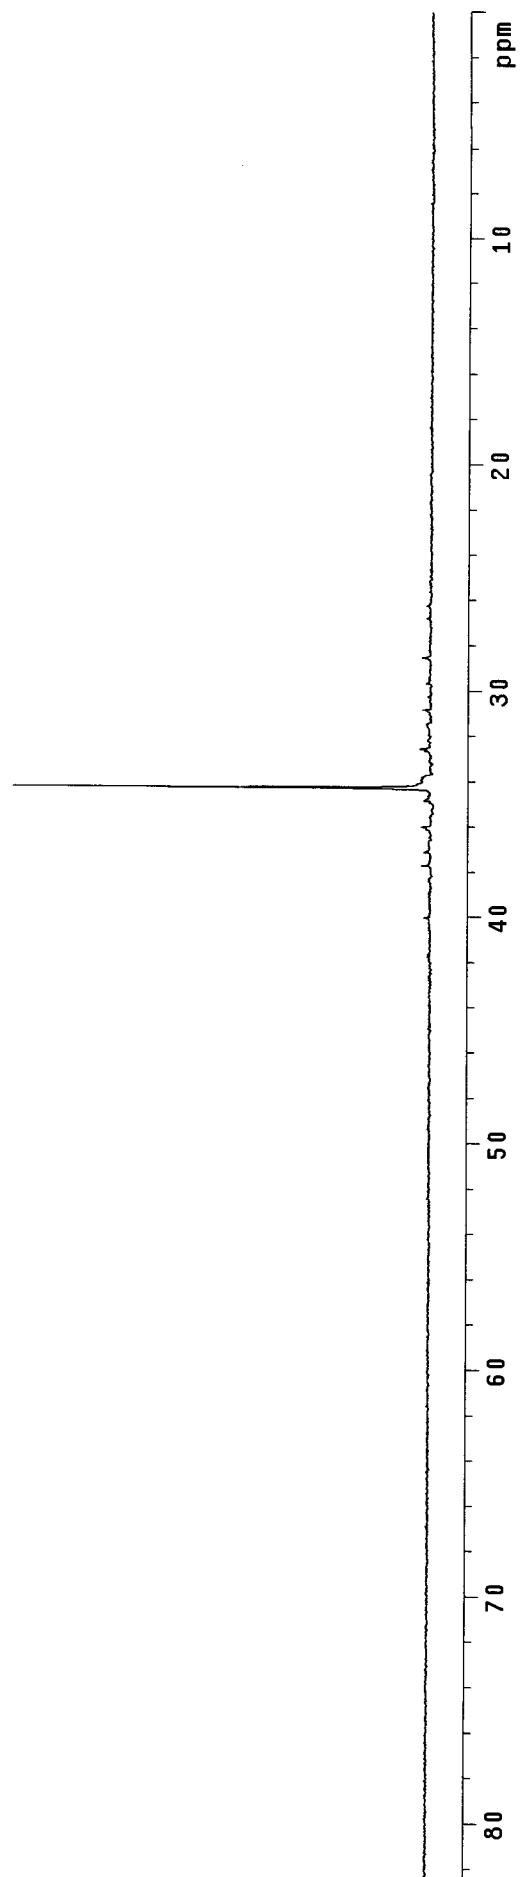

| INDEX | FREQUENCY | PPM    | HEIGHT |
|-------|-----------|--------|--------|
| 1     | 4460.533  | 36.723 | 27.9   |
| 2     | 4450.333  | 36.639 | 37.7   |
| 3     | 4441.358  | 36.566 | 46.2   |
| 4     | 4432.382  | 36.492 | 33.7   |
| 5     | 4422.182  | 36.408 | 22.1   |
| 6     | 3906.892  | 32.165 | 27.6   |
| 7     | 3897.100  | 32.085 | 38.4   |
| 8     | 3887.717  | 32.007 | 45.3   |
| 9     | 3878.741  | 31.934 | 34.8   |
| 10    | 3868.541  | 31.850 | 25.9   |

<sup>31</sup>P-NMR (<sup>1</sup>H coupled)

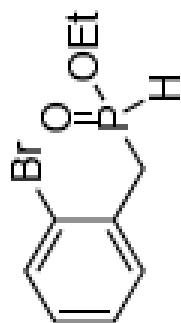

**4** (Scheme 4)

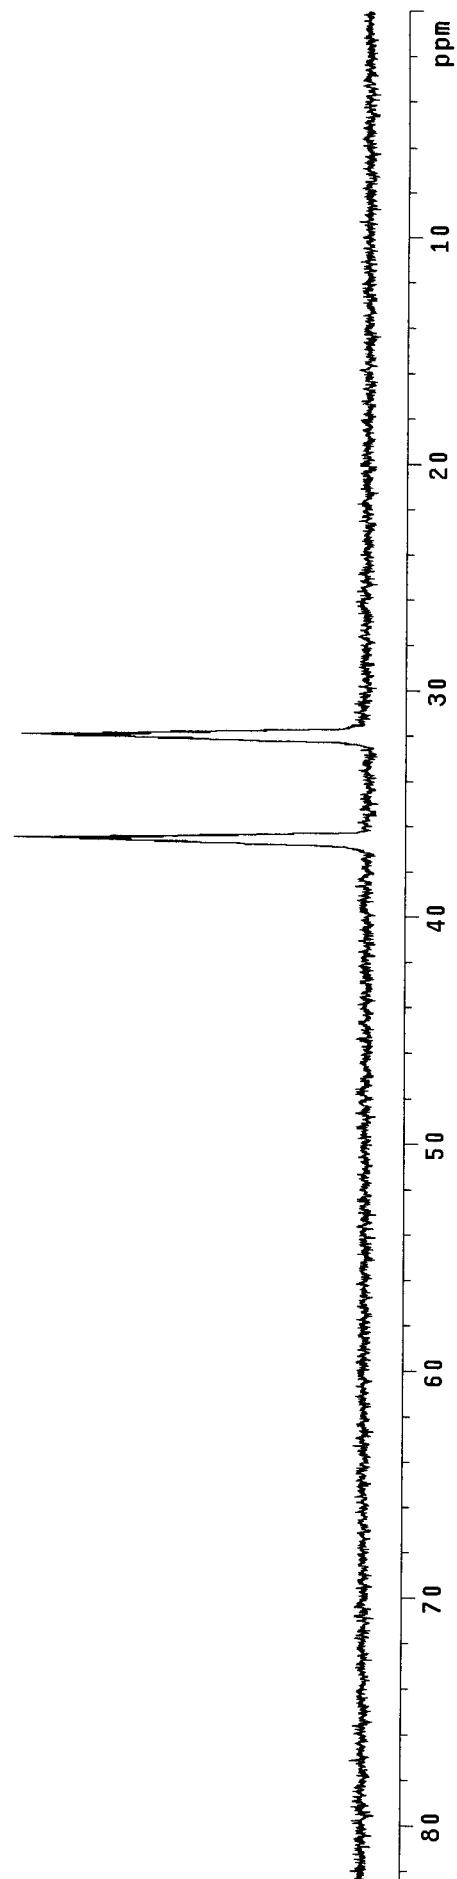

# <sup>1</sup>H-NMR

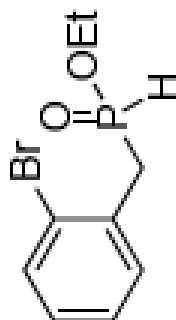

**4 (Scheme 4)**

| INDEX | FREQUENCY | PPM   | HEIGHT | INDEX | FREQUENCY | PPM   | HEIGHT |
|-------|-----------|-------|--------|-------|-----------|-------|--------|
| 1     | 2426.162  | 8.086 | 8.3    | 40    | 1039.532  | 3.465 | 14.1   |
| 2     | 2424.696  | 8.081 | 11.1   | 41    | 1037.187  | 3.457 | 10.8   |
| 3     | 2422.937  | 8.075 | 6.0    | 42    | 1024.875  | 3.416 | 13.5   |
| 4     | 2280.463  | 7.600 | 11.6   | 43    | 1019.598  | 3.398 | 11.5   |
| 5     | 2272.548  | 7.574 | 12.5   | 44    | 1017.253  | 3.390 | 9.8    |
| 6     | 2205.709  | 7.351 | 5.1    | 45    | 405.728   | 1.352 | 9.0    |
| 7     | 2203.070  | 7.342 | 5.0    | 46    | 403.080   | 1.343 | 35.6   |
| 8     | 2200.139  | 7.333 | 13.2   | 47    | 398.693   | 1.329 | 15.1   |
| 9     | 2197.793  | 7.325 | 24.0   | 48    | 396.054   | 1.320 | 65.4   |
| 10    | 2196.034  | 7.319 | 16.0   | 49    | 391.657   | 1.305 | 8.0    |
| 11    | 2189.878  | 7.298 | 12.6   | 50    | 388.725   | 1.296 | 32.6   |
| 12    | 2152.647  | 7.174 | 6.9    | 51    | 378.465   | 1.261 | 5.9    |
| 13    | 2147.370  | 7.157 | 6.2    |       |           |       |        |
| 14    | 2146.198  | 7.153 | 7.4    |       |           |       |        |
| 15    | 2145.318  | 7.150 | 7.5    |       |           |       |        |
| 16    | 1873.269  | 6.243 | 7.5    |       |           |       |        |
| 17    | 1872.683  | 6.241 | 8.0    |       |           |       |        |
| 18    | 1871.803  | 6.238 | 8.4    |       |           |       |        |
| 19    | 1871.217  | 6.236 | 10.7   |       |           |       |        |
| 20    | 1869.458  | 6.230 | 6.1    |       |           |       |        |
| 21    | 1260.279  | 4.200 | 4.8    |       |           |       |        |
| 22    | 1258.520  | 4.194 | 5.0    |       |           |       |        |
| 23    | 1257.348  | 4.190 | 6.9    |       |           |       |        |
| 24    | 1256.761  | 4.188 | 6.0    |       |           |       |        |
| 25    | 1251.485  | 4.171 | 5.6    |       |           |       |        |
| 26    | 1250.312  | 4.167 | 7.6    |       |           |       |        |
| 27    | 1249.726  | 4.165 | 6.7    |       |           |       |        |
| 28    | 1248.260  | 4.160 | 6.1    |       |           |       |        |
| 29    | 1241.224  | 4.137 | 6.1    |       |           |       |        |
| 30    | 1240.638  | 4.135 | 6.2    |       |           |       |        |
| 31    | 1229.498  | 4.098 | 6.2    |       |           |       |        |
| 32    | 1228.912  | 4.096 | 6.0    |       |           |       |        |
| 33    | 1222.462  | 4.074 | 7.1    |       |           |       |        |
| 34    | 1221.876  | 4.072 | 6.8    |       |           |       |        |
| 35    | 1220.703  | 4.068 | 6.6    |       |           |       |        |
| 36    | 1220.117  | 4.066 | 6.6    |       |           |       |        |
| 37    | 1213.667  | 4.045 | 6.4    |       |           |       |        |
| 38    | 1213.081  | 4.043 | 6.6    |       |           |       |        |
| 39    | 1043.344  | 3.477 | 13.3   |       |           |       |        |

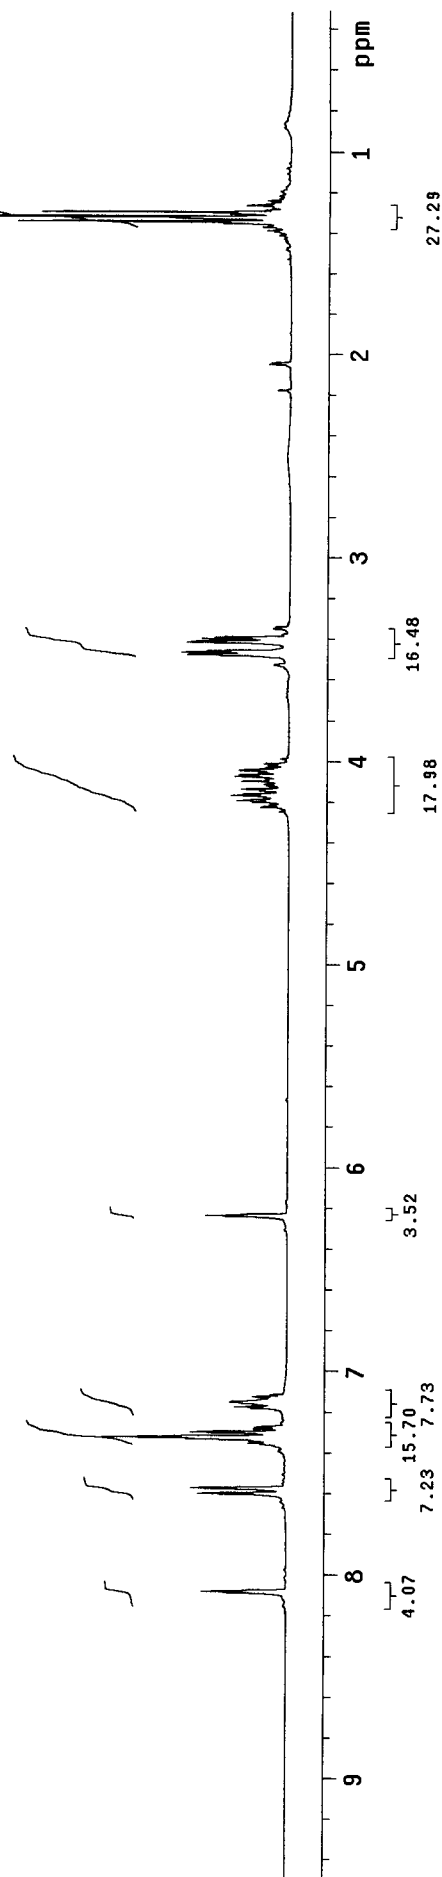

# <sup>13</sup>C-NMR

| INDEX | FREQUENCY | PPM     | HEIGHT |
|-------|-----------|---------|--------|
| 1     | 10049.710 | 133.201 | 35.9   |
| 2     | 10046.256 | 133.155 | 34.5   |
| 3     | 9970.250  | 132.148 | 34.3   |
| 4     | 9964.492  | 132.071 | 32.8   |
| 5     | 9861.423  | 130.705 | 9.9    |
| 6     | 9855.937  | 130.606 | 8.9    |
| 7     | 9748.565  | 129.209 | 37.3   |
| 8     | 9744.535  | 129.156 | 35.1   |
| 9     | 9666.225  | 128.118 | 36.5   |
| 10    | 9662.771  | 128.072 | 33.1   |
| 11    | 9421.797  | 124.878 | 9.4    |
| 12    | 9414.311  | 124.779 | 9.6    |
| 13    | 5876.000  | 77.882  | 12.0   |
| 14    | 5844.043  | 77.458  | 12.5   |
| 15    | 5811.798  | 77.031  | 11.6   |
| 16    | 4758.365  | 63.068  | 18.2   |
| 17    | 4751.456  | 62.977  | 19.2   |
| 18    | 2861.093  | 37.921  | 37.6   |
| 19    | 2772.132  | 36.742  | 36.9   |
| 20    | 1242.222  | 16.465  | 23.1   |
| 21    | 1236.176  | 16.385  | 22.5   |

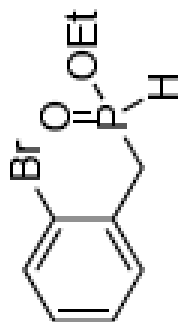

**4** (Scheme 4)

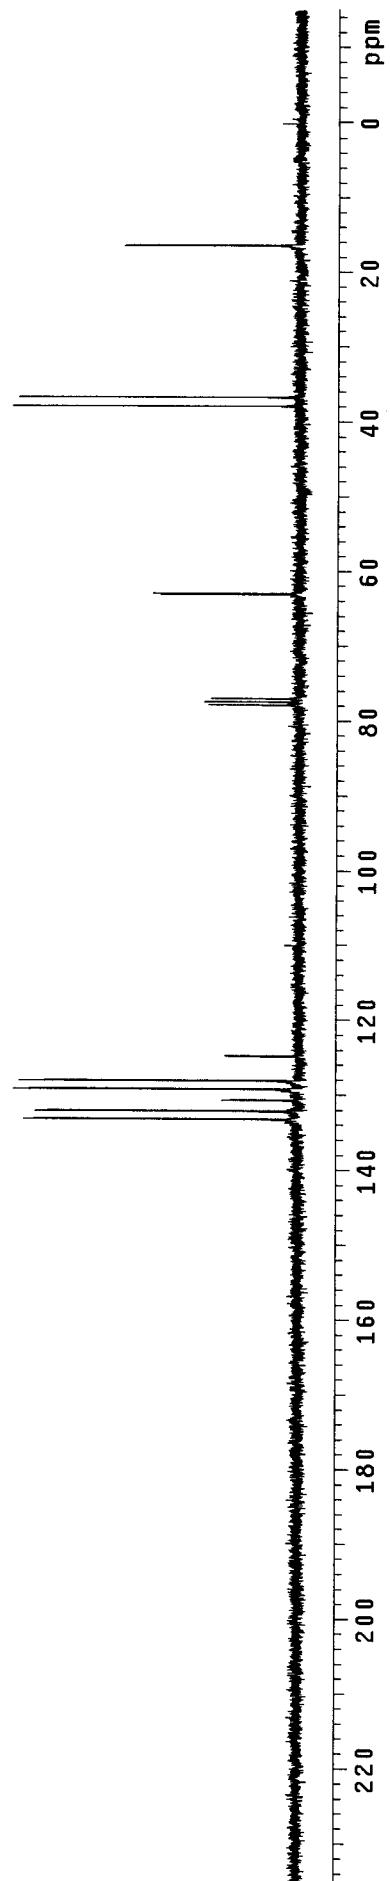

| INDEX | FREQUENCY | PPM    | HEIGHT |
|-------|-----------|--------|--------|
| 1     | 6265.069  | 51.580 | 71.4   |
| 2     | 6147.976  | 50.616 | 55.7   |

<sup>31</sup>P-NMR (<sup>1</sup>H decoupled)

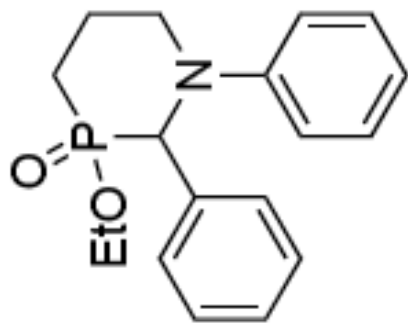

Table 1, entry 1

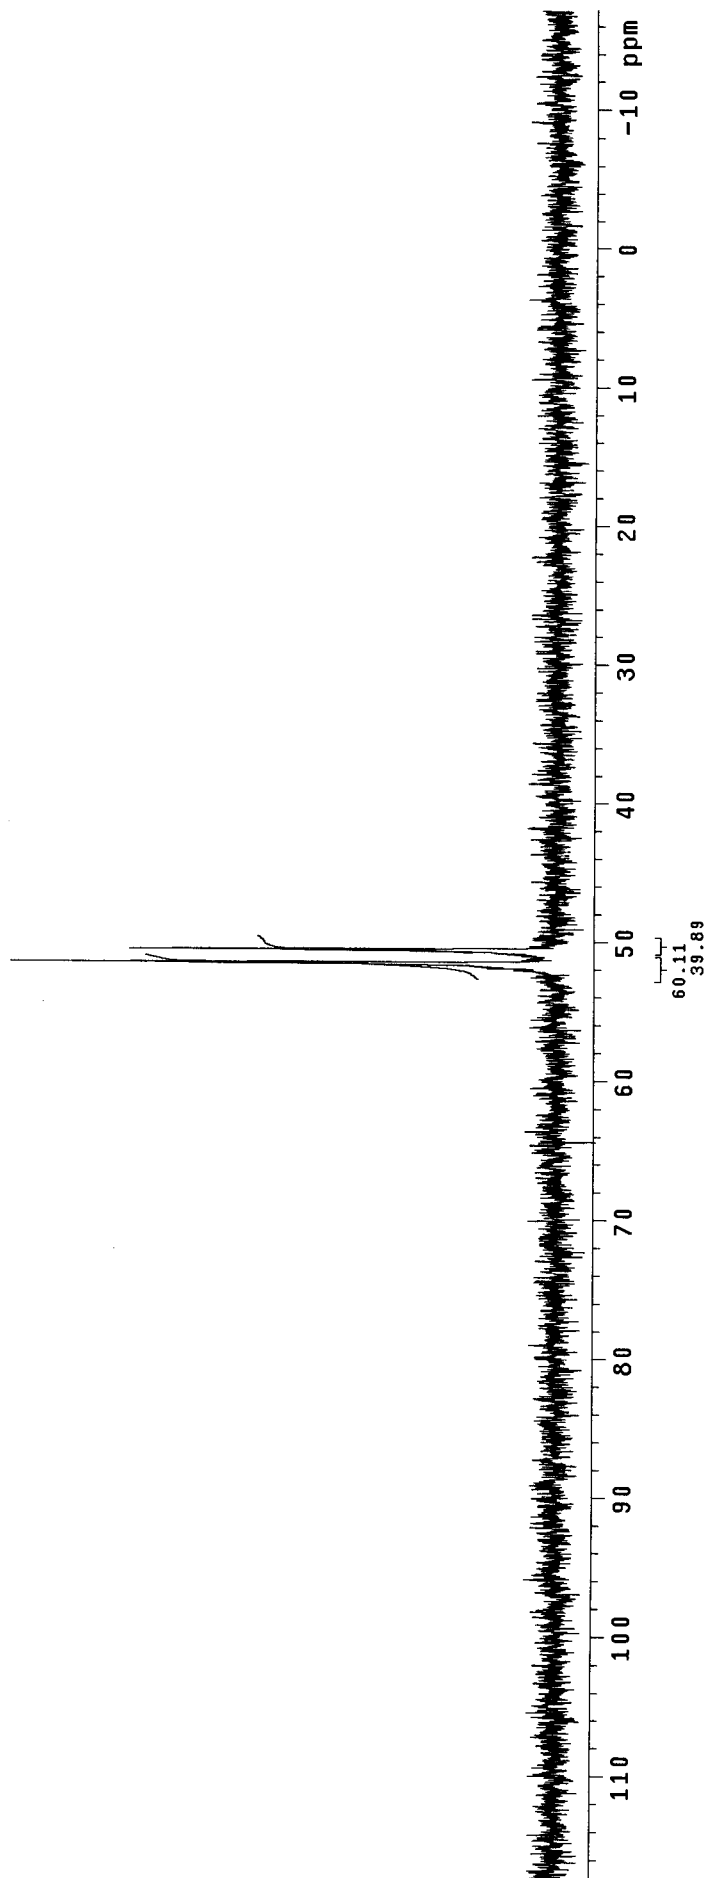



| INDEX | FREQUENCY | PPM    | HEIGHT |
|-------|-----------|--------|--------|
| 1     | 6261.397  | 51.550 | 16.6   |
| 2     | 6152.464  | 50.653 | 14.8   |

<sup>31</sup>P-NMR (1H coupled)

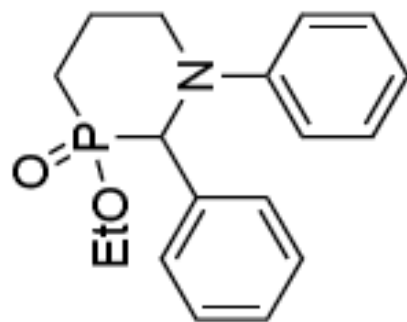

Table 1, entry 1

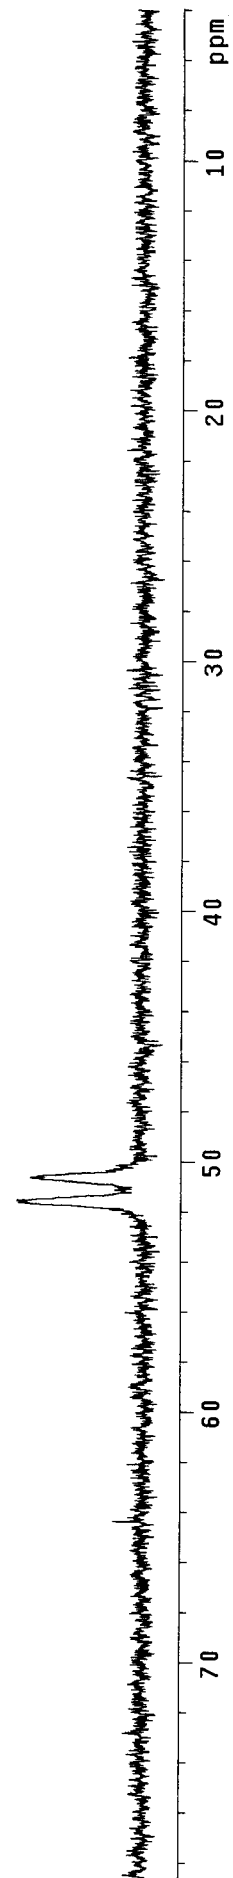

# <sup>1</sup>H-NMR

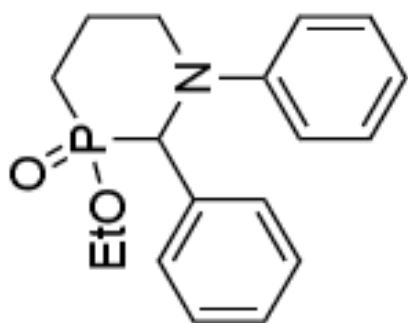

Table 1, entry 1

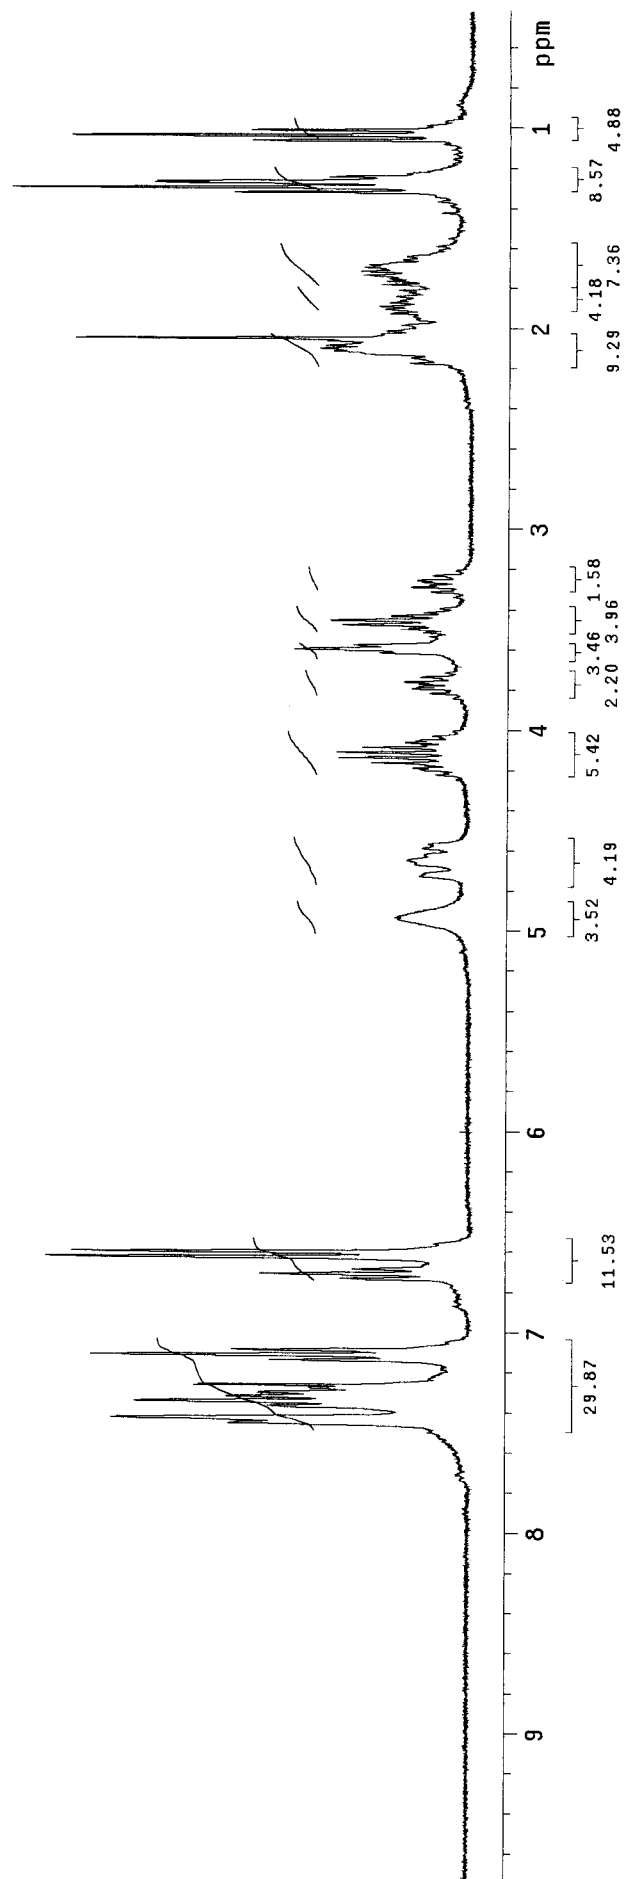

# <sup>13</sup>C-NMR

| INDEX | FREQUENCY | PPM     | HEIGHT |
|-------|-----------|---------|--------|
| 1     | 11047.290 | 146.423 | 6.7    |
| 2     | 10259.591 | 135.982 | 7.6    |
| 3     | 9769.006  | 129.480 | 70.2   |
| 4     | 9749.717  | 128.225 | 28.7   |
| 5     | 9730.427  | 128.969 | 27.6   |
| 6     | 9676.878  | 128.259 | 26.3   |
| 7     | 9672.559  | 128.202 | 24.3   |
| 8     | 9643.769  | 127.820 | 24.5   |
| 9     | 9638.875  | 127.755 | 22.7   |
| 10    | 8967.776  | 118.861 | 27.8   |
| 11    | 8626.612  | 114.339 | 44.7   |
| 12    | 8620.567  | 114.259 | 45.7   |
| 13    | 5864.196  | 77.725  | 37.9   |
| 14    | 5832.239  | 77.302  | 40.6   |
| 15    | 5800.282  | 76.878  | 39.1   |
| 16    | 4712.589  | 62.462  | 9.3    |
| 17    | 4705.967  | 62.374  | 9.6    |
| 18    | 4688.405  | 62.141  | 9.1    |
| 19    | 4681.496  | 62.049  | 11.1   |
| 20    | 4421.808  | 58.607  | 9.0    |
| 21    | 4404.822  | 58.382  | 12.1   |
| 22    | 4329.104  | 57.379  | 10.5   |
| 23    | 4308.375  | 57.104  | 9.4    |
| 24    | 3426.820  | 45.420  | 11.3   |
| 25    | 3421.350  | 45.347  | 10.7   |
| 26    | 3410.122  | 45.198  | 11.7   |
| 27    | 3404.364  | 45.122  | 13.1   |
| 28    | 1962.264  | 26.008  | 8.8    |
| 29    | 1906.124  | 25.264  | 11.1   |
| 30    | 1881.652  | 24.940  | 21.7   |
| 31    | 1868.408  | 24.764  | 12.2   |
| 32    | 1785.781  | 23.669  | 11.4   |
| 33    | 1281.089  | 16.980  | 9.4    |
| 34    | 1275.907  | 16.911  | 9.5    |
| 35    | 1253.738  | 16.617  | 9.0    |
| 36    | 1089.922  | 14.446  | 6.4    |
| 37    | 18.352    | 0.243   | 7.9    |

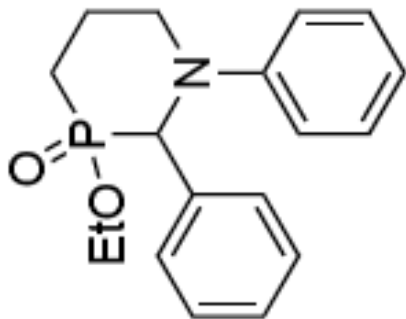

Table 1, entry 1

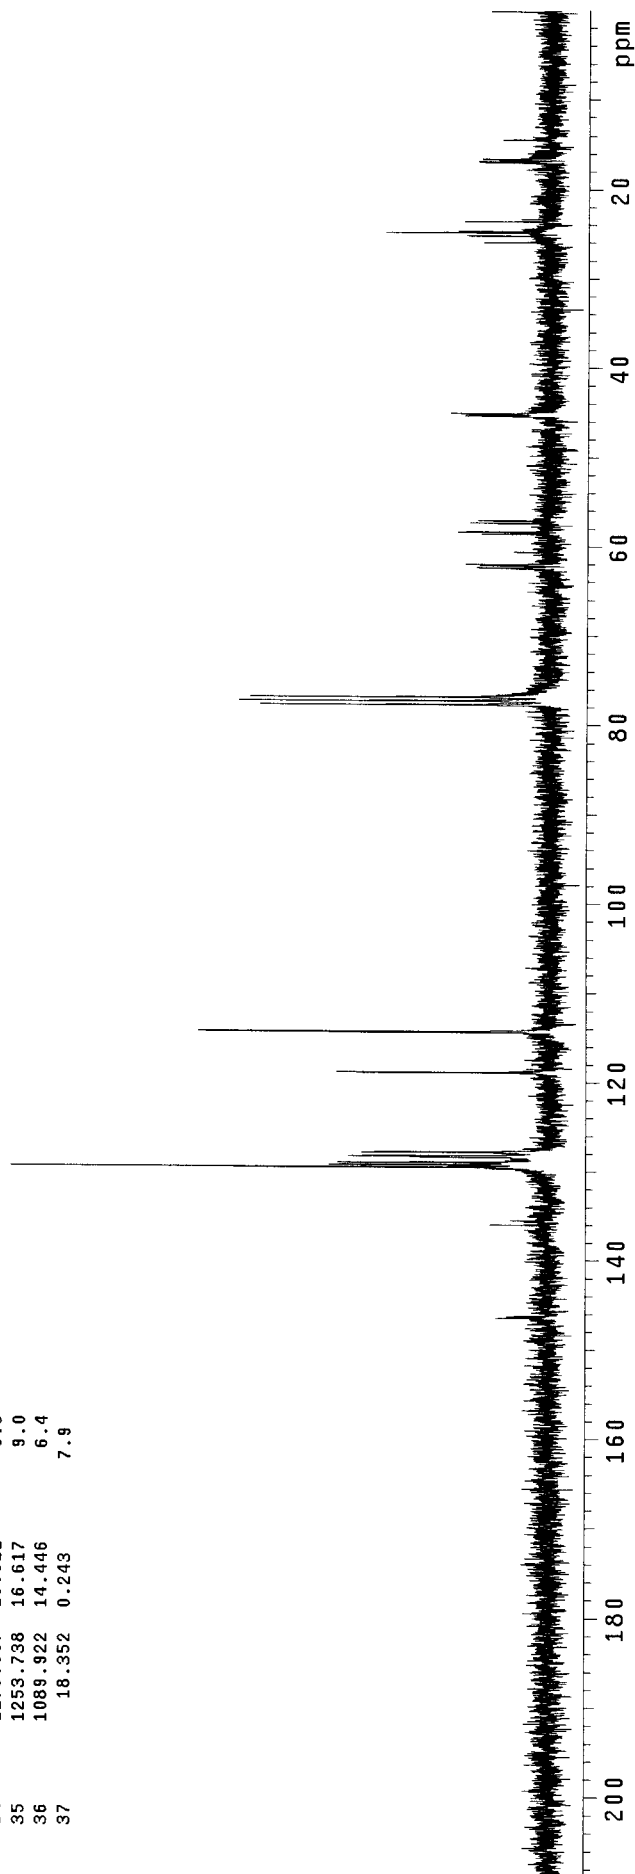

| INDEX | FREQUENCY PPM | HEIGHT |
|-------|---------------|--------|
| 1     | 5372.389      | 44.231 |
|       |               | 60.0   |

<sup>31</sup>P-NMR (<sup>1</sup>H decoupled)

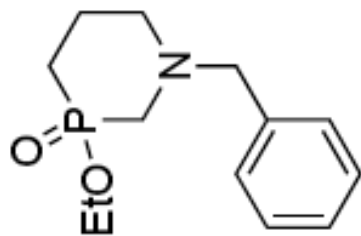

Table 1, entry 2

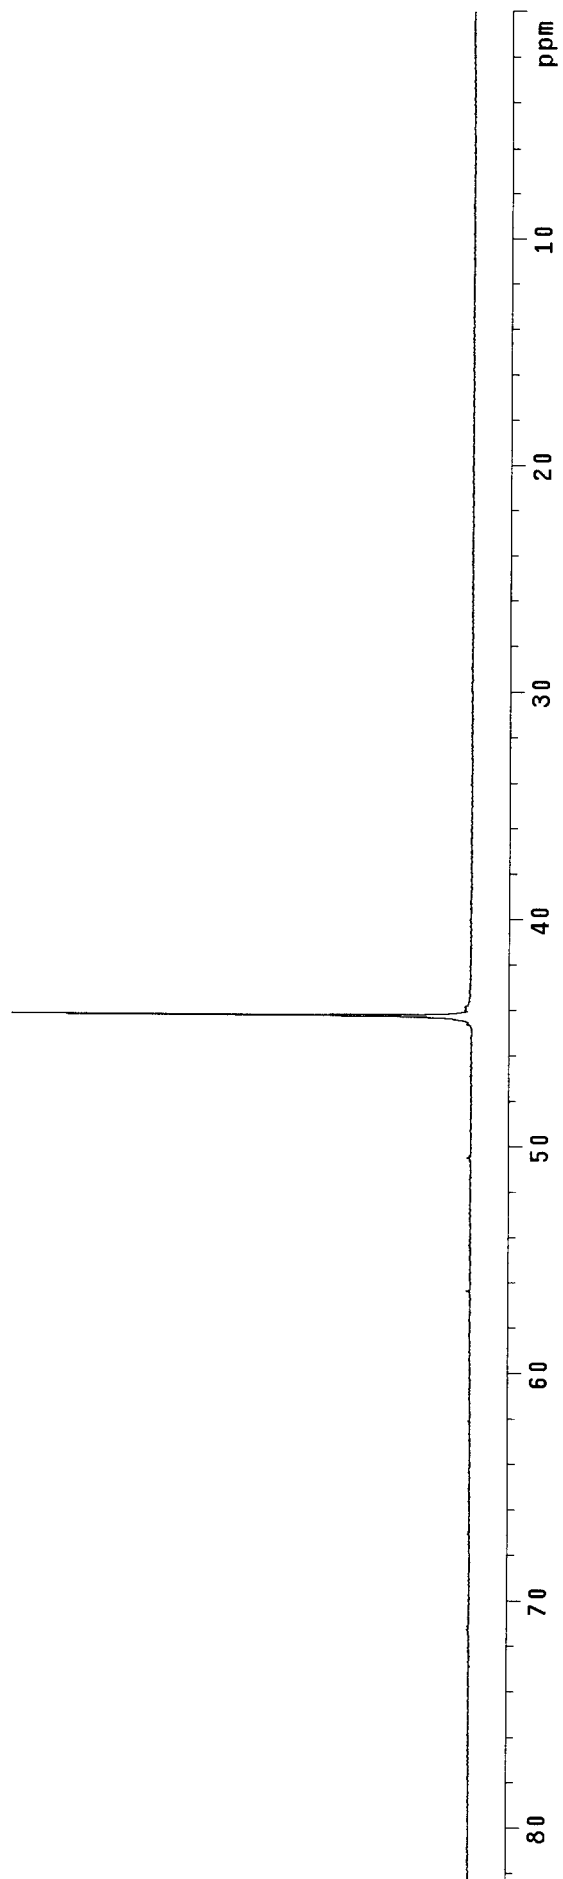

| INDEX | FREQUENCY | PPM    | HEIGHT |
|-------|-----------|--------|--------|
| 1     | 5380.548  | 44.298 | 38.6   |

<sup>31</sup>P-NMR (<sup>1</sup>H coupled)

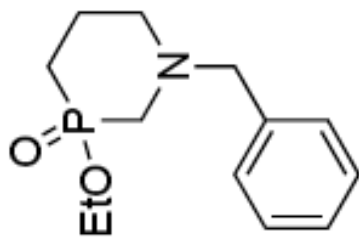

Table 1, entry 2

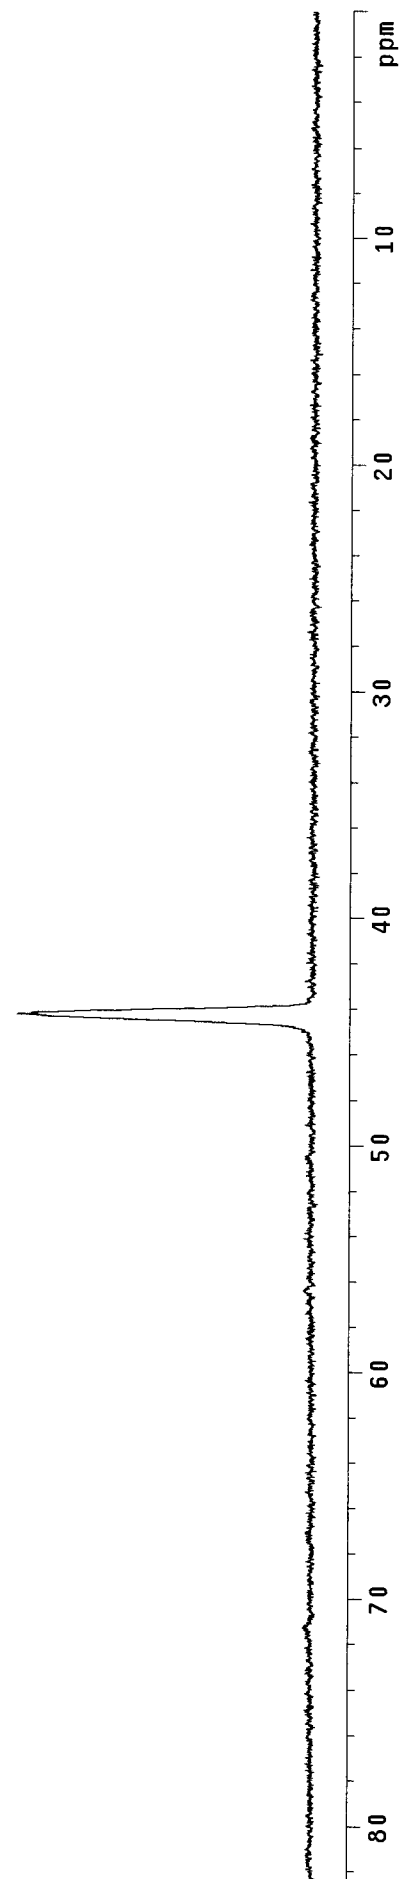

# <sup>1</sup>H-NMR

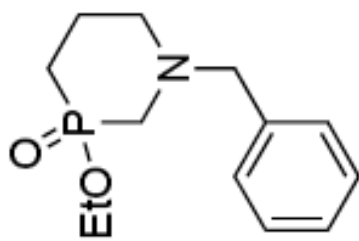

Table 1, entry 2

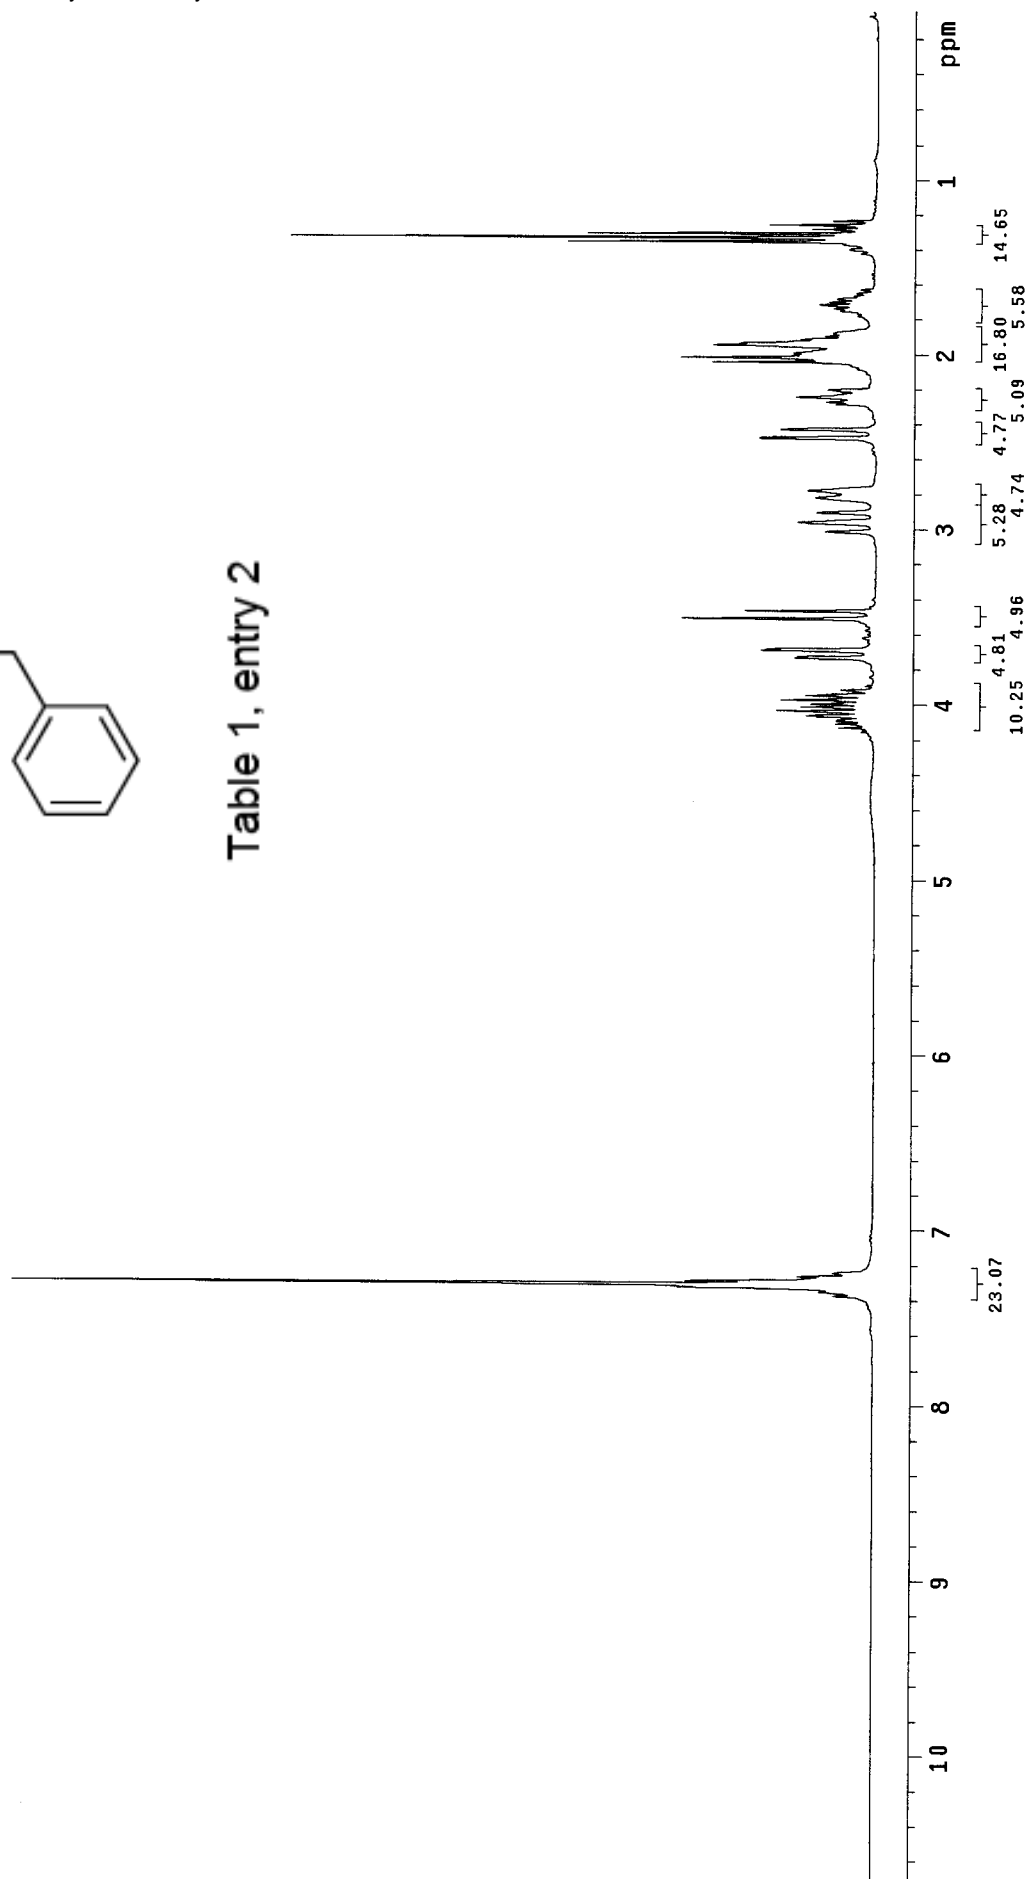

### <sup>13</sup>C-NMR

| INDEX | FREQUENCY | PPM     | HEIGHT |
|-------|-----------|---------|--------|
| 1     | 10364.387 | 137.371 | 15.3   |
| 2     | 9747.414  | 129.194 | 86.2   |
| 3     | 9682.424  | 128.465 | 87.2   |
| 4     | 9625.919  | 127.584 | 43.5   |
| 5     | 5889.243  | 78.057  | 6.0    |
| 6     | 5856.998  | 77.630  | 6.6    |
| 7     | 5824.753  | 77.202  | 6.4    |
| 8     | 4870.835  | 64.560  | 22.1   |
| 9     | 4855.388  | 64.354  | 22.6   |
| 10    | 4559.138  | 60.428  | 16.9   |
| 11    | 4552.516  | 60.340  | 17.2   |
| 12    | 4093.025  | 54.250  | 23.0   |
| 13    | 4088.130  | 54.185  | 23.9   |
| 14    | 3987.365  | 52.849  | 21.1   |
| 15    | 3889.190  | 51.548  | 20.8   |
| 16    | 1976.947  | 26.203  | 21.2   |
| 17    | 1887.986  | 25.024  | 21.2   |
| 18    | 1769.082  | 23.448  | 22.3   |
| 19    | 1763.036  | 23.368  | 21.6   |
| 20    | 1265.542  | 16.774  | 16.5   |
| 21    | 1259.496  | 16.694  | 15.7   |

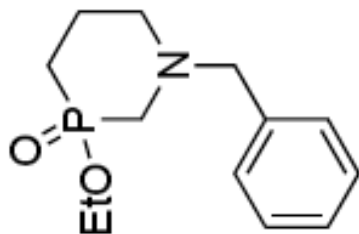

Table 1, entry 2

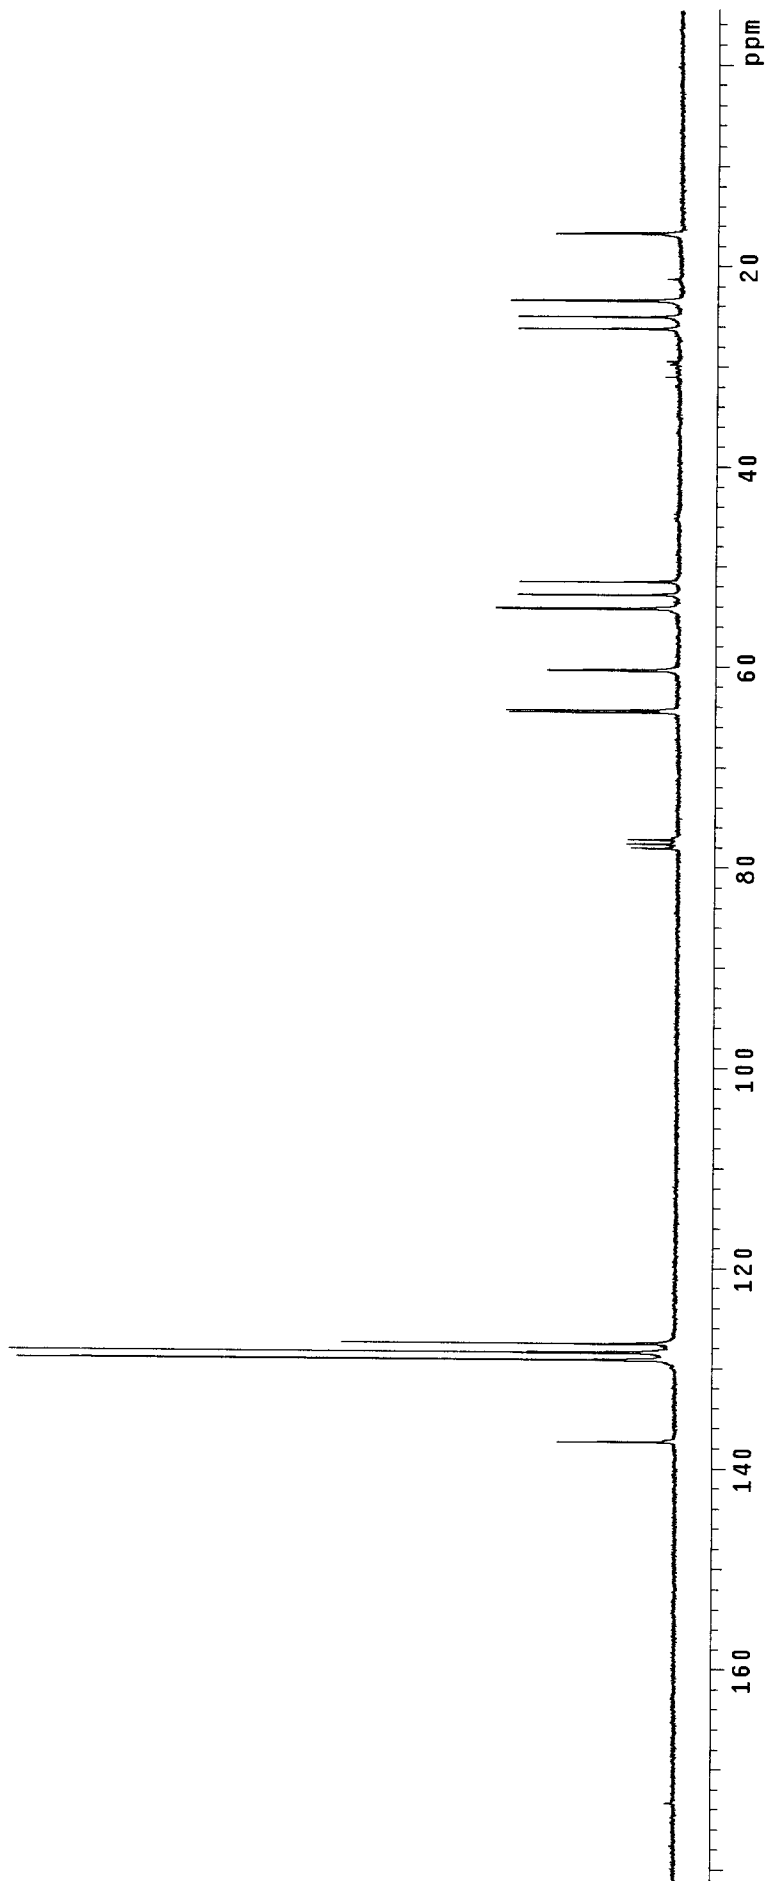

| INDEX | FREQUENCY | PPM    | HEIGHT |
|-------|-----------|--------|--------|
| 1     | 6303.828  | 51.899 | 123.1  |
| 2     | 6189.999  | 50.962 | 126.0  |

<sup>31</sup>P-NMR (<sup>1</sup>H decoupled)

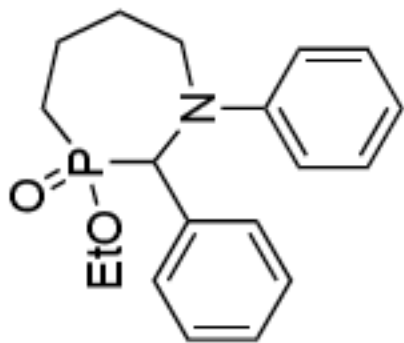

Table 1, entry 3

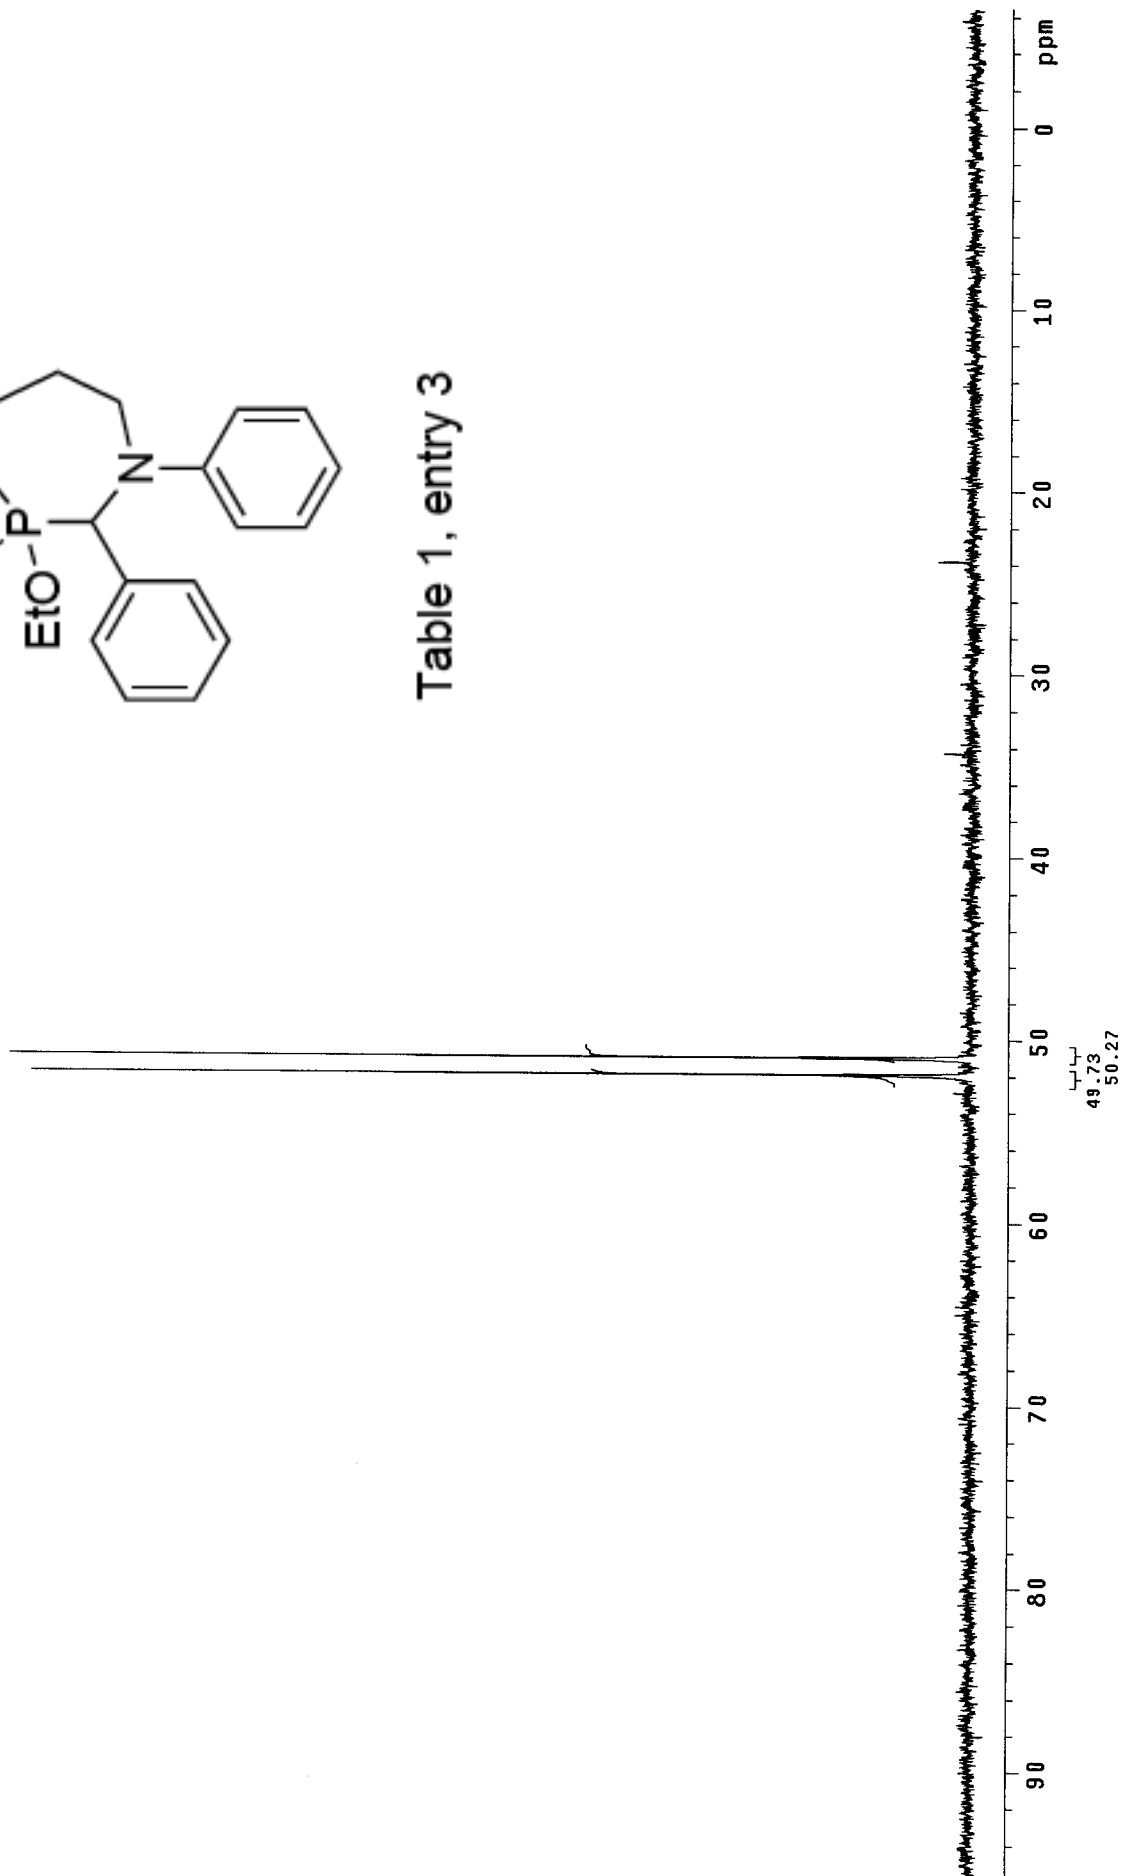



| INDEX | FREQUENCY | PPM    | HEIGHT |
|-------|-----------|--------|--------|
| 1     | 6312.803  | 51.973 | 33.3   |
| 2     | 6196.934  | 51.019 | 34.4   |

<sup>31</sup>P-NMR (<sup>1</sup>H coupled)

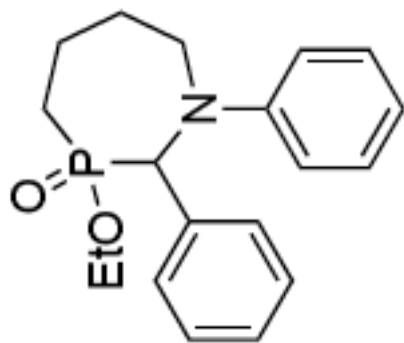

Table 1, entry 3

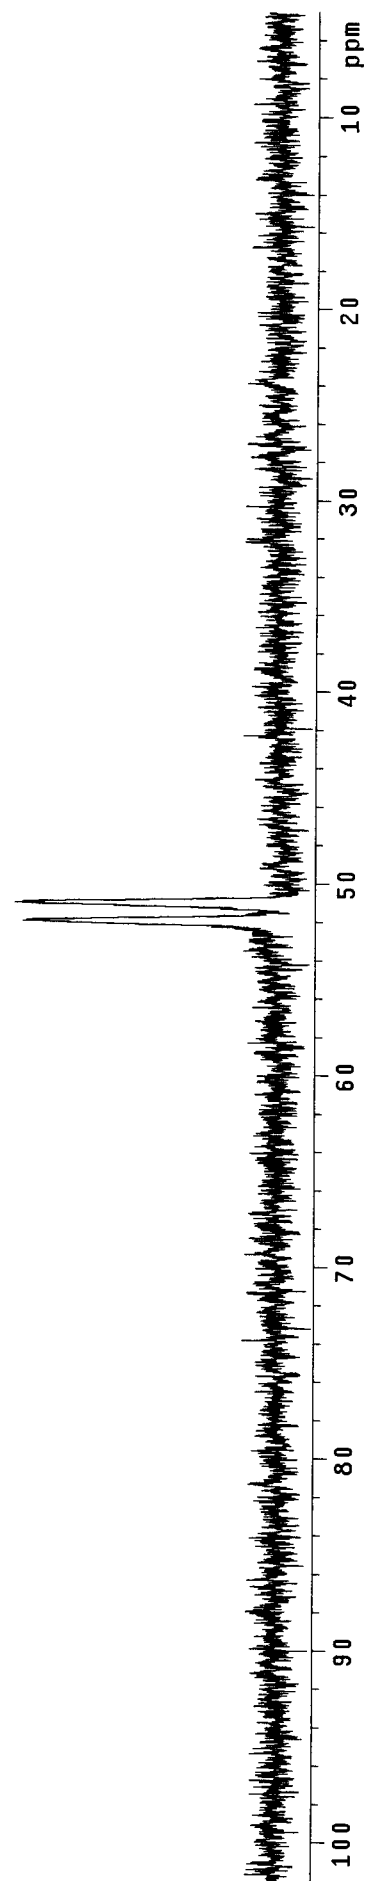

# <sup>1</sup>H-NMR

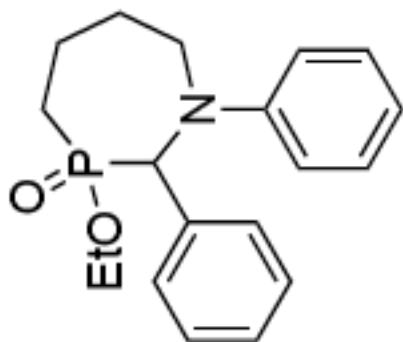

Table 1, entry 3

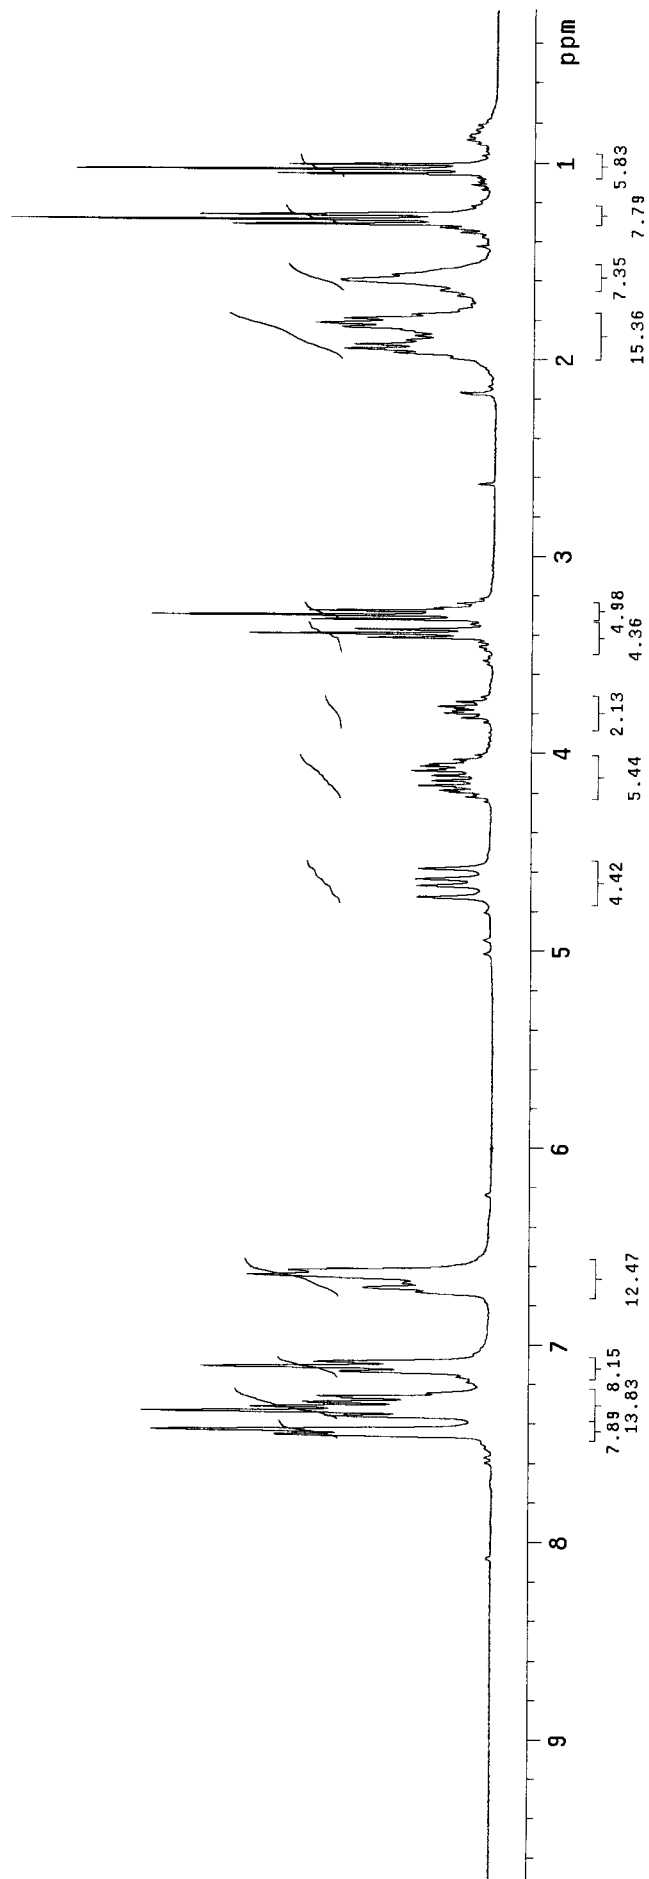

<sup>13</sup>C-NMR

| INDEX | FREQUENCY PPM | HEIGHT  | INDEX | FREQUENCY PPM | HEIGHT |
|-------|---------------|---------|-------|---------------|--------|
| 1     | 11039.516     | 146.320 | 9.7   | 1557.187      | 20.639 |
| 2     | 10267.652     | 136.089 | 13.1  | 1537.321      | 20.376 |
| 3     | 10231.376     | 135.608 | 9.7   | 1533.003      | 20.319 |
| 4     | 9767.279      | 129.457 | 147.9 | 1283.680      | 17.014 |
| 5     | 9746.550      | 129.183 | 88.6  | 1278.488      | 16.945 |
| 6     | 9744.247      | 129.152 | 86.6  | 1261.800      | 16.724 |
| 7     | 9727.836      | 128.935 | 81.5  | 1256.617      | 16.655 |
| 8     | 9725.821      | 128.908 | 82.2  |               |        |
| 9     | 9682.924      | 128.339 | 89.4  |               |        |
| 10    | 9678.605      | 128.282 | 95.6  |               |        |
| 11    | 9648.376      | 127.881 | 48.0  |               |        |
| 12    | 9643.769      | 127.820 | 46.8  |               |        |
| 13    | 8973.534      | 118.937 | 44.8  |               |        |
| 14    | 8632.083      | 114.411 | 64.0  |               |        |
| 15    | 8440.916      | 111.877 | 5.7   |               |        |
| 16    | 5872.545      | 77.836  | 68.0  |               |        |
| 17    | 5840.588      | 77.412  | 69.9  |               |        |
| 18    | 5808.343      | 76.985  | 67.8  |               |        |
| 19    | 4705.392      | 62.366  | 25.5  |               |        |
| 20    | 4698.482      | 62.275  | 27.2  |               |        |
| 21    | 4682.647      | 62.065  | 24.9  |               |        |
| 22    | 4675.450      | 61.969  | 25.0  |               |        |
| 23    | 4419.505      | 53.577  | 11.7  |               |        |
| 24    | 4400.216      | 58.321  | 10.9  |               |        |
| 25    | 4328.528      | 57.371  | 11.8  |               |        |
| 26    | 4305.208      | 57.062  | 10.6  |               |        |
| 27    | 2538.644      | 33.648  | 41.3  |               |        |
| 28    | 2535.477      | 33.606  | 38.1  |               |        |
| 29    | 2523.961      | 33.453  | 41.9  |               |        |
| 30    | 2521.369      | 33.419  | 41.2  |               |        |
| 31    | 2480.276      | 33.007  | 59.6  |               |        |
| 32    | 2483.366      | 32.915  | 64.3  |               |        |
| 33    | 2259.379      | 29.946  | 4.8   |               |        |
| 34    | 2230.589      | 29.565  | 6.7   |               |        |
| 35    | 2075.122      | 27.504  | 16.9  |               |        |
| 36    | 1996.813      | 26.466  | 18.0  |               |        |
| 37    | 1981.842      | 26.268  | 17.4  |               |        |
| 38    | 1801.517      | 25.203  | 17.1  |               |        |
| 39    | 1561.793      | 20.700  | 29.9  |               |        |

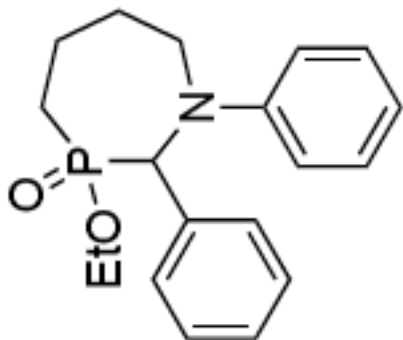

Table 1, entry 3

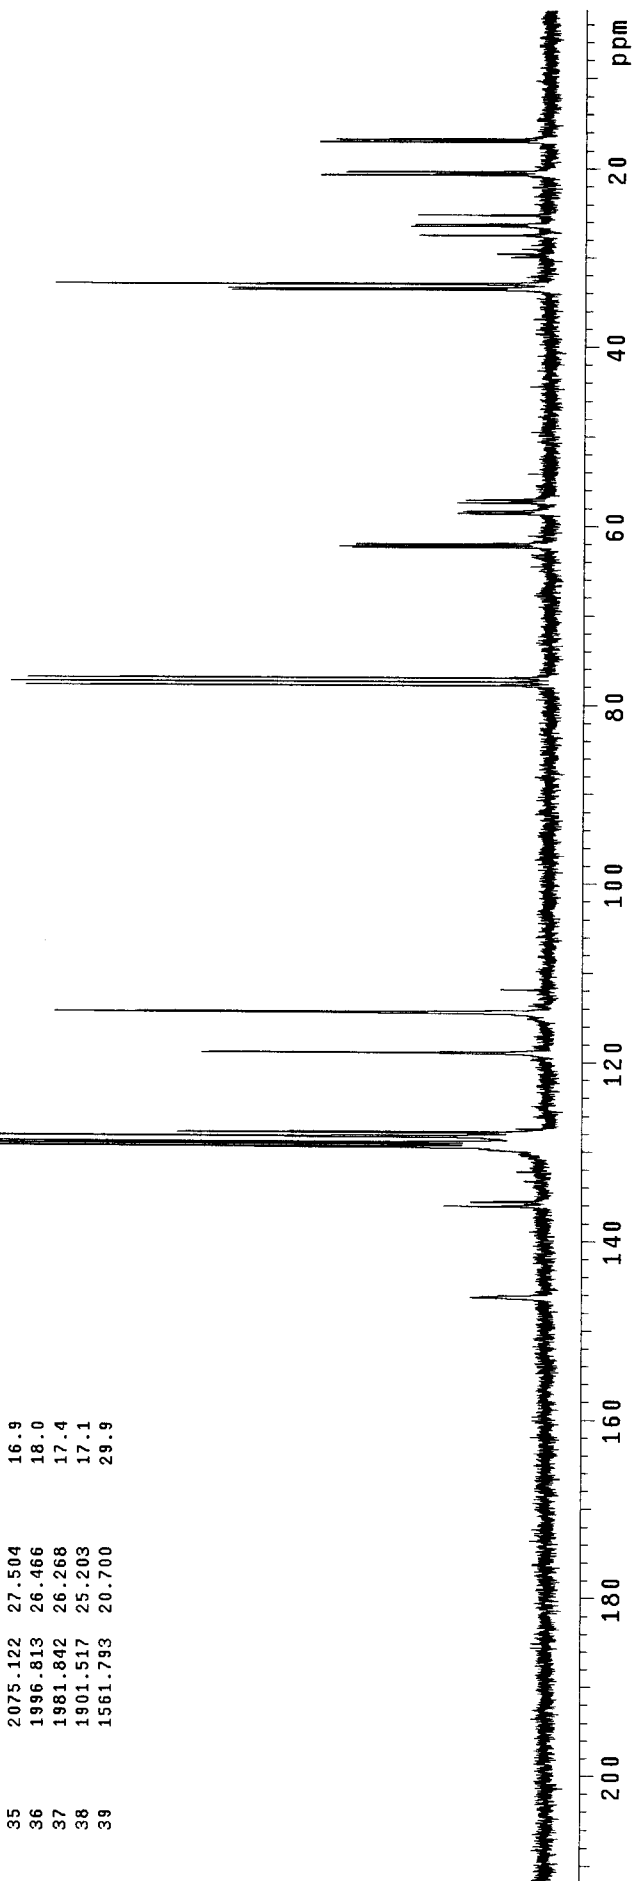

| INDEX | FREQUENCY | PPM    | HEIGHT |
|-------|-----------|--------|--------|
| 1     | 7660.391  | 63.068 | 86.1   |

<sup>31</sup>P-NMR (<sup>1</sup>H decoupled)

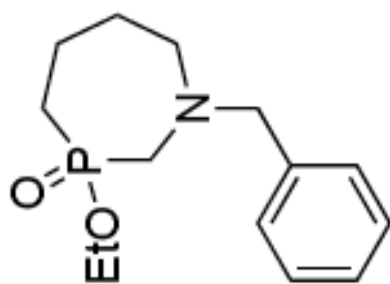

Table 1, entry 4

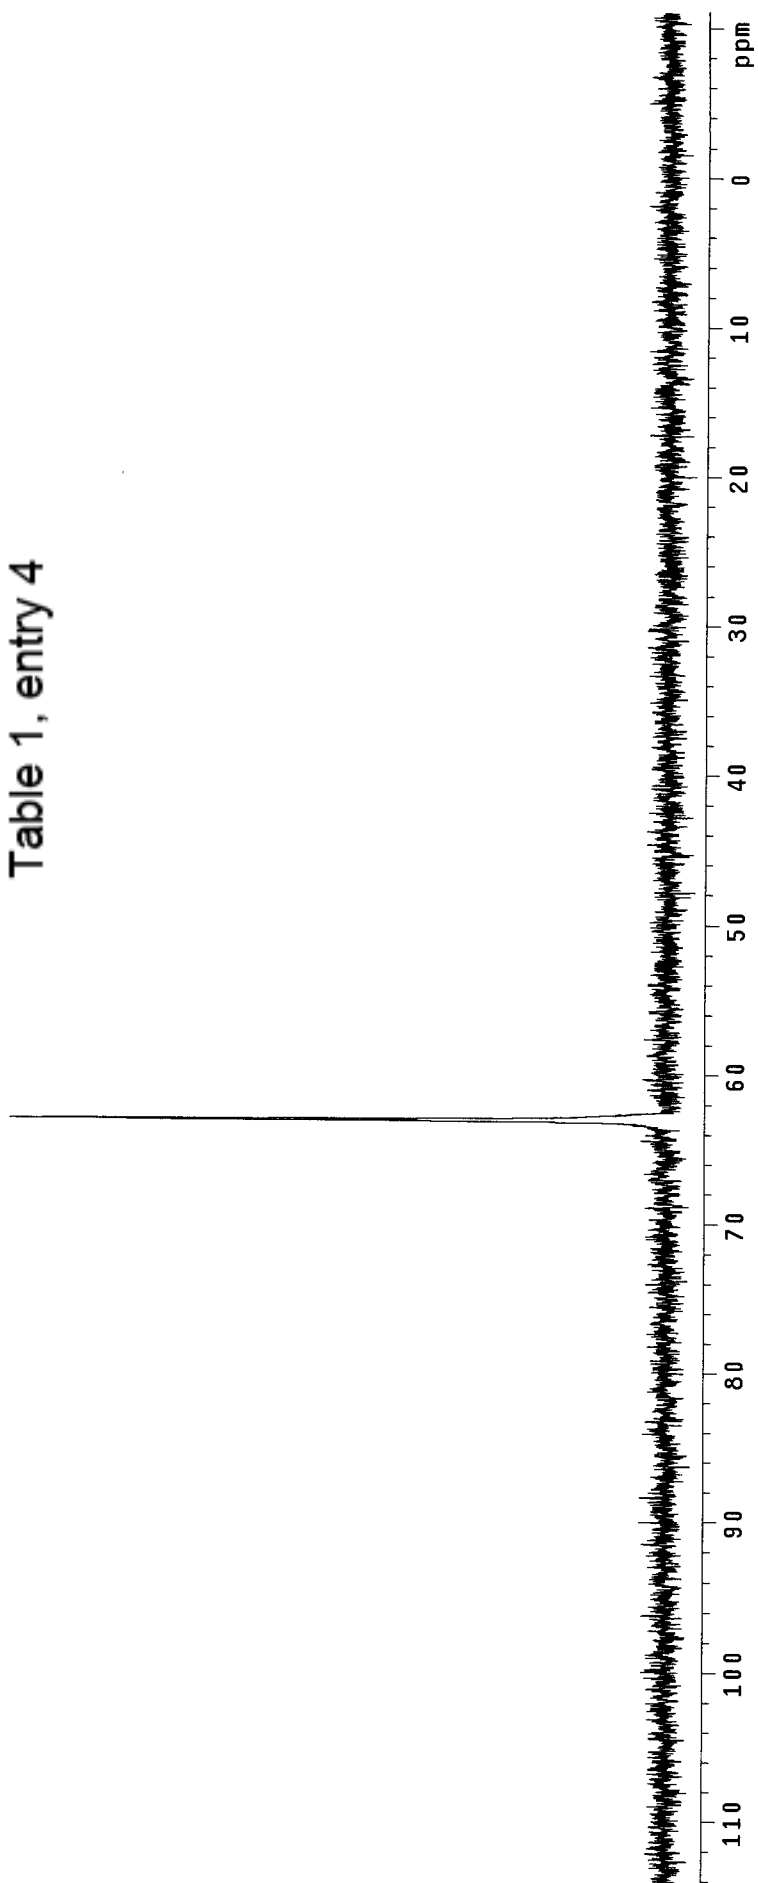

| INDEX | FREQUENCY | PPM    | HEIGHT |
|-------|-----------|--------|--------|
| 1     | 7664.879  | 63.105 | 30.3   |

<sup>31</sup>P-NMR (<sup>1</sup>H coupled)

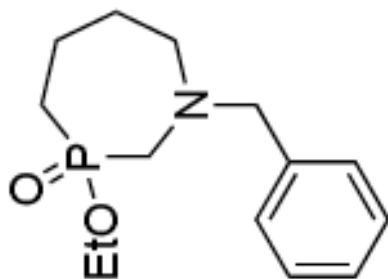

Table 1, entry 4

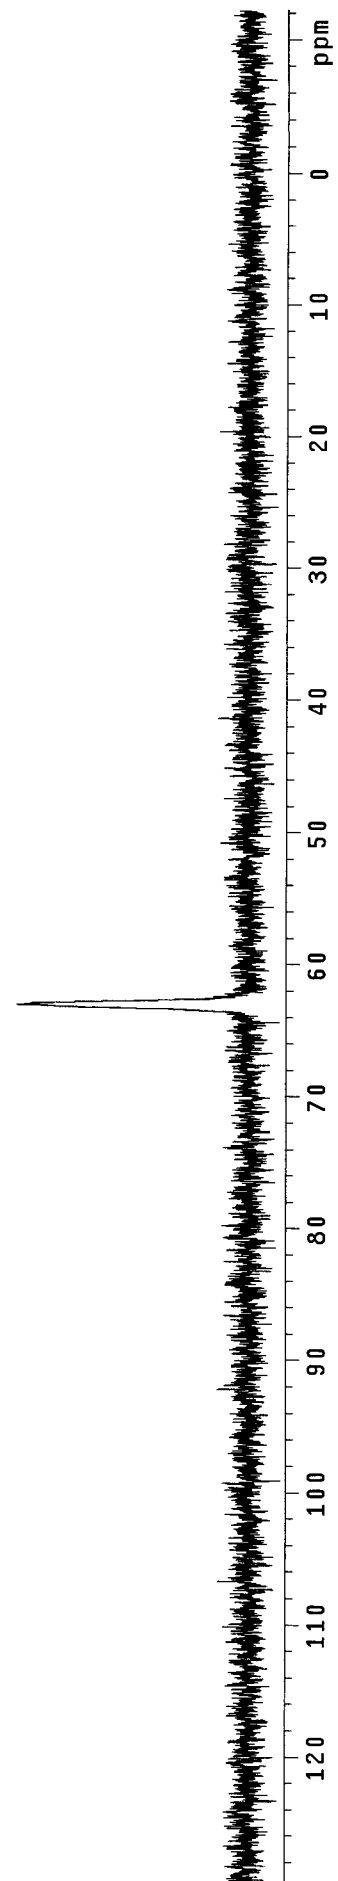

# <sup>1</sup>H-NMR

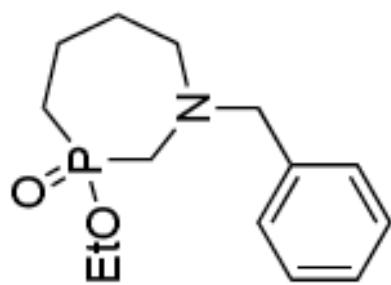

Table 1, entry 4

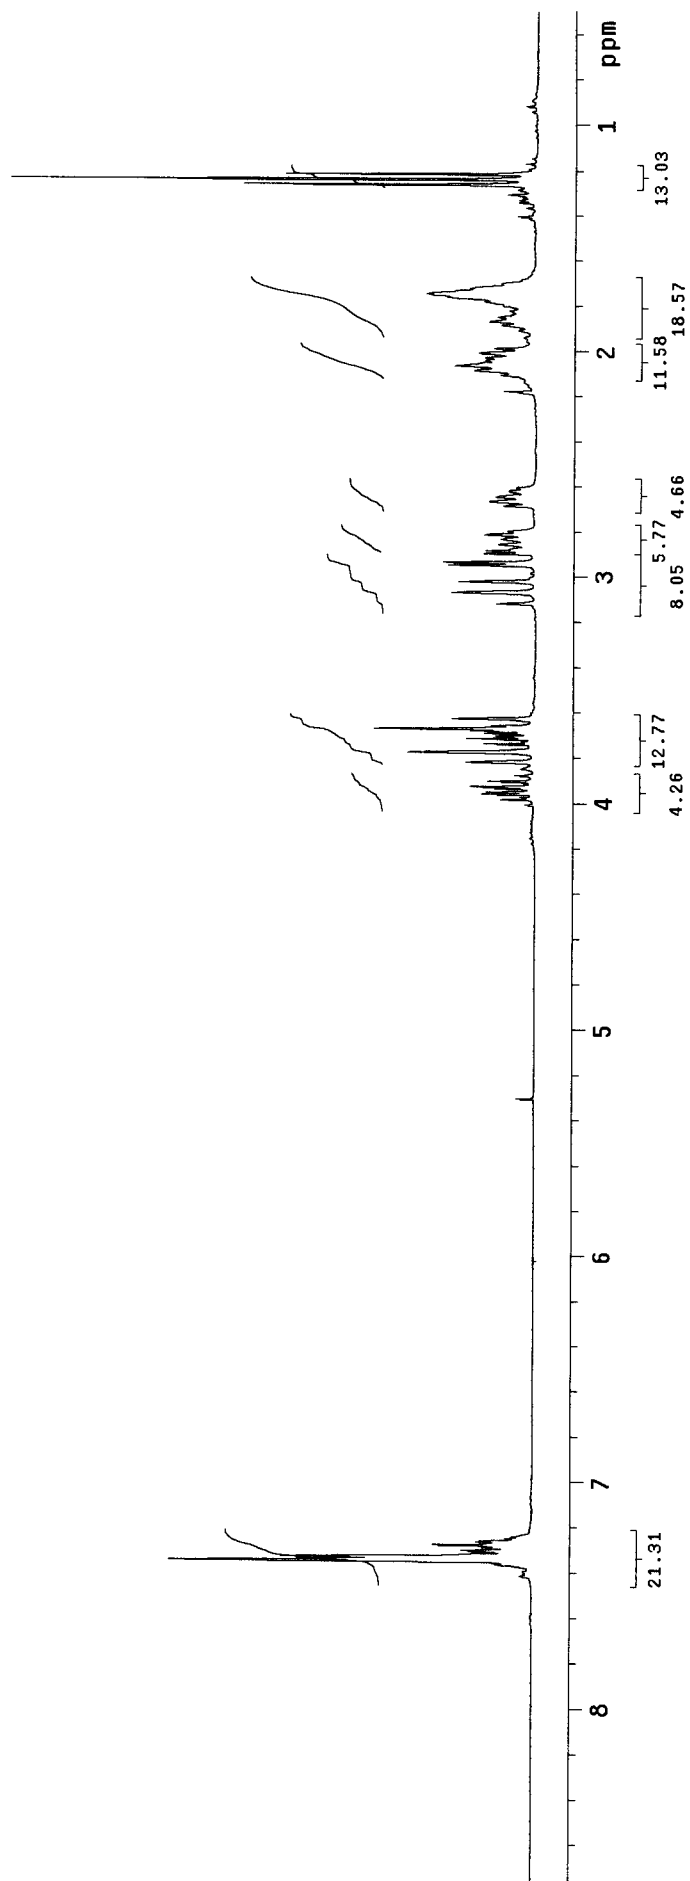

# <sup>13</sup>C-NMR

| INDEX | FREQUENCY | PPM     | HEIGHT |
|-------|-----------|---------|--------|
| 1     | 10465.153 | 138.707 | 22.5   |
| 2     | 9744.823  | 129.160 | 125.3  |
| 3     | 9693.864  | 128.484 | 130.9  |
| 4     | 9619.297  | 127.496 | 64.0   |
| 5     | 5880.318  | 77.939  | 10.6   |
| 6     | 5848.361  | 77.515  | 11.5   |
| 7     | 5816.116  | 77.088  | 11.8   |
| 8     | 4849.055  | 64.270  | 29.2   |
| 9     | 4833.220  | 64.060  | 30.2   |
| 10    | 4529.196  | 60.031  | 19.5   |
| 11    | 4522.574  | 59.943  | 21.4   |
| 12    | 4398.200  | 58.295  | 57.6   |
| 13    | 4166.152  | 55.219  | 27.7   |
| 14    | 4061.068  | 53.826  | 27.8   |
| 15    | 2276.941  | 30.179  | 54.3   |
| 16    | 2237.498  | 29.656  | 33.7   |
| 17    | 2223.679  | 29.473  | 8.1    |
| 18    | 2149.400  | 28.489  | 32.5   |
| 19    | 1508.819  | 19.998  | 36.9   |
| 20    | 1507.092  | 19.975  | 40.6   |
| 21    | 1264.966  | 16.766  | 21.0   |
| 22    | 1258.921  | 16.686  | 22.5   |

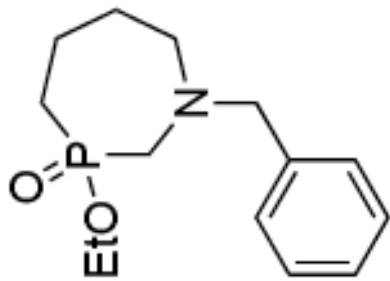

Table 1, entry 4

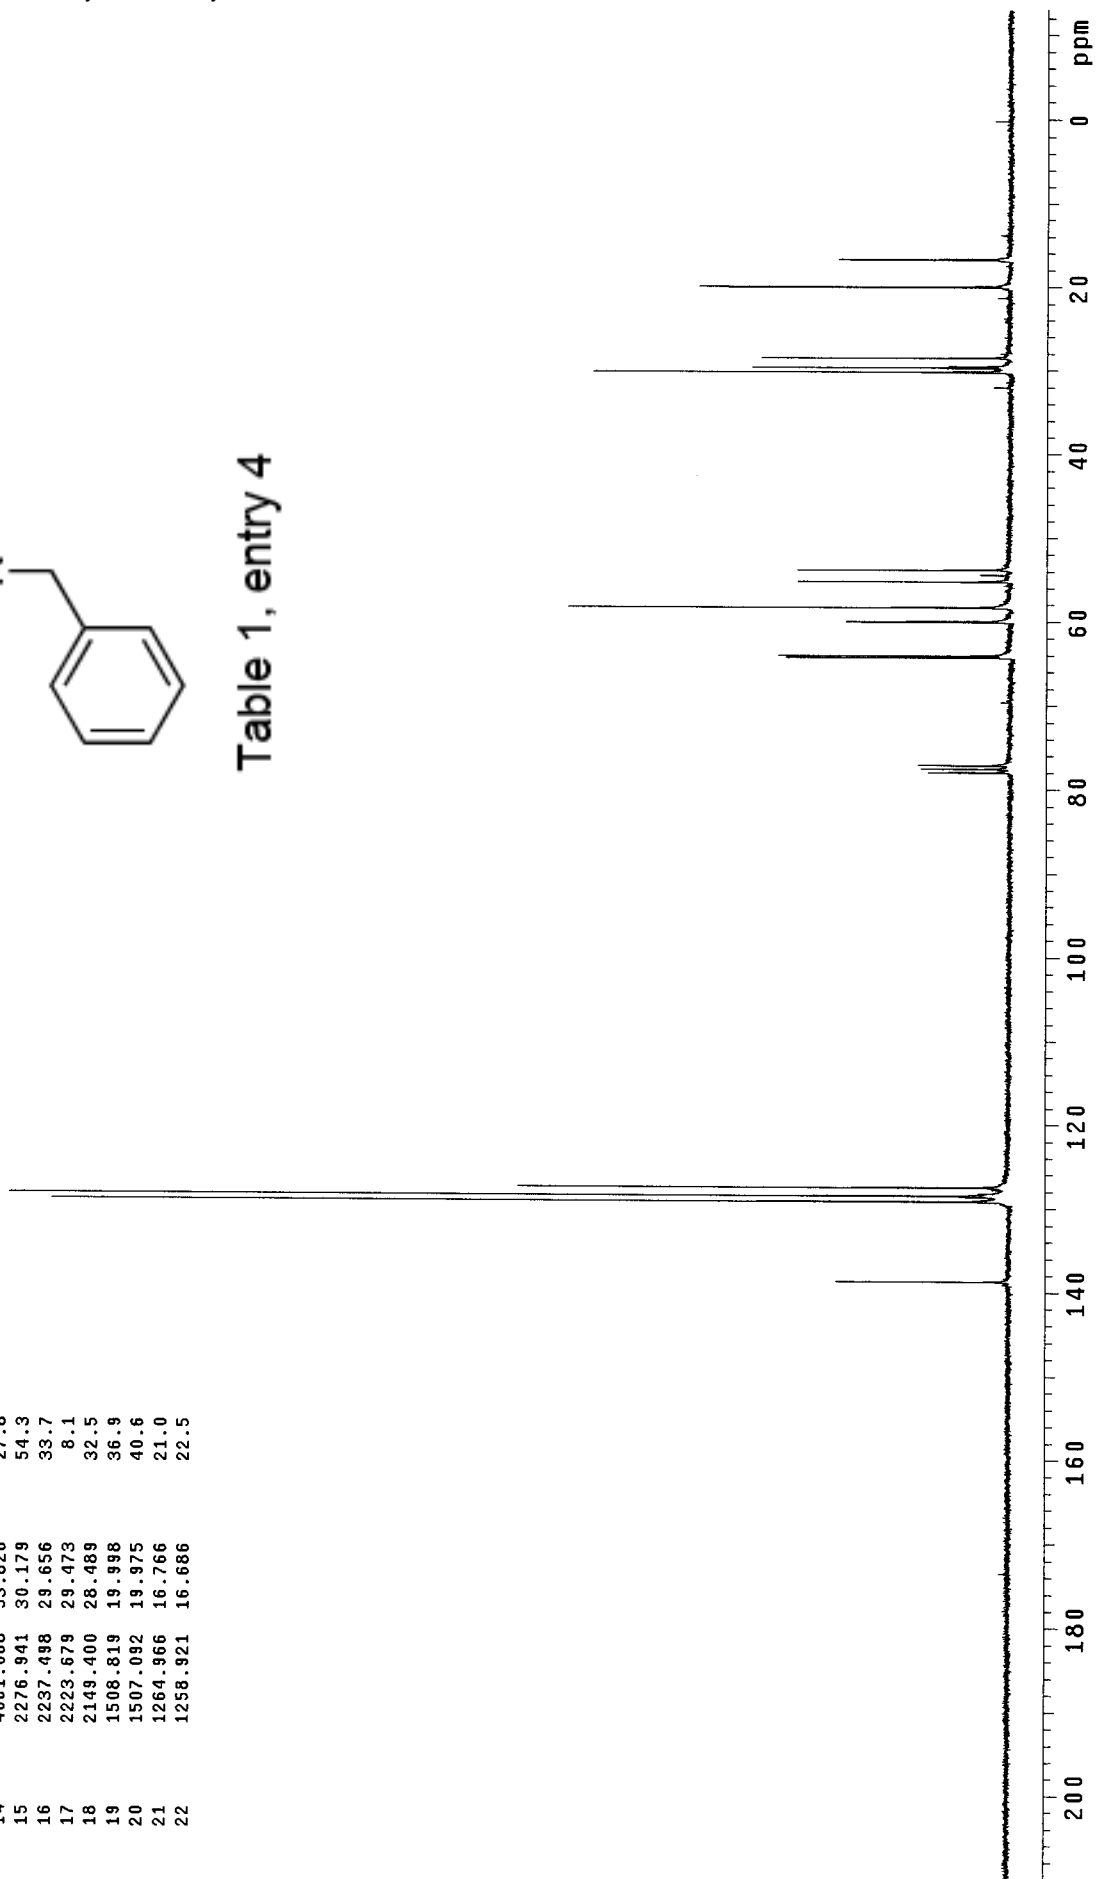

| INDEX | FREQUENCY | PPM    | HEIGHT |
|-------|-----------|--------|--------|
| 1     | 6148.384  | 50.619 | 52.3   |
| 2     | 5999.060  | 49.390 | 40.8   |

<sup>31</sup>P-NMR (<sup>1</sup>H decoupled)

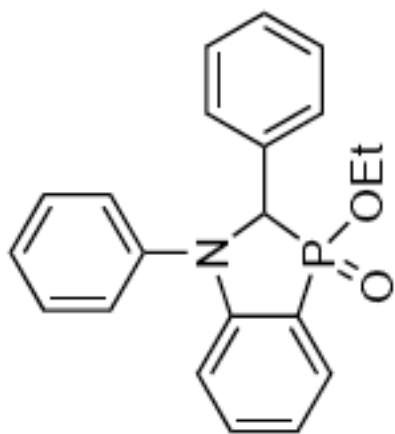

Table 2, entry 1

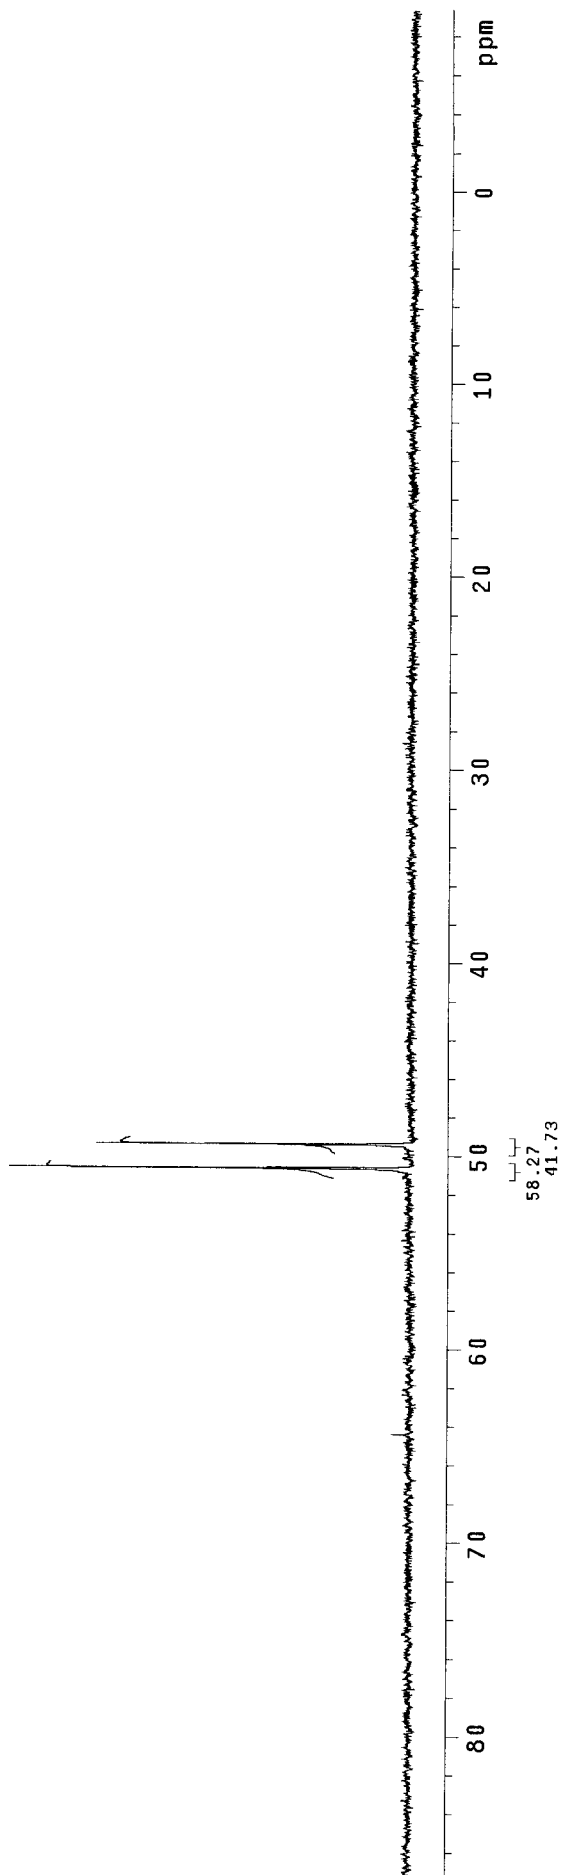



| INDEX | FREQUENCY | PPM    | HEIGHT |
|-------|-----------|--------|--------|
| 1     | 6146.752  | 50.606 | 37.1   |
| 2     | 5996.612  | 49.370 | 31.2   |

<sup>31</sup>P-NMR (1H coupled)

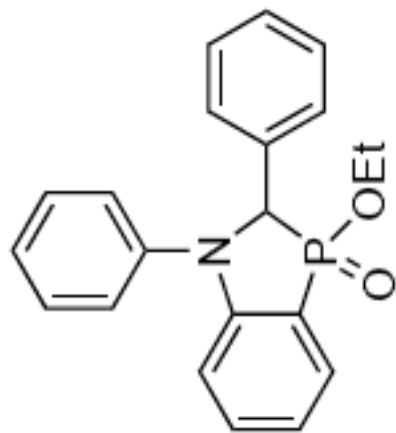

Table 2, entry 1

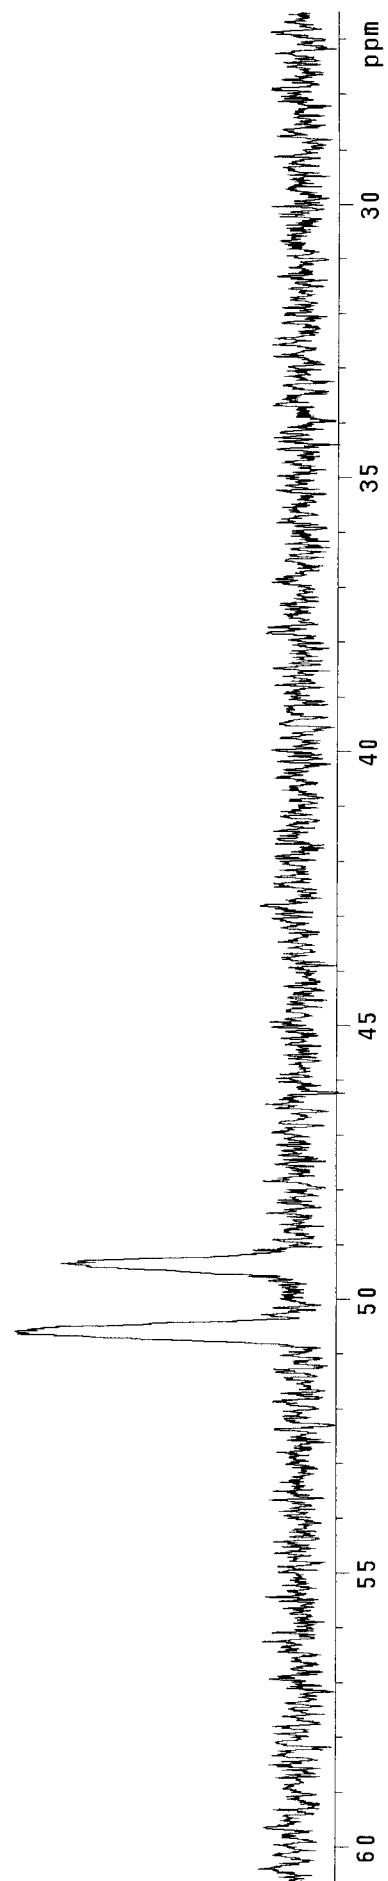

# <sup>1</sup>H-NMR

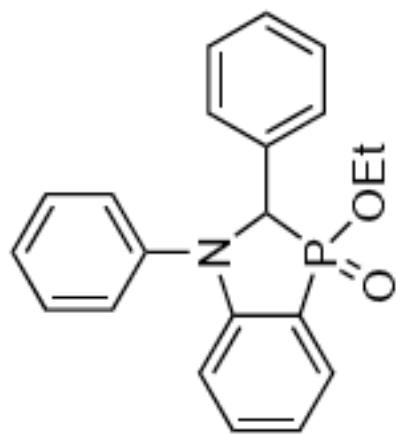

Table 2, entry 1

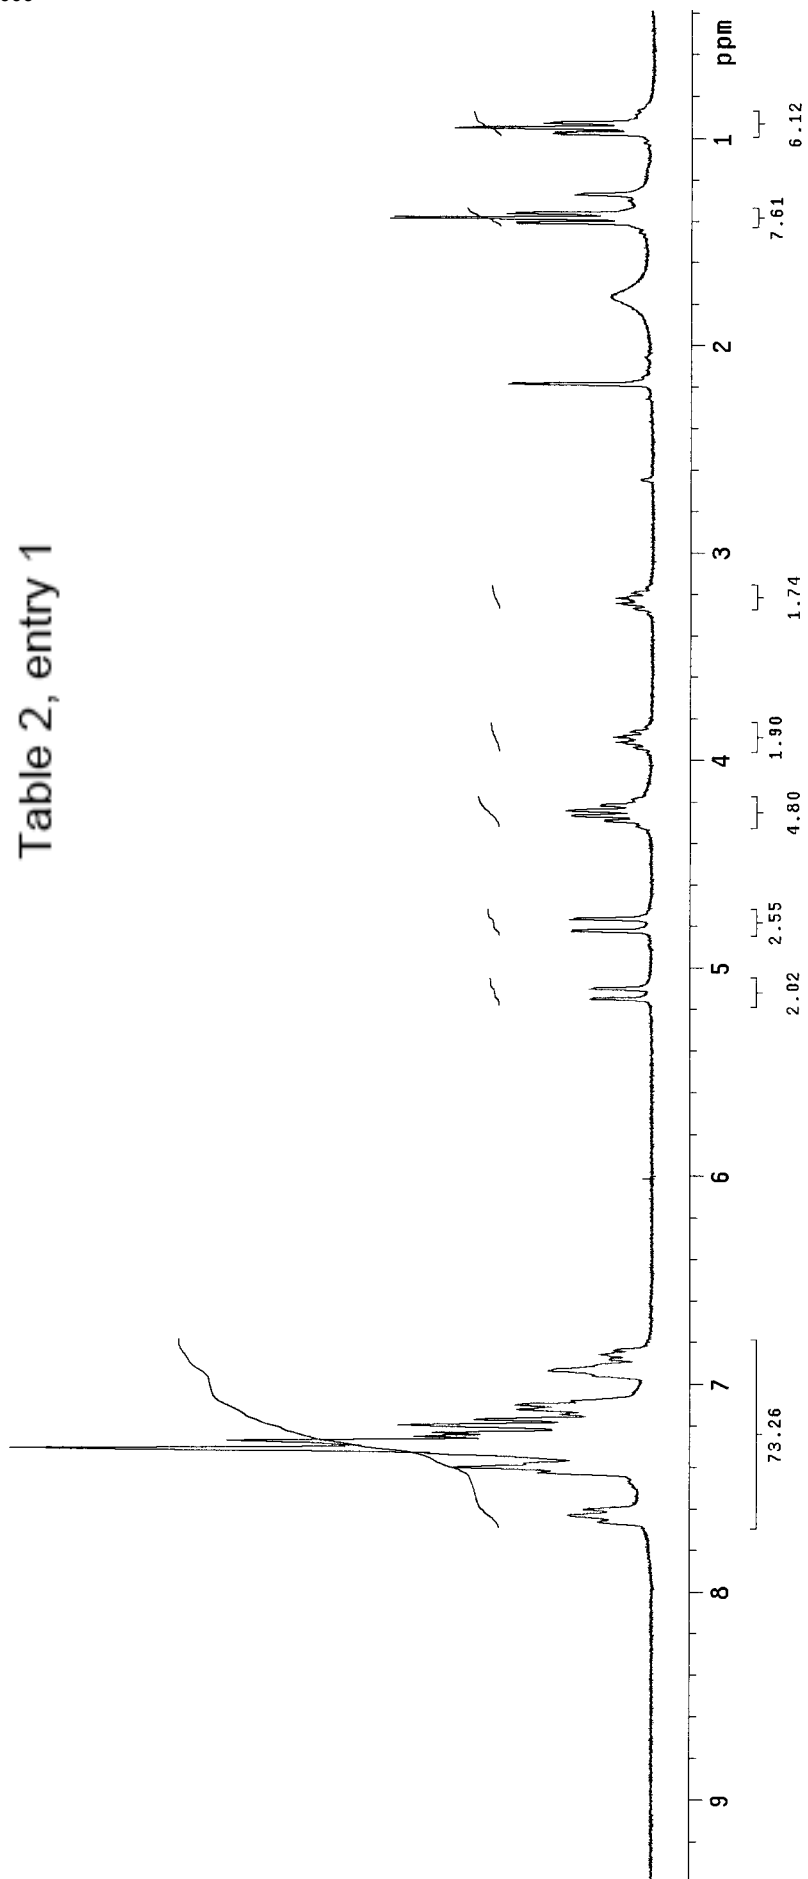

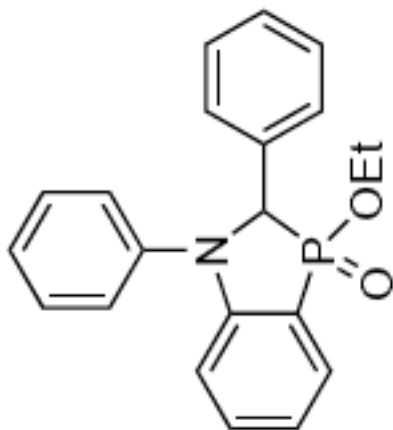

Table 2, entry 1

| INDEX | FREQUENCY | PPM     | HEIGHT | INDEX | FREQUENCY | PPM    | HEIGHT |
|-------|-----------|---------|--------|-------|-----------|--------|--------|
| 1     | 10170.341 | 134.800 | 16.5   | 40    | 4723.817  | 62.610 | 10.0   |
| 2     | 10168.614 | 134.777 | 15.7   | 41    | 4692.436  | 62.194 | 10.0   |
| 3     | 10157.386 | 134.628 | 21.8   | 42    | 4685.526  | 62.103 | 11.0   |
| 4     | 10155.658 | 134.605 | 20.4   | 43    | 1284.832  | 17.029 | 11.4   |
| 5     | 9784.342  | 129.816 | 58.1   | 44    | 1278.786  | 16.949 | 11.6   |
| 6     | 9785.993  | 129.705 | 74.5   | 45    | 1240.783  | 16.446 | 9.4    |
| 7     | 9775.916  | 129.572 | 19.8   | 46    | 1234.449  | 16.362 | 9.0    |
| 8     | 9770.158  | 129.495 | 18.9   |       |           |        |        |
| 9     | 9743.095  | 129.137 | 42.7   |       |           |        |        |
| 10    | 9741.080  | 129.110 | 39.4   |       |           |        |        |
| 11    | 9731.867  | 128.988 | 16.8   |       |           |        |        |
| 12    | 9726.685  | 128.919 | 18.8   |       |           |        |        |
| 13    | 9722.654  | 128.866 | 33.7   |       |           |        |        |
| 14    | 9720.639  | 128.839 | 30.6   |       |           |        |        |
| 15    | 9678.317  | 128.278 | 23.8   |       |           |        |        |
| 16    | 9675.438  | 128.240 | 25.1   |       |           |        |        |
| 17    | 9671.120  | 128.183 | 43.9   |       |           |        |        |
| 18    | 9667.089  | 128.129 | 29.8   |       |           |        |        |
| 19    | 9631.677  | 127.660 | 36.5   |       |           |        |        |
| 20    | 9627.071  | 127.599 | 35.8   |       |           |        |        |
| 21    | 9521.123  | 126.195 | 29.0   |       |           |        |        |
| 22    | 9514.501  | 126.107 | 54.5   |       |           |        |        |
| 23    | 9437.919  | 125.092 | 34.8   |       |           |        |        |
| 24    | 9298.863  | 123.249 | 65.2   |       |           |        |        |
| 25    | 9074.012  | 120.269 | 17.6   |       |           |        |        |
| 26    | 9061.632  | 120.105 | 26.0   |       |           |        |        |
| 27    | 9049.252  | 119.940 | 12.0   |       |           |        |        |
| 28    | 8520.953  | 112.938 | 17.7   |       |           |        |        |
| 29    | 8510.588  | 112.801 | 18.0   |       |           |        |        |
| 30    | 8460.781  | 112.141 | 14.2   |       |           |        |        |
| 31    | 8449.553  | 111.992 | 13.5   |       |           |        |        |
| 32    | 5860.741  | 77.679  | 178.1  |       |           |        |        |
| 33    | 5828.784  | 77.256  | 184.1  |       |           |        |        |
| 34    | 5796.827  | 76.832  | 180.6  |       |           |        |        |
| 35    | 4998.475  | 66.251  | 11.3   |       |           |        |        |
| 36    | 4938.304  | 65.453  | 16.2   |       |           |        |        |
| 37    | 4902.028  | 64.872  | 12.9   |       |           |        |        |
| 38    | 4838.690  | 64.133  | 15.9   |       |           |        |        |
| 39    | 4730.439  | 62.698  | 9.4    |       |           |        |        |

<sup>13</sup>C-NMR

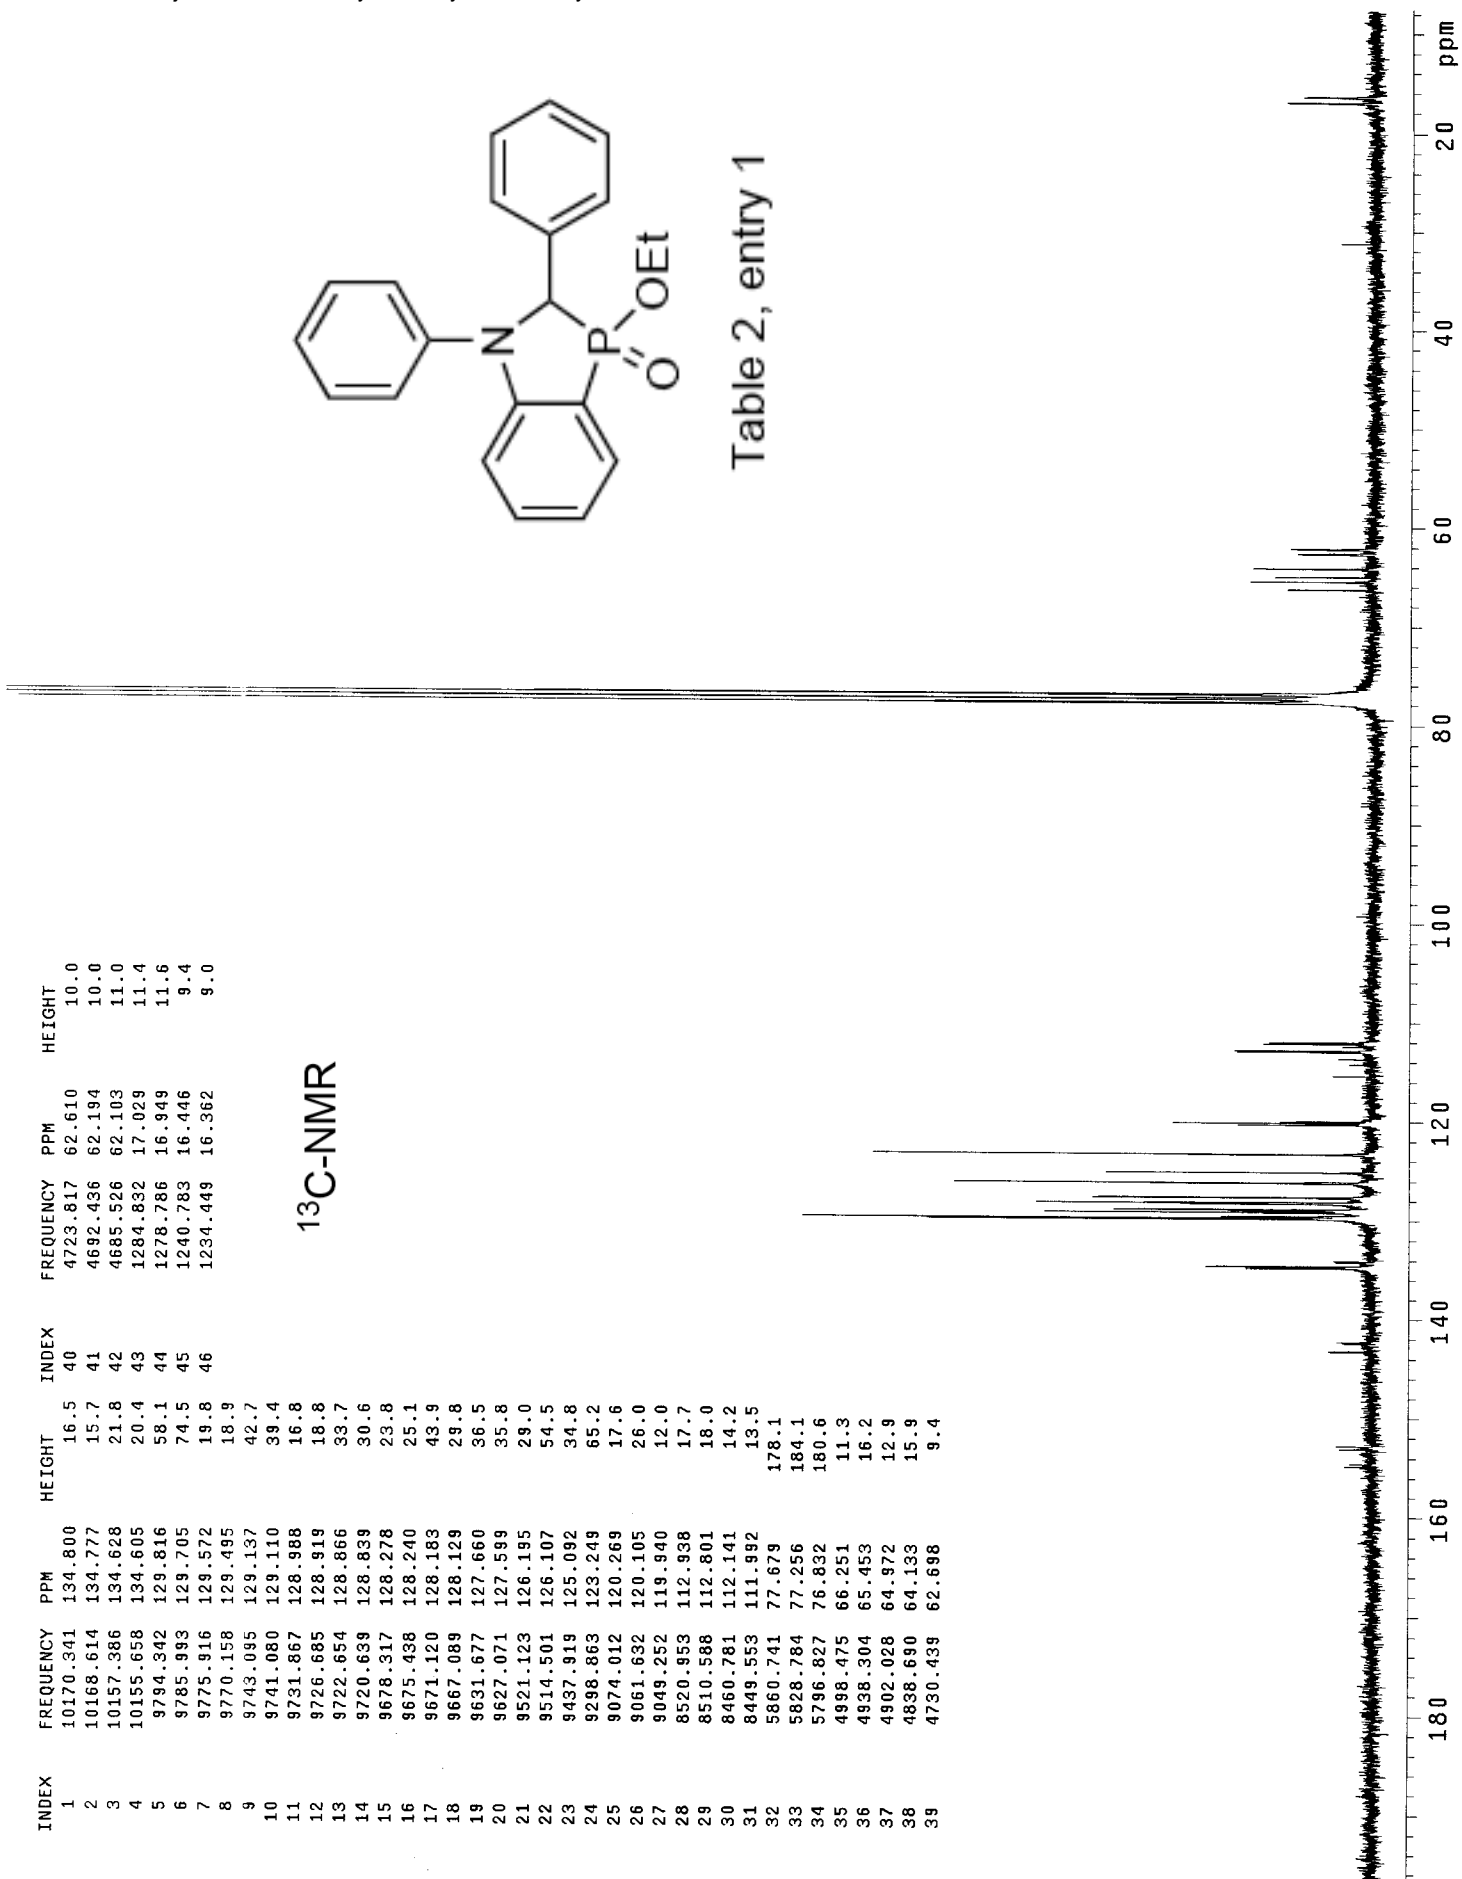

| INDEX | FREQUENCY | PPM    | HEIGHT |
|-------|-----------|--------|--------|
| 1     | 6374.818  | 52.484 | 35.4   |

$^{31}\text{P}$ -NMR ( $^1\text{H}$  decoupled)

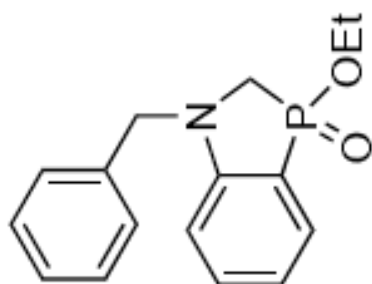

Table 2, entries 2 & 3

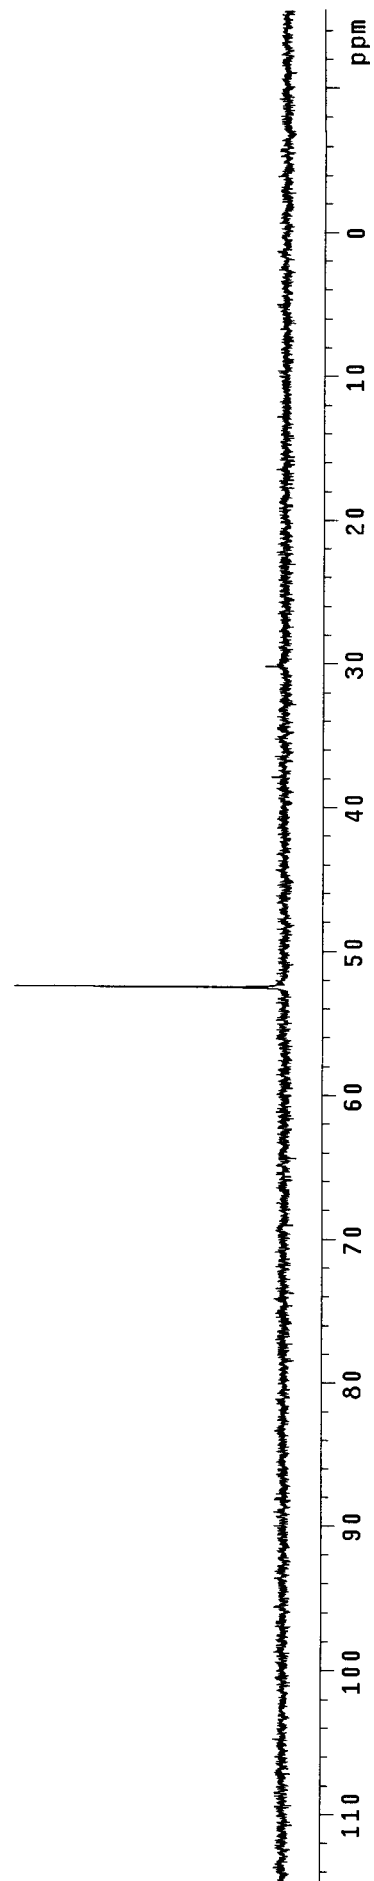

| INDEX | FREQUENCY | PPM    | HEIGHT |
|-------|-----------|--------|--------|
| 1     | 6374.410  | 52.480 | 30.6   |

<sup>31</sup>P-NMR (1H coupled)

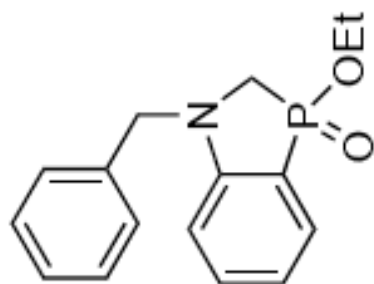

Table 2, entries 2 & 3

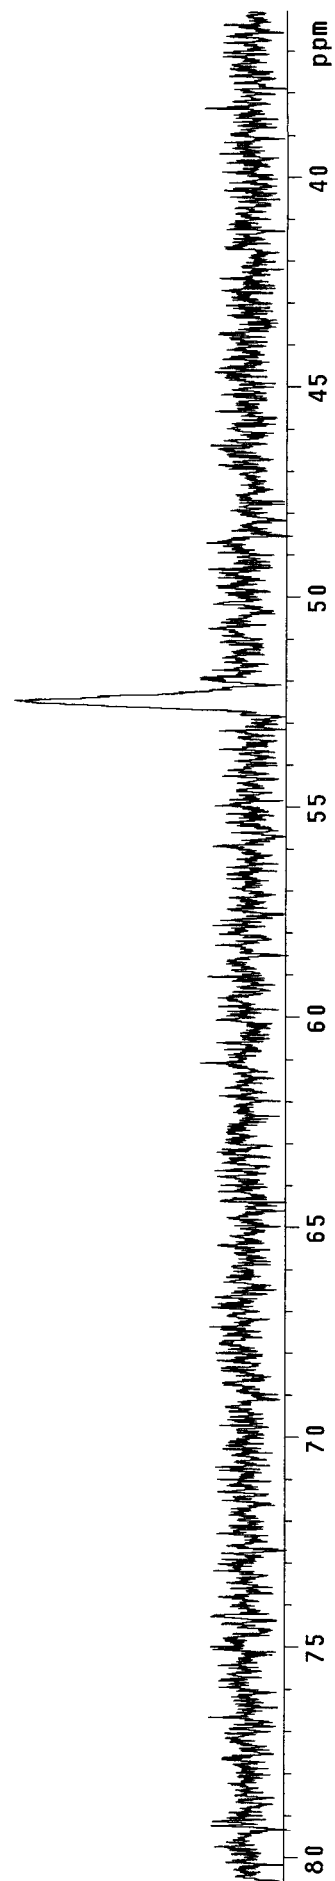

# <sup>1</sup>H-NMR

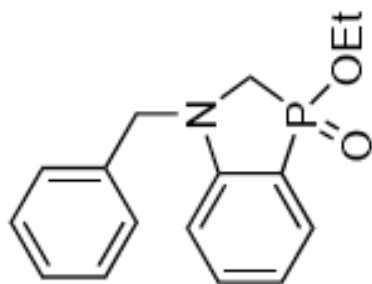

Table 2, entries 2 & 3

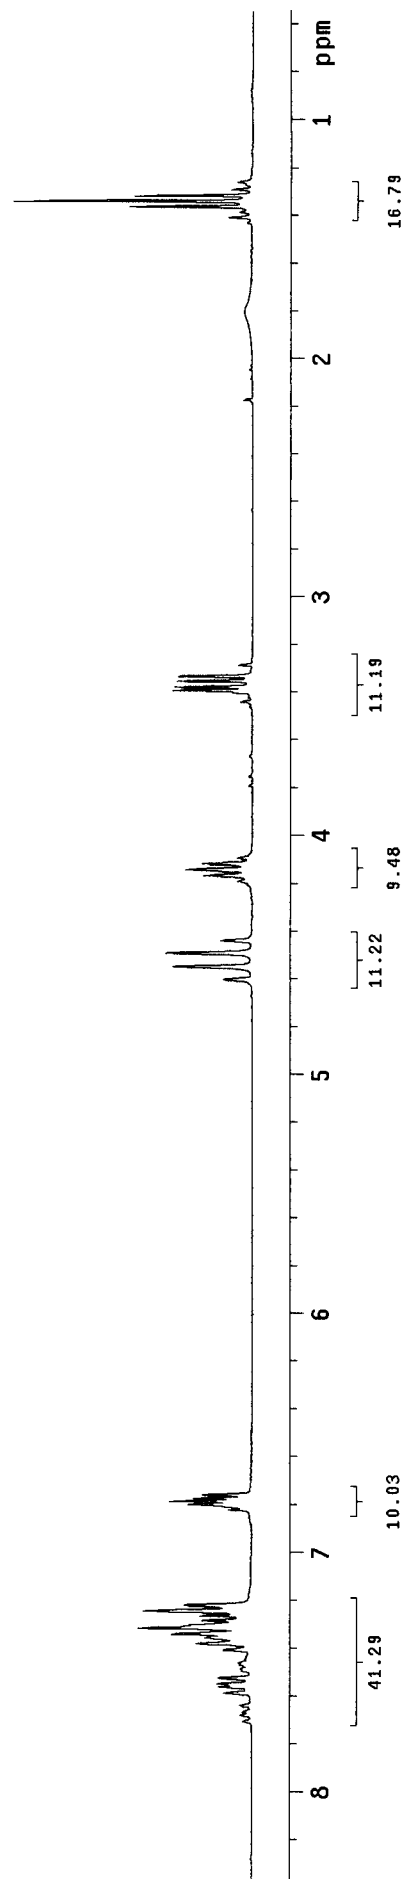

<sup>13</sup>C-NMR

| INDEX | FREQUENCY PPM | HEIGHT |
|-------|---------------|--------|
| 1     | 11727.314     | 6.3    |
| 2     | 11703.706     | 6.6    |
| 3     | 10318.899     | 15.6   |
| 4     | 10188.767     | 27.2   |
| 5     | 10186.752     | 27.7   |
| 6     | 9987.812      | 9.2    |
| 7     | 9977.735      | 10.4   |
| 8     | 9973.129      | 5.5    |
| 9     | 9739.928      | 86.4   |
| 10    | 9720.351      | 12.0   |
| 11    | 9715.169      | 26.9   |
| 12    | 9709.411      | 27.3   |
| 13    | 9648.376      | 48.8   |
| 14    | 9616.131      | 85.9   |
| 15    | 8899.543      | 24.3   |
| 16    | 8887.451      | 24.2   |
| 17    | 8610.490      | 5.3    |
| 18    | 8479.495      | 5.5    |
| 19    | 8286.677      | 24.1   |
| 20    | 8285.161      | 24.5   |
| 21    | 5869.378      | 17.3   |
| 22    | 5837.421      | 18.1   |
| 23    | 5805.176      | 18.2   |
| 24    | 4674.298      | 12.4   |
| 25    | 4667.964      | 13.9   |
| 26    | 3968.651      | 25.0   |
| 27    | 3957.999      | 25.6   |
| 28    | 3643.898      | 24.1   |
| 29    | 3541.693      | 24.5   |
| 30    | 1271.876      | 15.7   |
| 31    | 1265.542      | 15.3   |

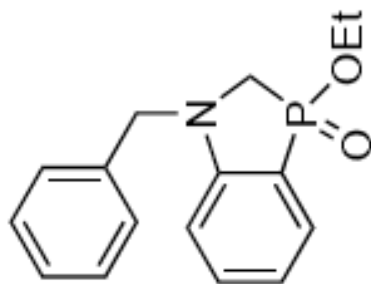

Table 2, entries 2 & 3

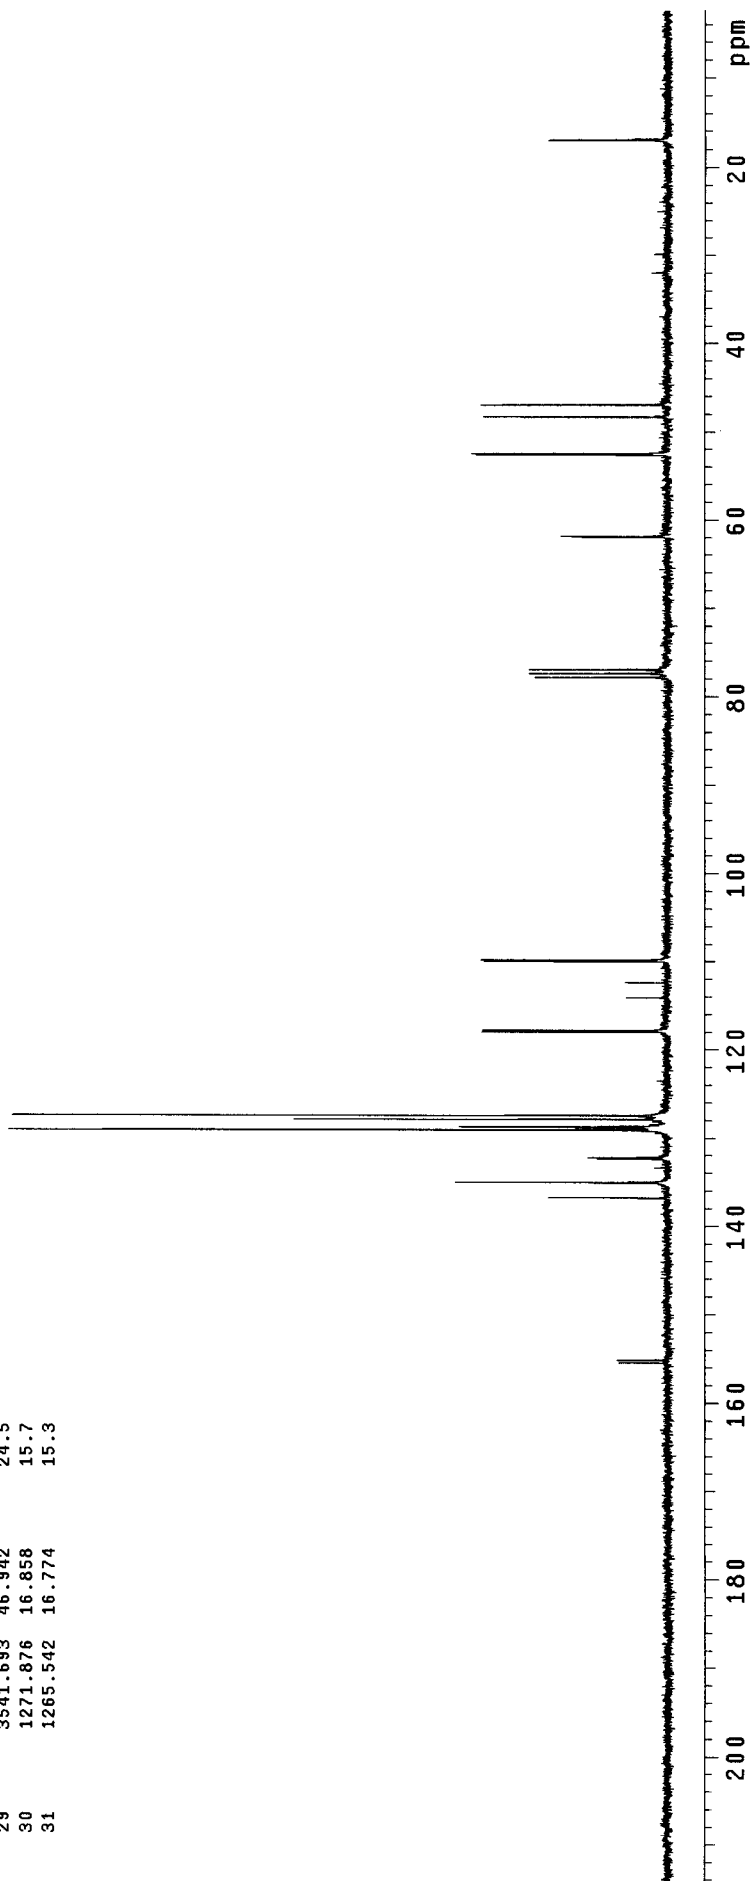

| INDEX | FREQUENCY | PPM    | HEIGHT |
|-------|-----------|--------|--------|
| 1     | 6202.646  | 51.066 | 38.0   |
| 2     | 6049.650  | 49.807 | 25.5   |

$^{31}\text{P}$ -NMR ( $^1\text{H}$  decoupled)

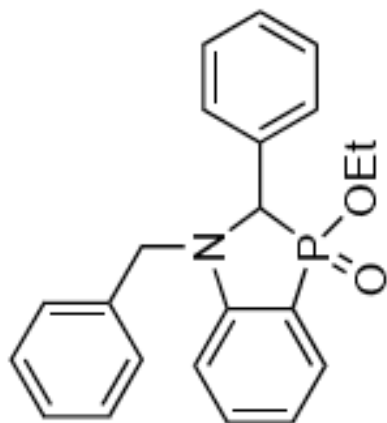

Table 2, entry 4

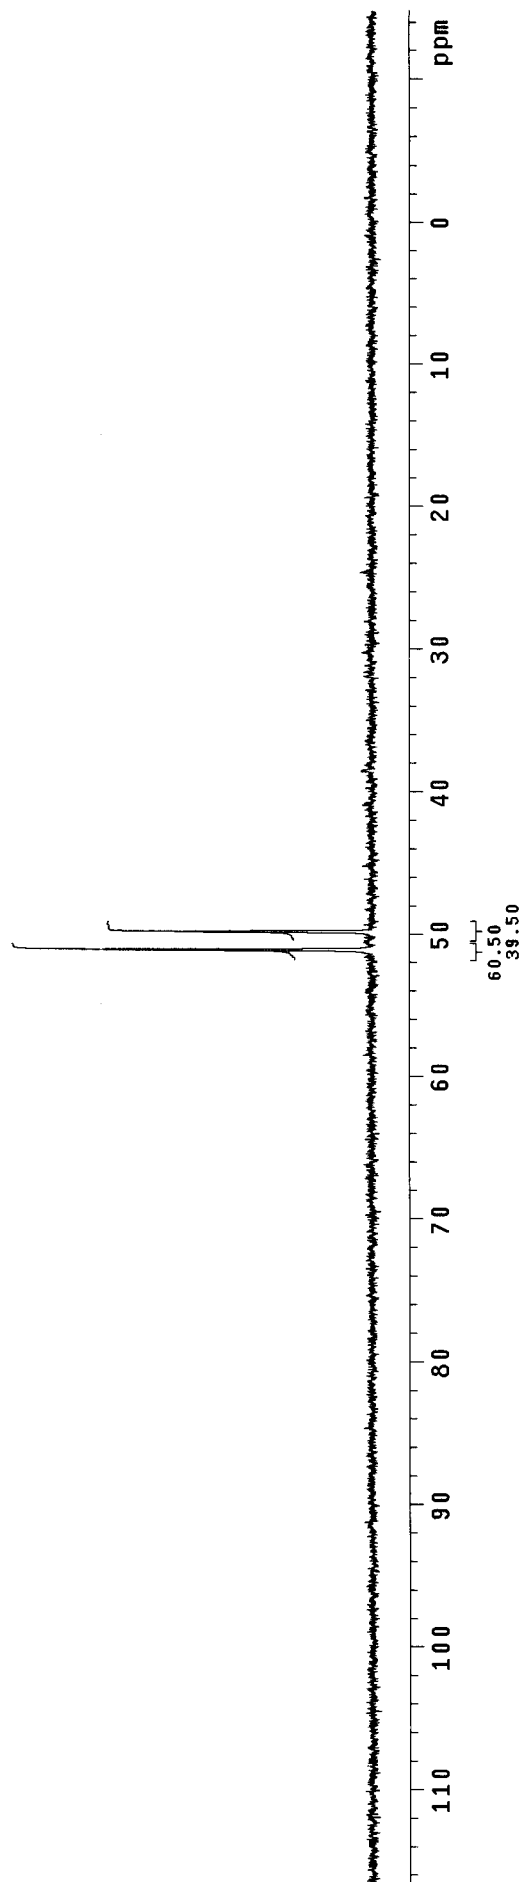



| INDEX | FREQUENCY PPM | HEIGHT |
|-------|---------------|--------|
| 1     | 6205.502      | 25.3   |
| 2     | 6051.282      | 18.1   |

<sup>31</sup>P-NMR (<sup>1</sup>H coupled)

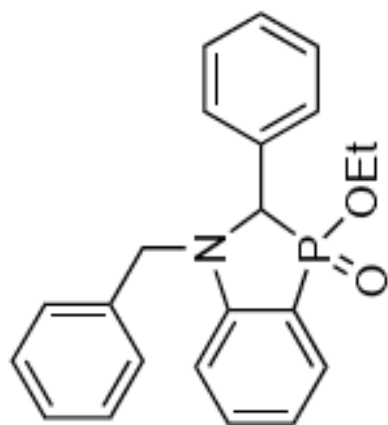

Table 2, entry 4

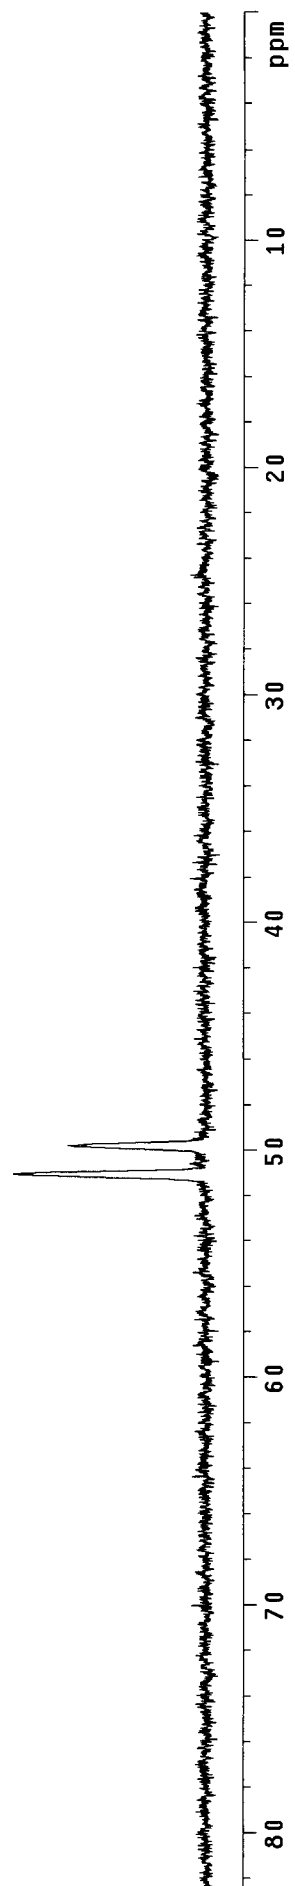

# <sup>1</sup>H-NMR

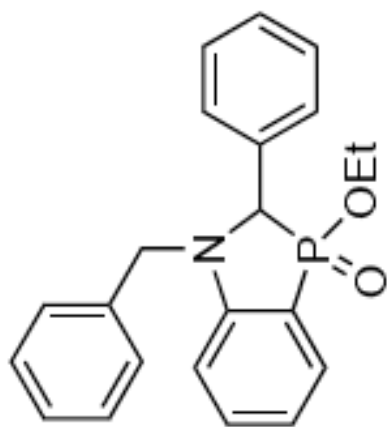

Table 2, entry 4

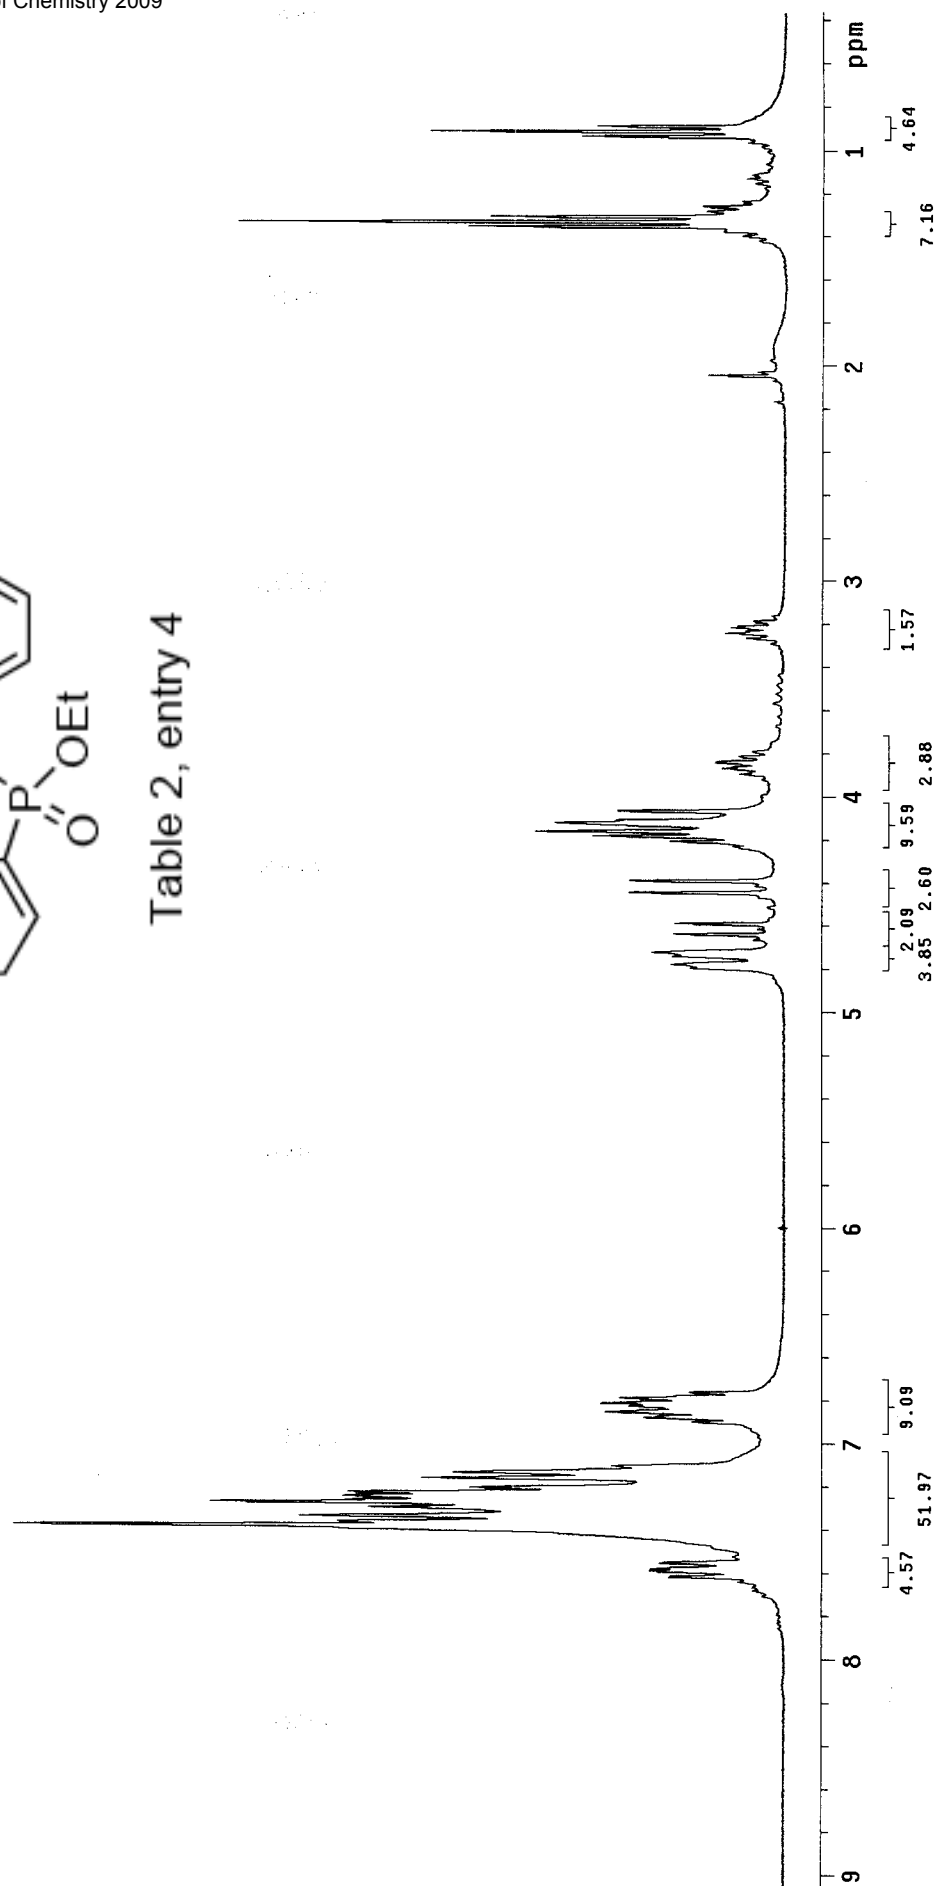

<sup>13</sup>C-NMR

| INDEX | FREQUENCY PPM | HEIGHT  | INDEX | FREQUENCY PPM | HEIGHT  |
|-------|---------------|---------|-------|---------------|---------|
| 1     | 11724.722     | 155.402 | 37    | 40            | 9.5     |
| 2     | 11701.978     | 155.100 | 41    | 8264.144      | 109.534 |
| 3     | 11681.825     | 154.833 | 42    | 8253.204      | 109.389 |
| 4     | 11659.081     | 154.532 | 43    | 5872.833      | 77.840  |
| 5     | 10337.324     | 137.013 | 44    | 5840.876      | 77.416  |
| 6     | 10288.381     | 136.364 | 45    | 5808.631      | 76.989  |
| 7     | 10201.723     | 135.215 | 46    | 4834.372      | 64.076  |
| 8     | 10199.707     | 135.189 | 47    | 4736.773      | 62.782  |
| 9     | 10100.381     | 133.872 | 48    | 4725.257      | 62.629  |
| 10    | 10096.926     | 133.826 | 49    | 4715.756      | 62.503  |
| 11    | 10090.592     | 133.743 | 50    | 4708.846      | 62.412  |
| 12    | 9989.539      | 132.403 | 51    | 4676.026      | 61.977  |
| 13    | 9979.462      | 132.270 | 52    | 4669.404      | 61.889  |
| 14    | 9772.748      | 128.530 | 53    | 4623.915      | 61.286  |
| 15    | 9767.567      | 129.461 | 54    | 3705.509      | 49.113  |
| 16    | 9753.172      | 129.270 | 55    | 3697.448      | 49.007  |
| 17    | 9751.444      | 129.247 | 56    | 3688.811      | 48.892  |
| 18    | 9745.686      | 129.171 | 57    | 1285.408      | 17.037  |
| 19    | 9743.383      | 129.141 | 58    | 1279.362      | 16.957  |
| 20    | 9733.307      | 129.007 | 59    | 1241.646      | 16.457  |
| 21    | 9722.078      | 128.858 | 60    | 1235.313      | 16.373  |
| 22    | 9709.699      | 128.694 | 61    | 22.971        | 0.300   |
| 23    | 9700.486      | 128.572 | 62    |               |         |
| 24    | 9697.895      | 128.538 | 63    |               |         |
| 25    | 9686.091      | 128.381 | 64    |               |         |
| 26    | 9681.772      | 128.324 | 65    |               |         |
| 27    | 9637.435      | 127.736 | 66    |               |         |
| 28    | 9634.268      | 127.694 | 67    |               |         |
| 29    | 9629.662      | 127.633 | 68    |               |         |
| 30    | 9602.887      | 127.278 | 69    |               |         |
| 31    | 8964.897      | 118.822 | 70    |               |         |
| 32    | 8952.805      | 118.662 | 71    |               |         |
| 33    | 8923.151      | 118.269 | 72    |               |         |
| 34    | 8911.059      | 118.109 | 73    |               |         |
| 35    | 8562.410      | 113.488 | 74    |               |         |
| 36    | 8536.211      | 113.140 | 75    |               |         |
| 37    | 8429.112      | 111.721 | 76    |               |         |
| 38    | 8406.368      | 111.420 | 77    |               |         |
| 39    | 8361.743      | 110.828 | 78    |               |         |

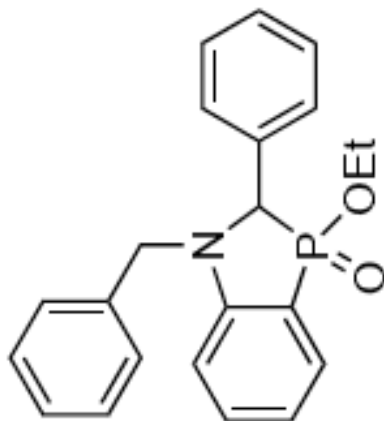

Table 2, entry 4

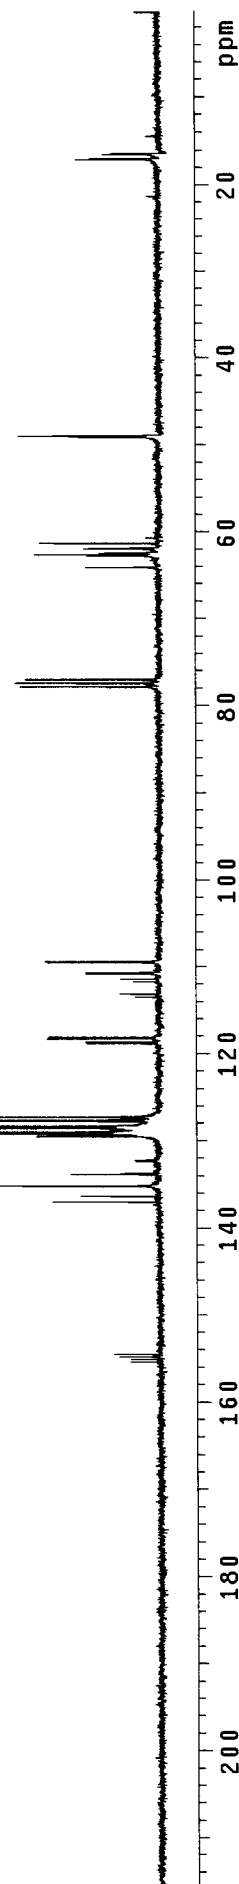



| INDEX | FREQUENCY | PPM    | HEIGHT |
|-------|-----------|--------|--------|
| 1     | 6359.314  | 52.356 | 30.6   |
| 2     | 6229.574  | 51.288 | 19.3   |

<sup>31</sup>P-NMR (<sup>1</sup>H coupled)

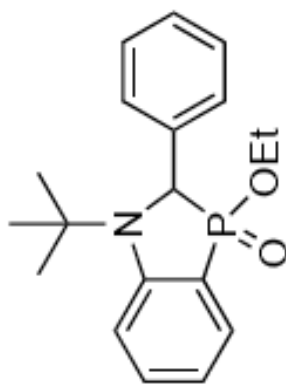

Table 2, entry 5

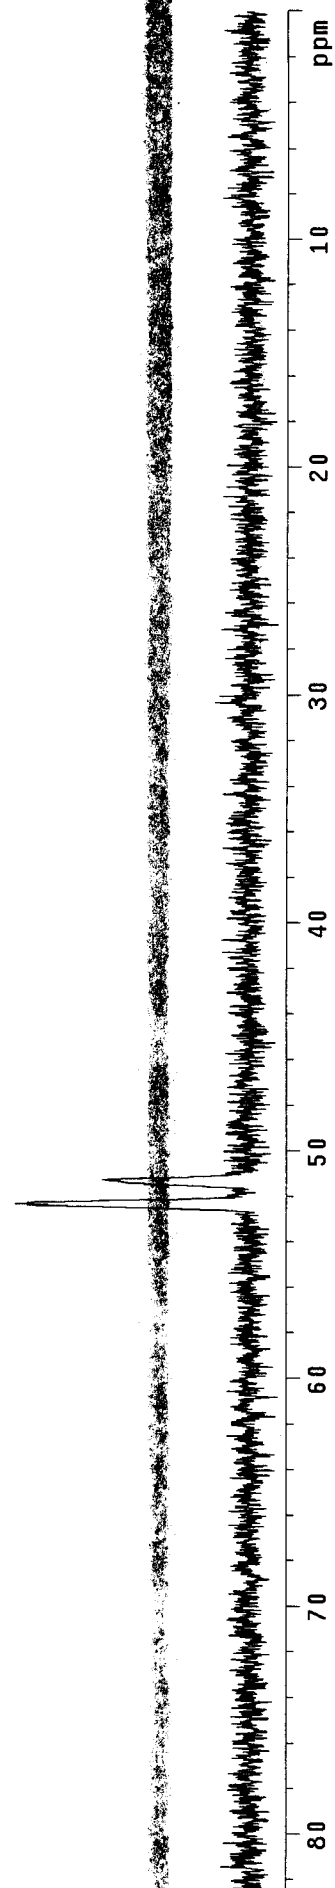

# <sup>1</sup>H-NMR

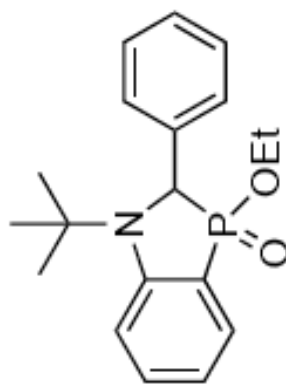

Table 2, entry 5

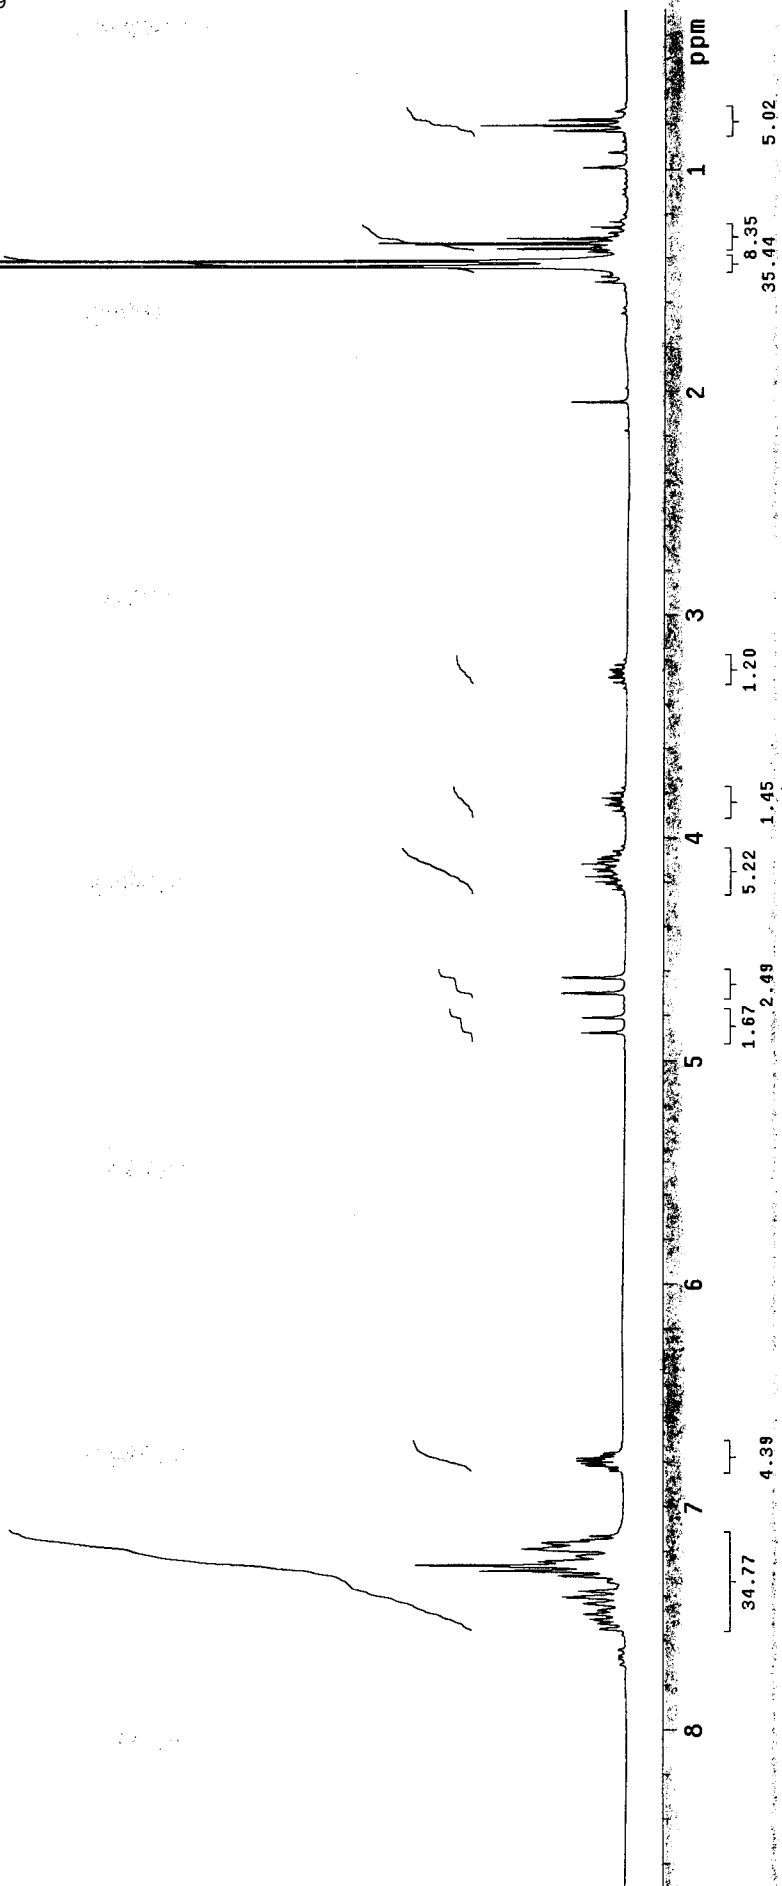

<sup>13</sup>C-NMR

| INDEX | FREQUENCY PPM | HEIGHT  | INDEX | FREQUENCY PPM | HEIGHT |
|-------|---------------|---------|-------|---------------|--------|
| 1     | 11687.583     | 154.909 | 6.7   | 40            | 43.1   |
| 2     | 11662.248     | 154.574 | 6.5   | 41            | 45.8   |
| 3     | 11637.200     | 154.242 | 9.9   | 42            | 44.8   |
| 4     | 11613.880     | 153.932 | 9.7   | 43            | 16.3   |
| 5     | 10501.716     | 139.192 | 9.1   | 44            | 18.0   |
| 6     | 10487.398     | 139.134 | 10.1  | 45            | 23.5   |
| 7     | 10343.370     | 137.093 | 23.9  | 46            | 21.7   |
| 8     | 10124.277     | 134.189 | 30.4  | 47            | 22.4   |
| 9     | 10121.686     | 134.155 | 51.6  | 48            | 22.0   |
| 10    | 10119.671     | 134.128 | 43.0  | 49            | 36.8   |
| 11    | 9987.236      | 132.373 | 11.3  | 50            | 35.9   |
| 12    | 9977.159      | 132.239 | 12.2  | 51            | 13.1   |
| 13    | 9815.934      | 130.102 | 35.3  | 52            | 13.1   |
| 14    | 9809.888      | 130.022 | 35.0  | 53            | 20.2   |
| 15    | 9760.657      | 129.370 | 24.4  | 54            | 20.1   |
| 16    | 9755.763      | 129.305 | 25.0  | 55            | 5.6    |
| 17    | 9736.473      | 129.049 | 82.3  | 56            | 146.3  |
| 18    | 9734.170      | 129.018 | 102.5 | 57            | 207.1  |
| 19    | 9731.003      | 128.976 | 59.8  | 58            | 23.6   |
| 20    | 9719.199      | 128.820 | 16.3  | 59            | 21.2   |
| 21    | 3707.107      | 128.660 | 16.2  | 60            | 15.5   |
| 22    | 9644.057      | 127.824 | 38.0  | 61            | 14.9   |
| 23    | 8641.178      | 127.786 | 38.3  |               |        |
| 24    | 9631.101      | 127.652 | 26.0  |               |        |
| 25    | 9628.510      | 127.618 | 26.5  |               |        |
| 26    | 9579.855      | 126.973 | 77.7  |               |        |
| 27    | 9575.824      | 126.920 | 76.0  |               |        |
| 28    | 9569.778      | 126.840 | 51.2  |               |        |
| 29    | 9565.748      | 126.786 | 48.6  |               |        |
| 30    | 8915.954      | 118.174 | 22.7  |               |        |
| 31    | 8903.862      | 118.013 | 22.4  |               |        |
| 32    | 8884.284      | 117.754 | 35.5  |               |        |
| 33    | 8872.193      | 117.594 | 34.0  |               |        |
| 34    | 8717.301      | 115.541 | 6.4   |               |        |
| 35    | 8666.055      | 114.861 | 21.8  |               |        |
| 36    | 8654.539      | 114.709 | 21.2  |               |        |
| 37    | 8611.642      | 114.140 | 33.7  |               |        |
| 38    | 8601.277      | 114.003 | 33.9  |               |        |
| 39    | 8589.185      | 113.843 | 8.1   |               |        |

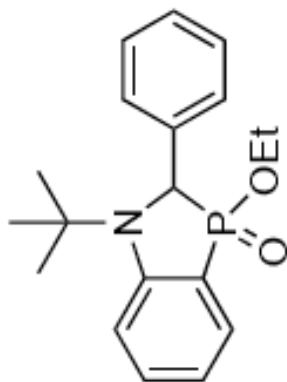

Table 2, entry 5

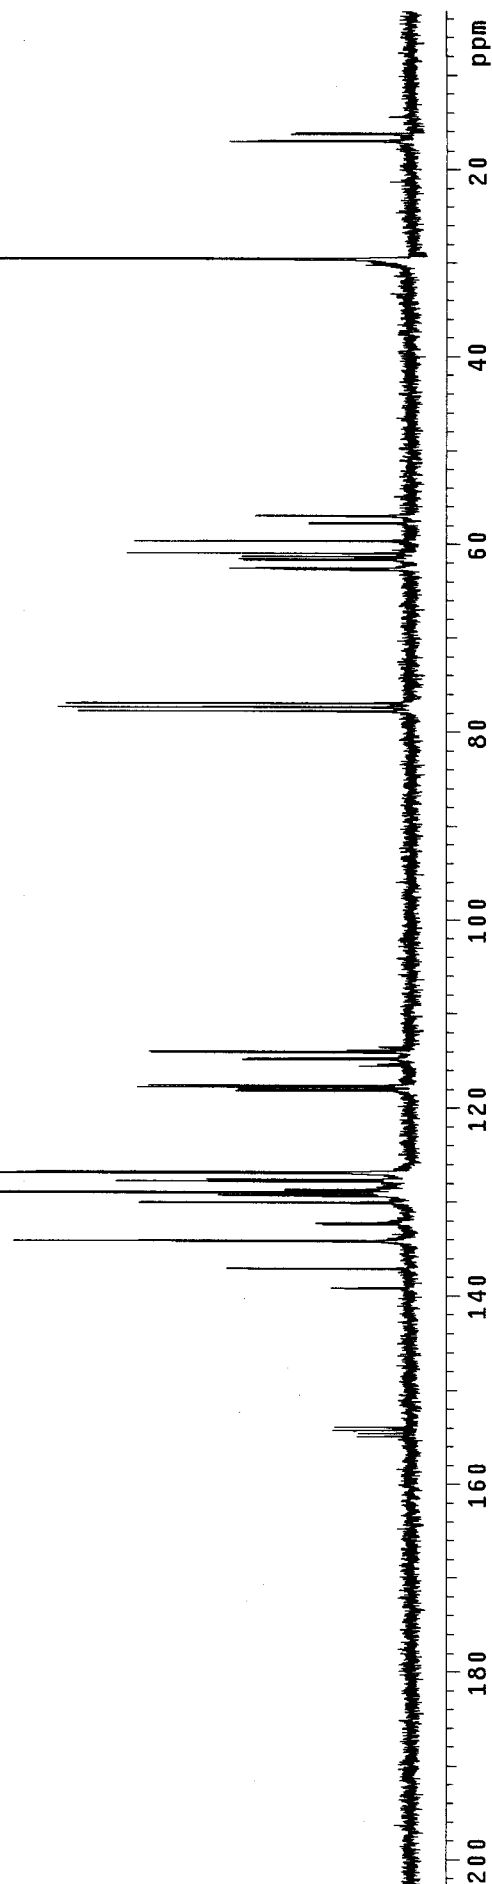

| INDEX | FREQUENCY | PPM    | HEIGHT |
|-------|-----------|--------|--------|
| 1     | 6131.656  | 50.482 | 126.0  |
| 2     | 5967.237  | 49.128 | 110.8  |

$^{31}\text{P}$ -NMR ( $^1\text{H}$  decoupled)

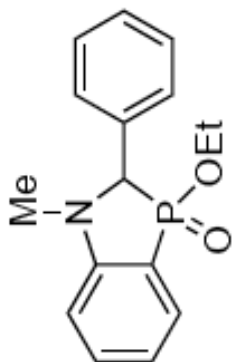

Table 2, entry 6

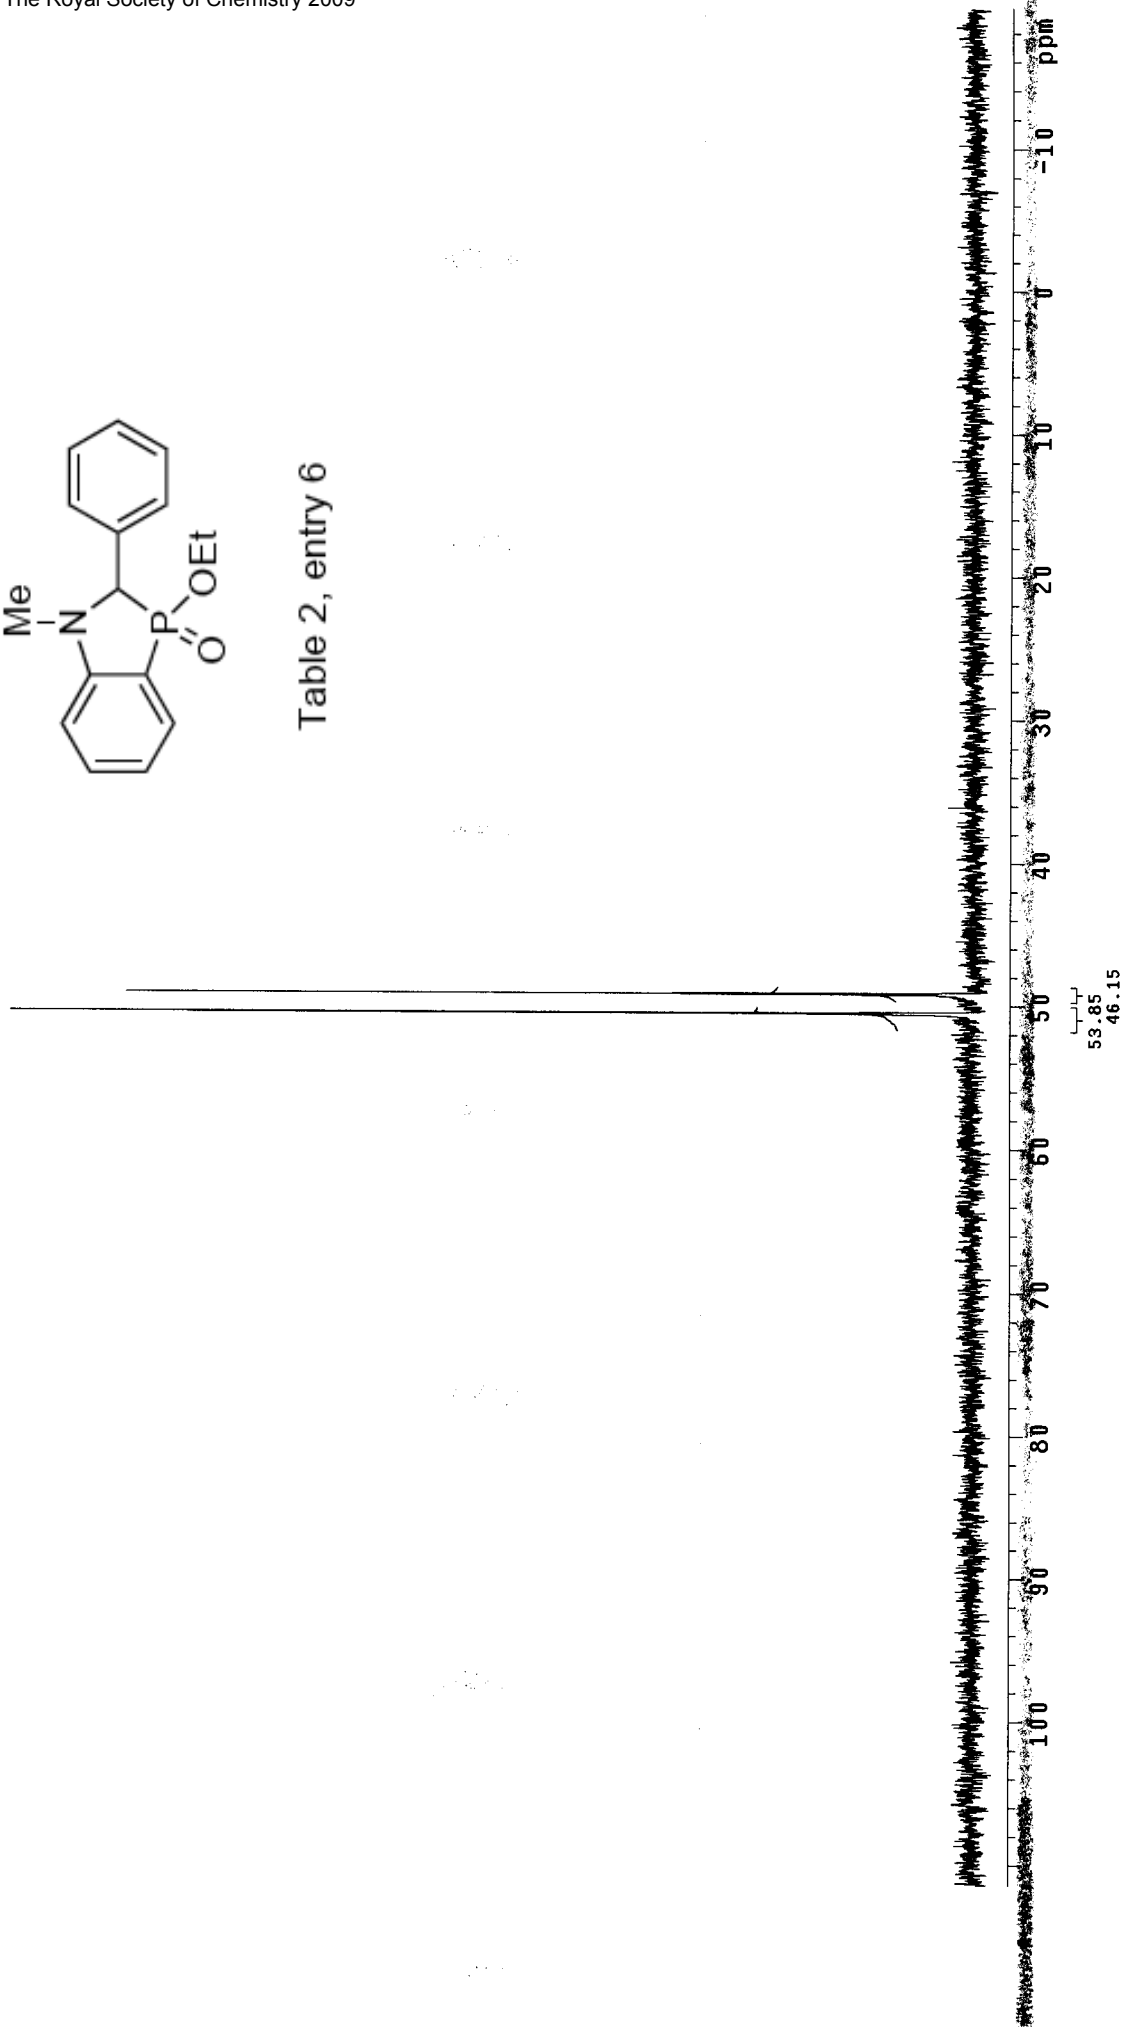



| INDEX | FREQUENCY | PPM    | HEIGHT |
|-------|-----------|--------|--------|
| 1     | 6132.880  | 50.492 | 29.9   |
| 2     | 5969.685  | 49.148 | 30.7   |

<sup>31</sup>P-NMR (<sup>1</sup>H coupled)

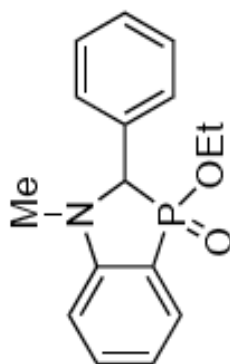

Table 2, entry 6

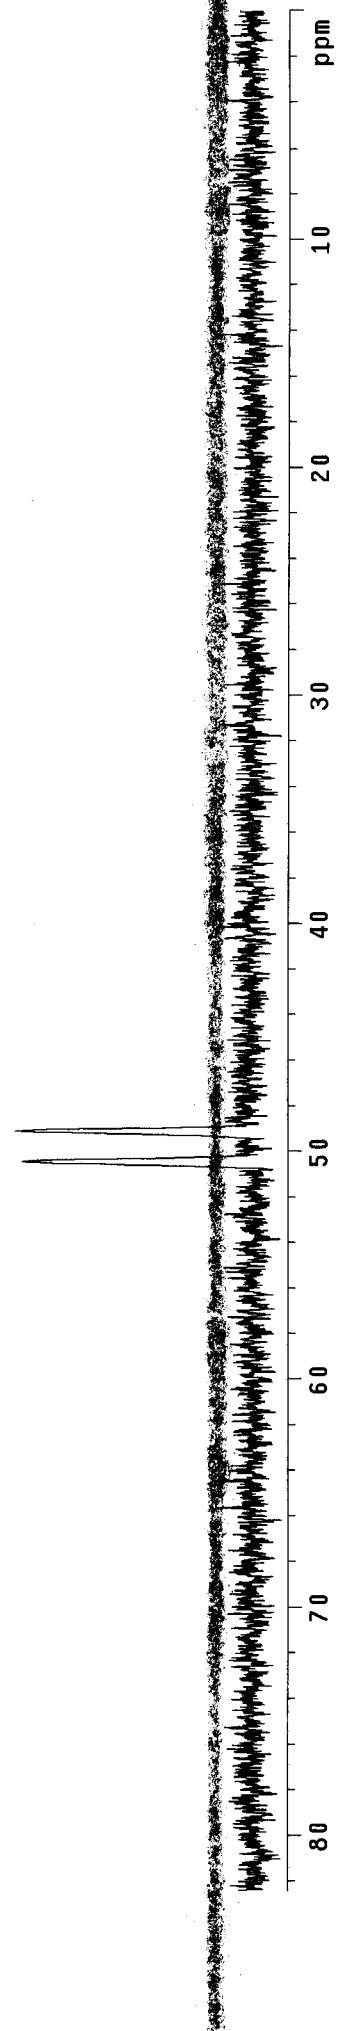

# <sup>1</sup>H-NMR

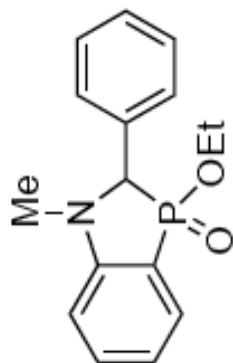

Table 2, entry 6

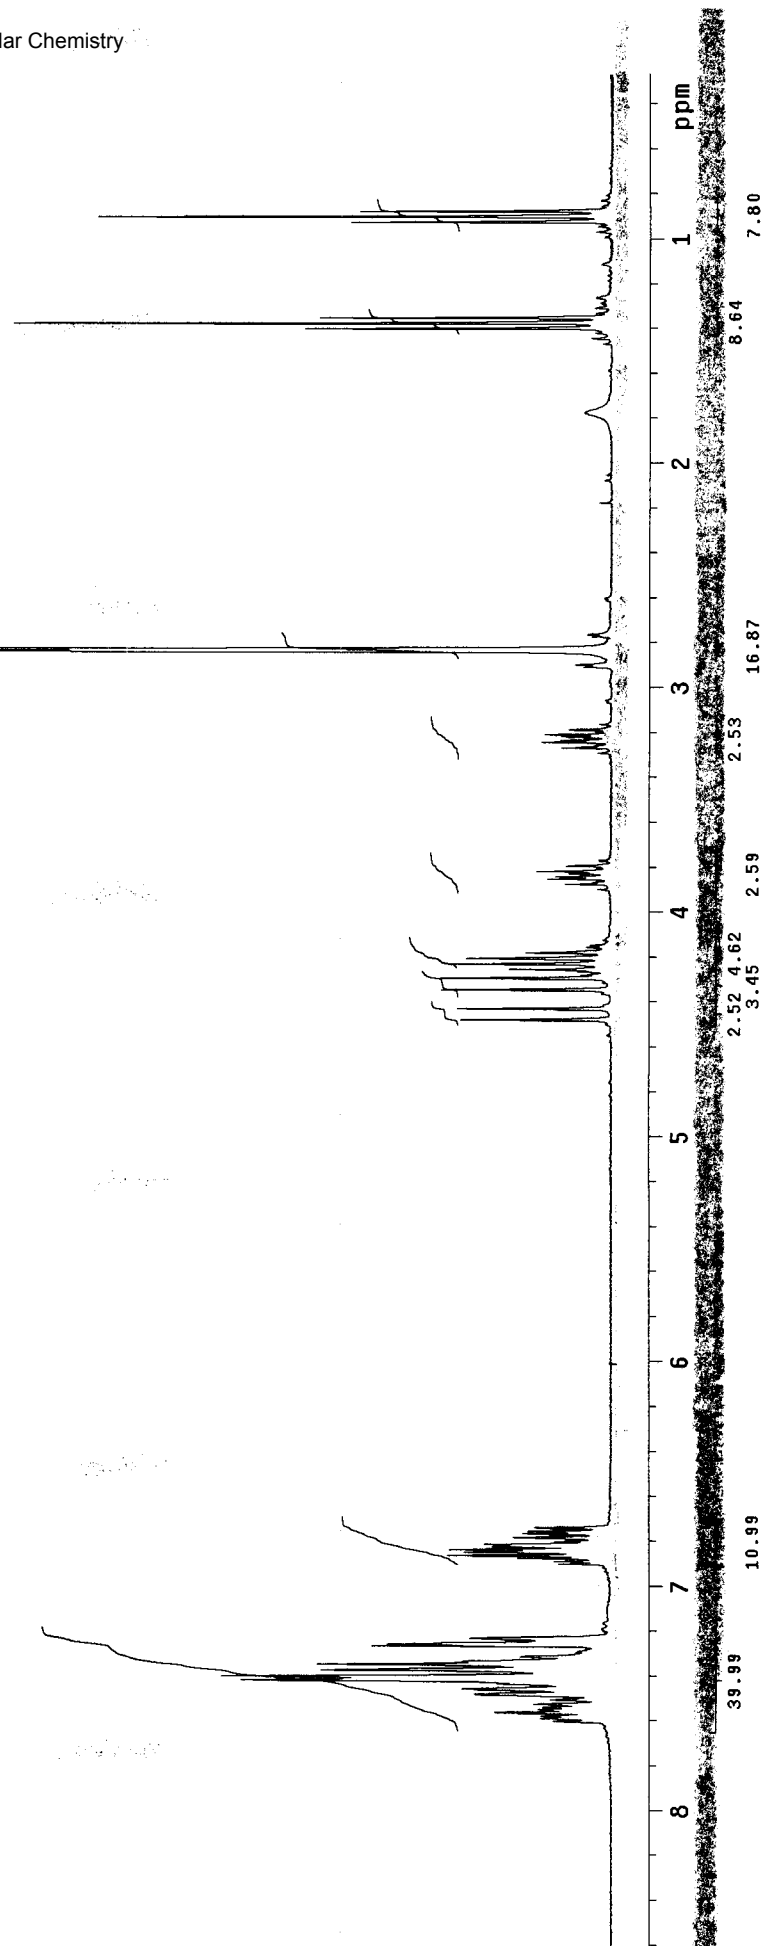

<sup>13</sup>C-NMR

| INDEX | FREQUENCY PPM | HEIGHT  | INDEX | FREQUENCY PPM | HEIGHT |
|-------|---------------|---------|-------|---------------|--------|
| 1     | 11795.258     | 156.336 | 6.5   | 40            | 35.3   |
| 2     | 11772.226     | 156.031 | 6.8   | 41            | 26.4   |
| 3     | 11733.935     | 155.524 | 7.1   | 42            | 25.8   |
| 4     | 11710.903     | 155.218 | 7.3   | 43            | 28.2   |
| 5     | 10190.844     | 135.177 | 30.9  | 44            | 28.4   |
| 6     | 10196.828     | 135.151 | 34.4  | 45            | 16.6   |
| 7     | 10194.813     | 135.124 | 36.3  | 46            | 17.7   |
| 8     | 10192.798     | 135.097 | 33.8  | 47            | 16.1   |
| 9     | 10113.913     | 134.052 | 10.1  | 48            | 17.7   |
| 10    | 10107.003     | 133.960 | 10.8  | 49            | 21.0   |
| 11    | 10103.836     | 133.918 | 11.1  | 50            | 21.0   |
| 12    | 10099.517     | 133.861 | 11.0  | 51            | 21.6   |
| 13    | 9747.702      | 129.198 | 70.7  | 52            | 22.7   |
| 14    | 9745.686      | 129.171 | 93.4  | 53            | 17.6   |
| 15    | 9740.792      | 129.106 | 79.0  | 54            | 18.2   |
| 16    | 9738.489      | 129.076 | 68.2  | 55            | 16.7   |
| 17    | 9727.836      | 128.935 | 30.4  | 56            | 17.3   |
| 18    | 9722.654      | 128.866 | 30.1  |               |        |
| 19    | 9693.000      | 128.473 | 34.5  |               |        |
| 20    | 9690.121      | 128.435 | 50.7  |               |        |
| 21    | 9686.954      | 128.393 | 33.2  |               |        |
| 22    | 9668.241      | 128.145 | 61.3  |               |        |
| 23    | 9663.634      | 128.084 | 61.5  |               |        |
| 24    | 9647.224      | 127.866 | 36.3  |               |        |
| 25    | 9643.193      | 127.813 | 36.6  |               |        |
| 26    | 8968.928      | 118.876 | 25.0  |               |        |
| 27    | 8956.836      | 118.716 | 24.8  |               |        |
| 28    | 8907.317      | 118.059 | 28.0  |               |        |
| 29    | 8895.225      | 117.899 | 27.5  |               |        |
| 30    | 8572.199      | 113.617 | 5.4   |               |        |
| 31    | 8552.046      | 113.350 | 6.1   |               |        |
| 32    | 8439.188      | 111.855 | 5.4   |               |        |
| 33    | 8422.490      | 111.633 | 6.1   |               |        |
| 34    | 8326.907      | 110.366 | 24.7  |               |        |
| 35    | 8315.679      | 110.218 | 25.4  |               |        |
| 36    | 8239.385      | 109.206 | 28.5  |               |        |
| 37    | 8228.444      | 109.061 | 28.6  |               |        |
| 38    | 5868.802      | 77.786  | 34.0  |               |        |
| 39    | 5836.845      | 77.363  | 35.7  |               |        |

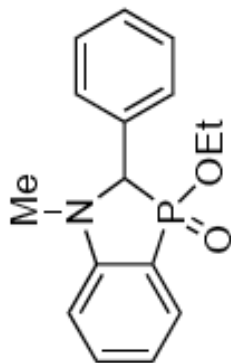

Table 2, entry 6

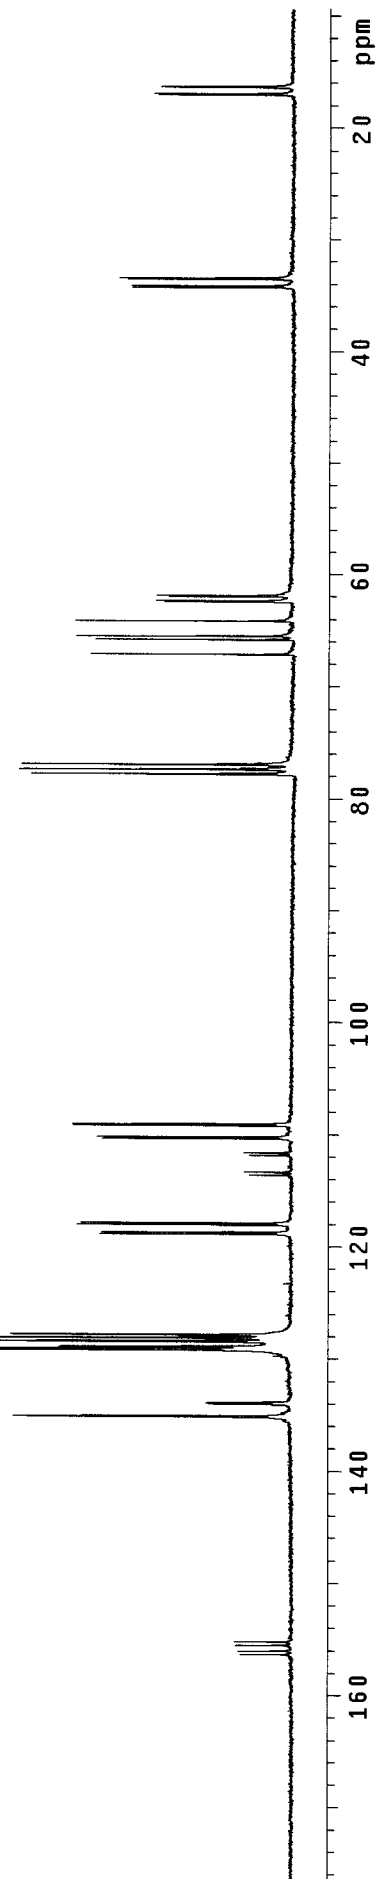

| INDEX | FREQUENCY | PPM    | HEIGHT |
|-------|-----------|--------|--------|
| 1     | 6610.227  | 54.422 | 62.4   |
| 2     | 5225.921  | 43.025 | 126.0  |

<sup>31</sup>P-NMR (<sup>1</sup>H decoupled)

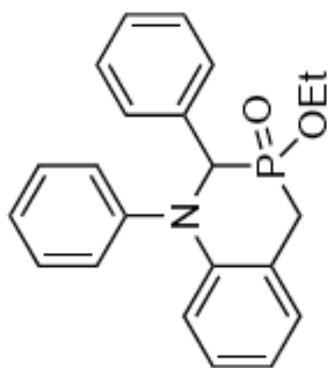

Table 2, entry 7

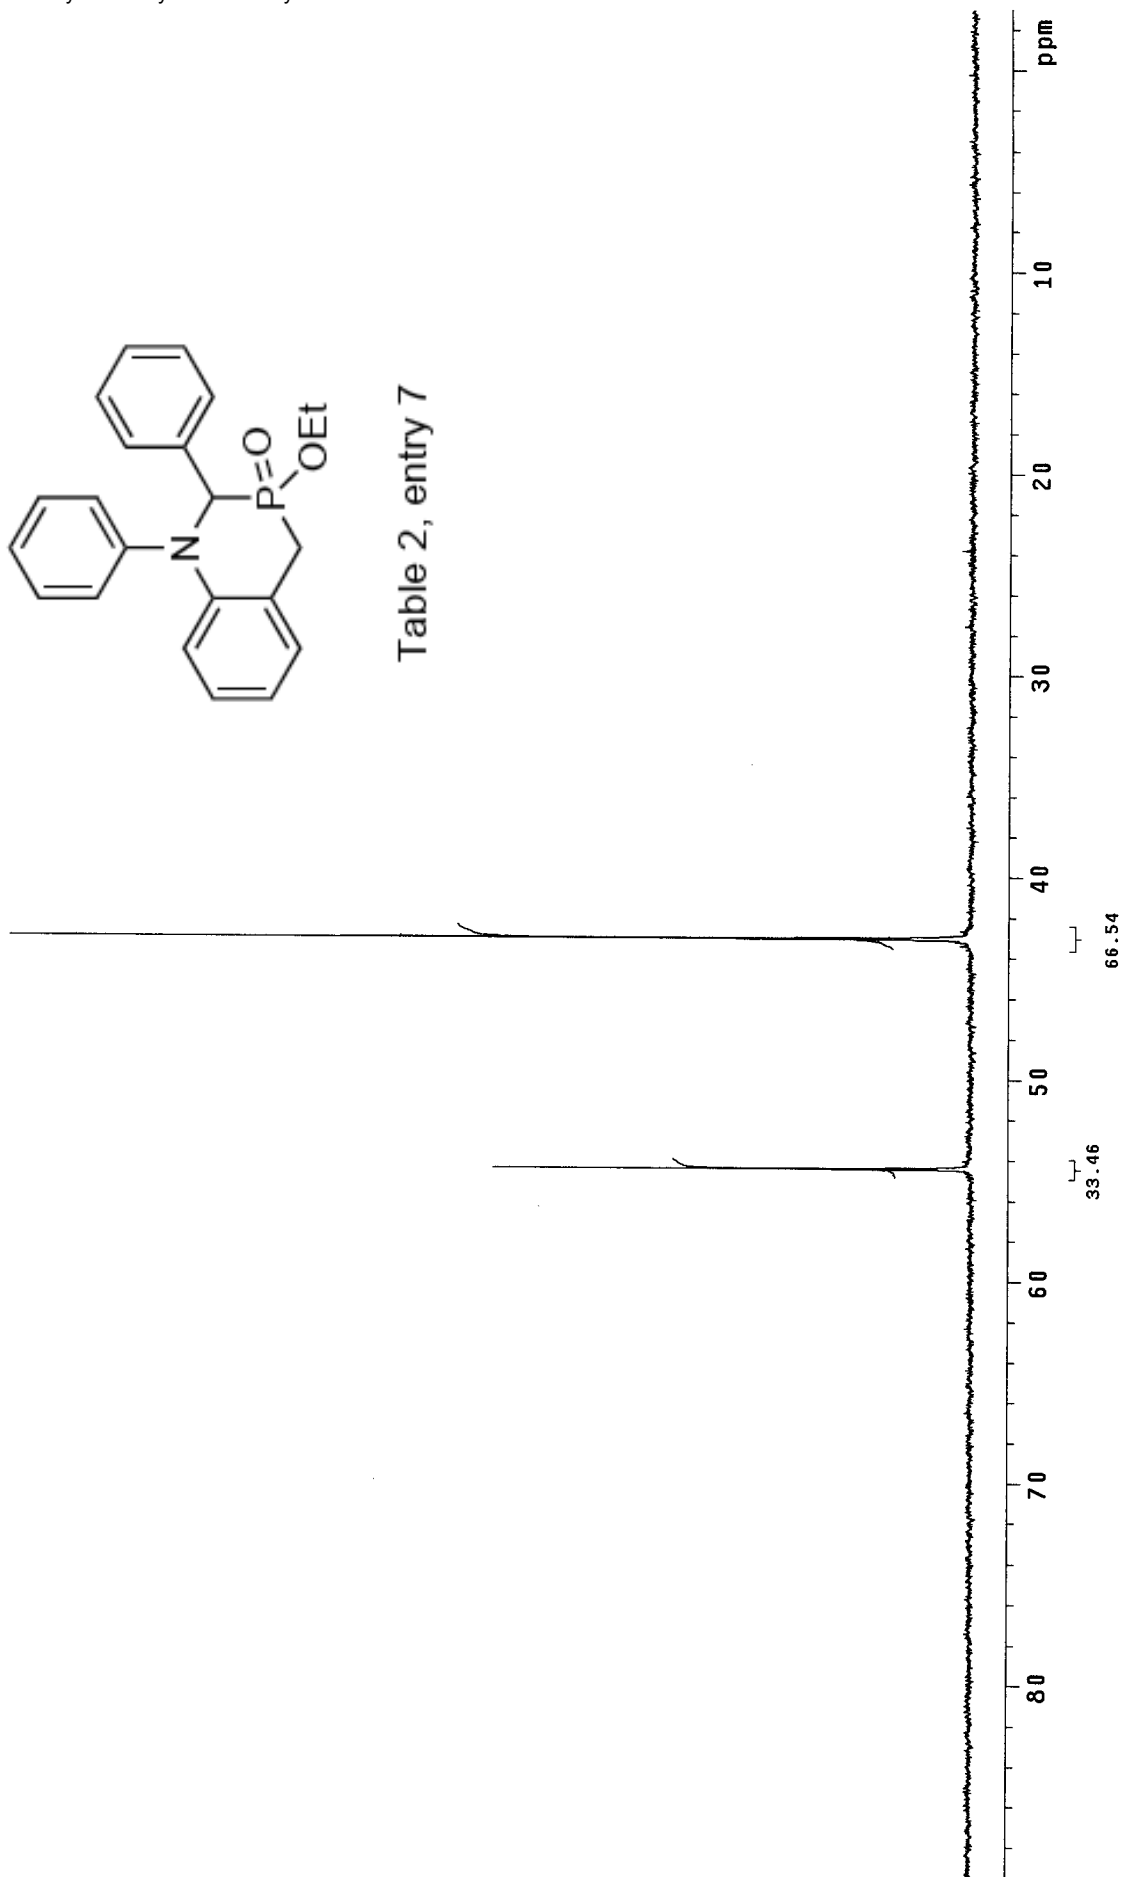

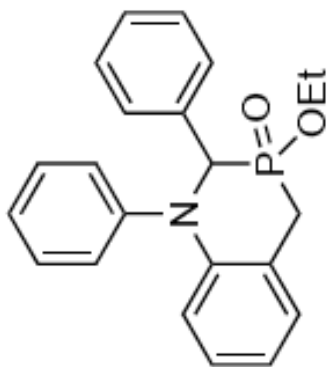

Table 2, entry 7

| INDEX | FREQUENCY | PPM    | HEIGHT |
|-------|-----------|--------|--------|
| 1     | 6605.739  | 54.385 | 39.2   |
| 2     | 5239.384  | 43.136 | 71.0   |
| 3     | 5231.224  | 43.069 | 71.6   |
| 4     | 5222.248  | 42.995 | 69.0   |
| 5     | 5213.681  | 42.924 | 71.5   |

<sup>31</sup>P-NMR (<sup>1</sup>H coupled)

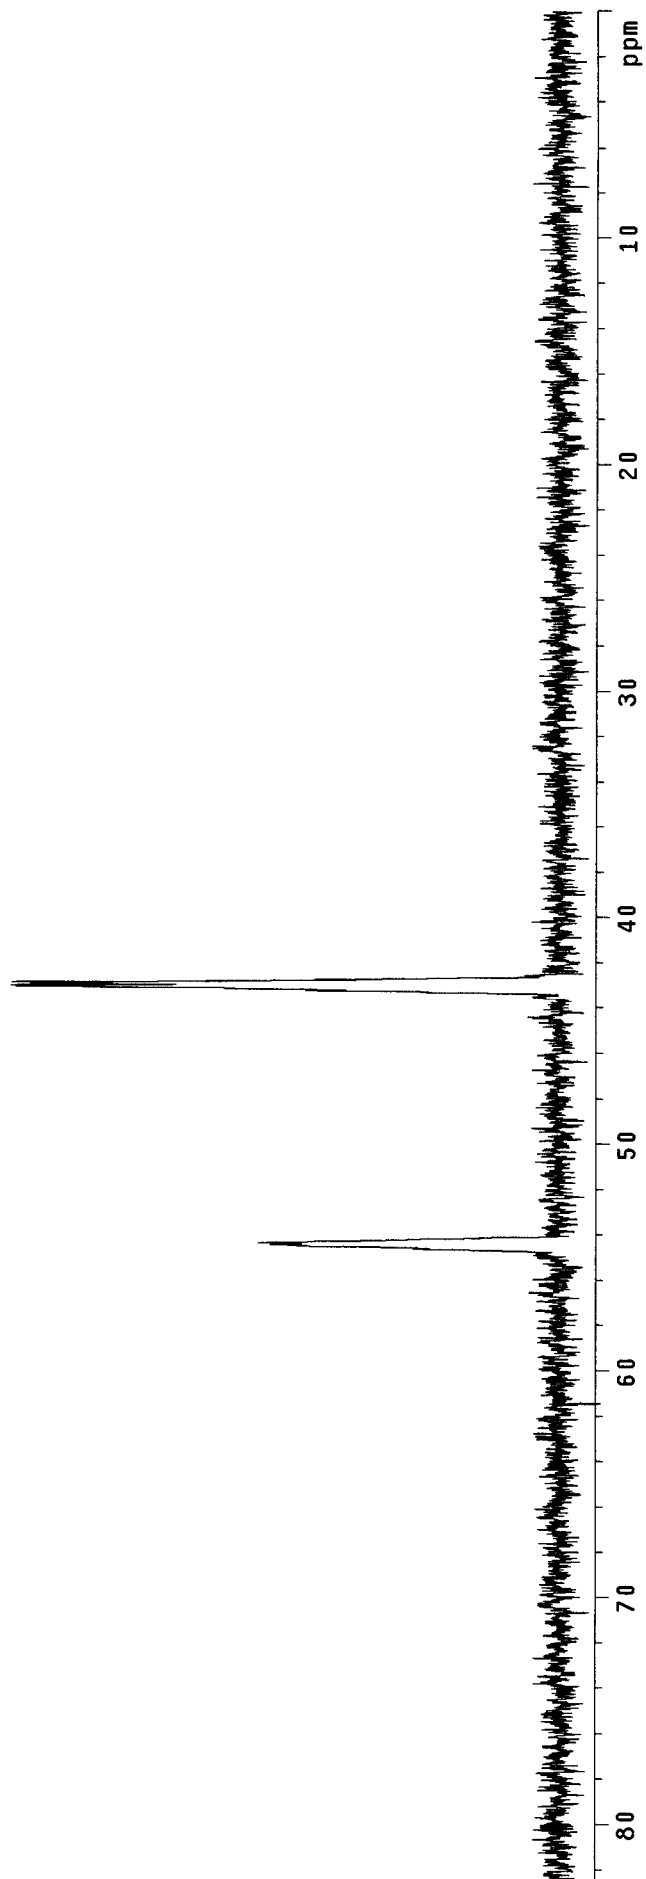

# $^1\text{H-NMR}$

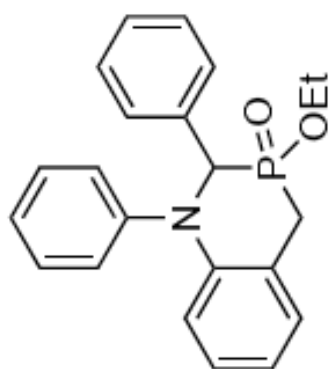

Table 2, entry 7

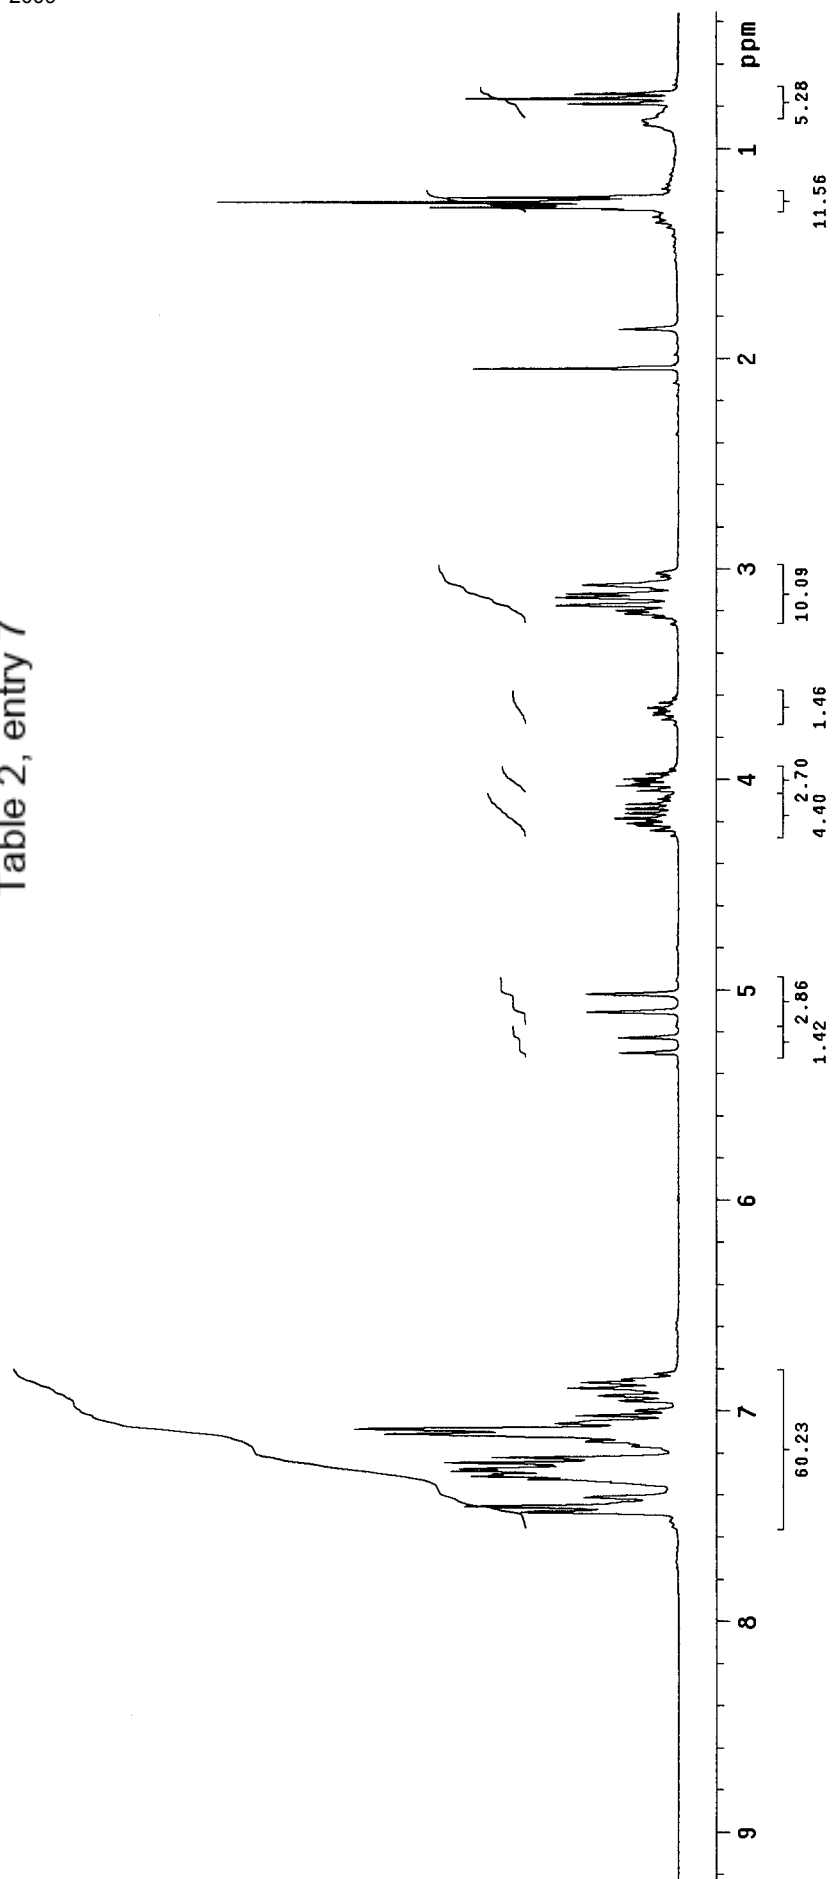

<sup>13</sup>C-NMR

| INDEX | FREQUENCY | PPM     | HEIGHT | INDEX | FREQUENCY | PPM     | HEIGHT |
|-------|-----------|---------|--------|-------|-----------|---------|--------|
| 1     | 11262.640 | 149.277 | 19.9   | 40    | 9175.641  | 121.616 | 21.1   |
| 2     | 11258.322 | 149.220 | 18.4   | 41    | 9169.307  | 121.532 | 21.0   |
| 3     | 11210.530 | 148.586 | 9.5    | 42    | 9125.258  | 120.948 | 27.4   |
| 4     | 11204.772 | 148.510 | 9.1    | 43    | 8850.888  | 117.311 | 56.8   |
| 5     | 10811.786 | 143.301 | 15.8   | 44    | 5883.485  | 77.981  | 24.9   |
| 6     | 10802.861 | 143.183 | 15.5   | 45    | 5851.528  | 77.557  | 25.9   |
| 7     | 10443.560 | 138.421 | 17.9   | 46    | 5819.283  | 77.130  | 25.3   |
| 8     | 10310.837 | 136.662 | 21.4   | 47    | 4817.961  | 63.858  | 14.1   |
| 9     | 10305.655 | 136.593 | 20.1   | 48    | 4784.565  | 63.415  | 31.1   |
| 10    | 9986.660  | 132.365 | 37.6   | 49    | 4722.954  | 62.599  | 14.5   |
| 11    | 9974.856  | 132.209 | 36.8   | 50    | 4693.588  | 62.210  | 30.7   |
| 12    | 8877.545  | 130.919 | 18.6   | 51    | 4660.767  | 61.775  | 15.4   |
| 13    | 9870.348  | 130.823 | 18.6   | 52    | 4653.857  | 61.683  | 18.2   |
| 14    | 9785.129  | 129.694 | 136.9  | 53    | 4650.690  | 61.641  | 28.4   |
| 15    | 9749.429  | 129.221 | 71.8   | 54    | 4644.069  | 61.553  | 27.1   |
| 16    | 9746.262  | 129.179 | 52.7   | 55    | 2421.180  | 32.091  | 15.5   |
| 17    | 9744.535  | 129.156 | 48.2   | 56    | 2348.053  | 31.122  | 48.3   |
| 18    | 9731.579  | 128.984 | 89.2   | 57    | 2337.400  | 30.980  | 15.6   |
| 19    | 9729.852  | 128.961 | 89.0   | 58    | 2229.437  | 29.549  | 10.5   |
| 20    | 9698.183  | 128.541 | 23.5   | 59    | 2199.495  | 29.153  | 33.9   |
| 21    | 9696.455  | 128.519 | 23.3   | 60    | 2113.413  | 28.012  | 33.9   |
| 22    | 9677.166  | 128.263 | 68.3   | 61    | 1266.982  | 16.793  | 28.9   |
| 23    | 9647.512  | 127.870 | 61.3   | 62    | 1261.224  | 16.716  | 28.3   |
| 24    | 9645.209  | 127.839 | 44.3   | 63    | 1237.328  | 16.400  | 14.4   |
| 25    | 9606.054  | 127.320 | 80.1   | 64    | 1232.146  | 16.331  | 13.9   |
| 26    | 9601.735  | 127.263 | 78.3   |       |           |         |        |
| 27    | 9573.233  | 126.885 | 39.1   |       |           |         |        |
| 28    | 9569.490  | 126.836 | 38.7   |       |           |         |        |
| 29    | 9536.247  | 126.660 | 11.4   |       |           |         |        |
| 30    | 9546.170  | 126.527 | 10.1   |       |           |         |        |
| 31    | 9490.605  | 125.790 | 19.6   |       |           |         |        |
| 32    | 9488.014  | 125.756 | 19.3   |       |           |         |        |
| 33    | 9436.192  | 125.069 | 31.5   |       |           |         |        |
| 34    | 9309.603  | 123.394 | 62.1   |       |           |         |        |
| 35    | 9231.494  | 122.356 | 45.2   |       |           |         |        |
| 36    | 9229.479  | 122.329 | 45.3   |       |           |         |        |
| 37    | 9222.569  | 122.238 | 49.9   |       |           |         |        |
| 38    | 9221.705  | 122.226 | 50.2   |       |           |         |        |
| 39    | 9201.552  | 121.959 | 127.7  |       |           |         |        |

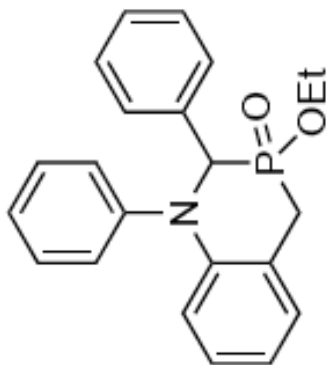

Table 2, entry 7

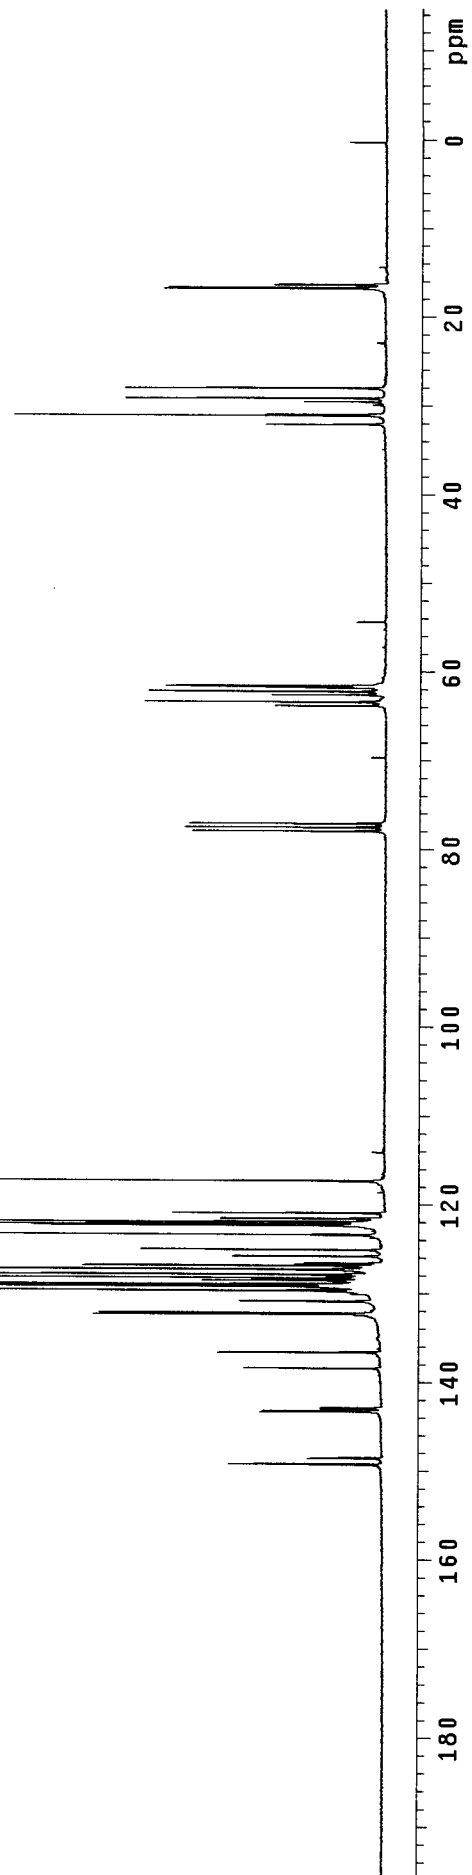

| INDEX | FREQUENCY | PPM    | HEIGHT |
|-------|-----------|--------|--------|
| 1     | 6952.530  | 57.240 | 99.9   |

<sup>31</sup>P-NMR (<sup>1</sup>H decoupled)

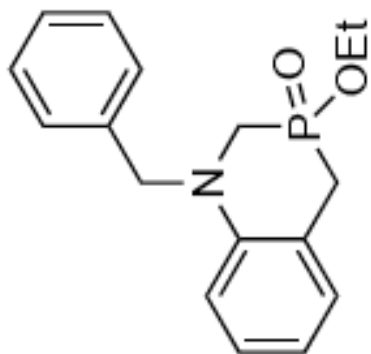

Table 2, entry 8

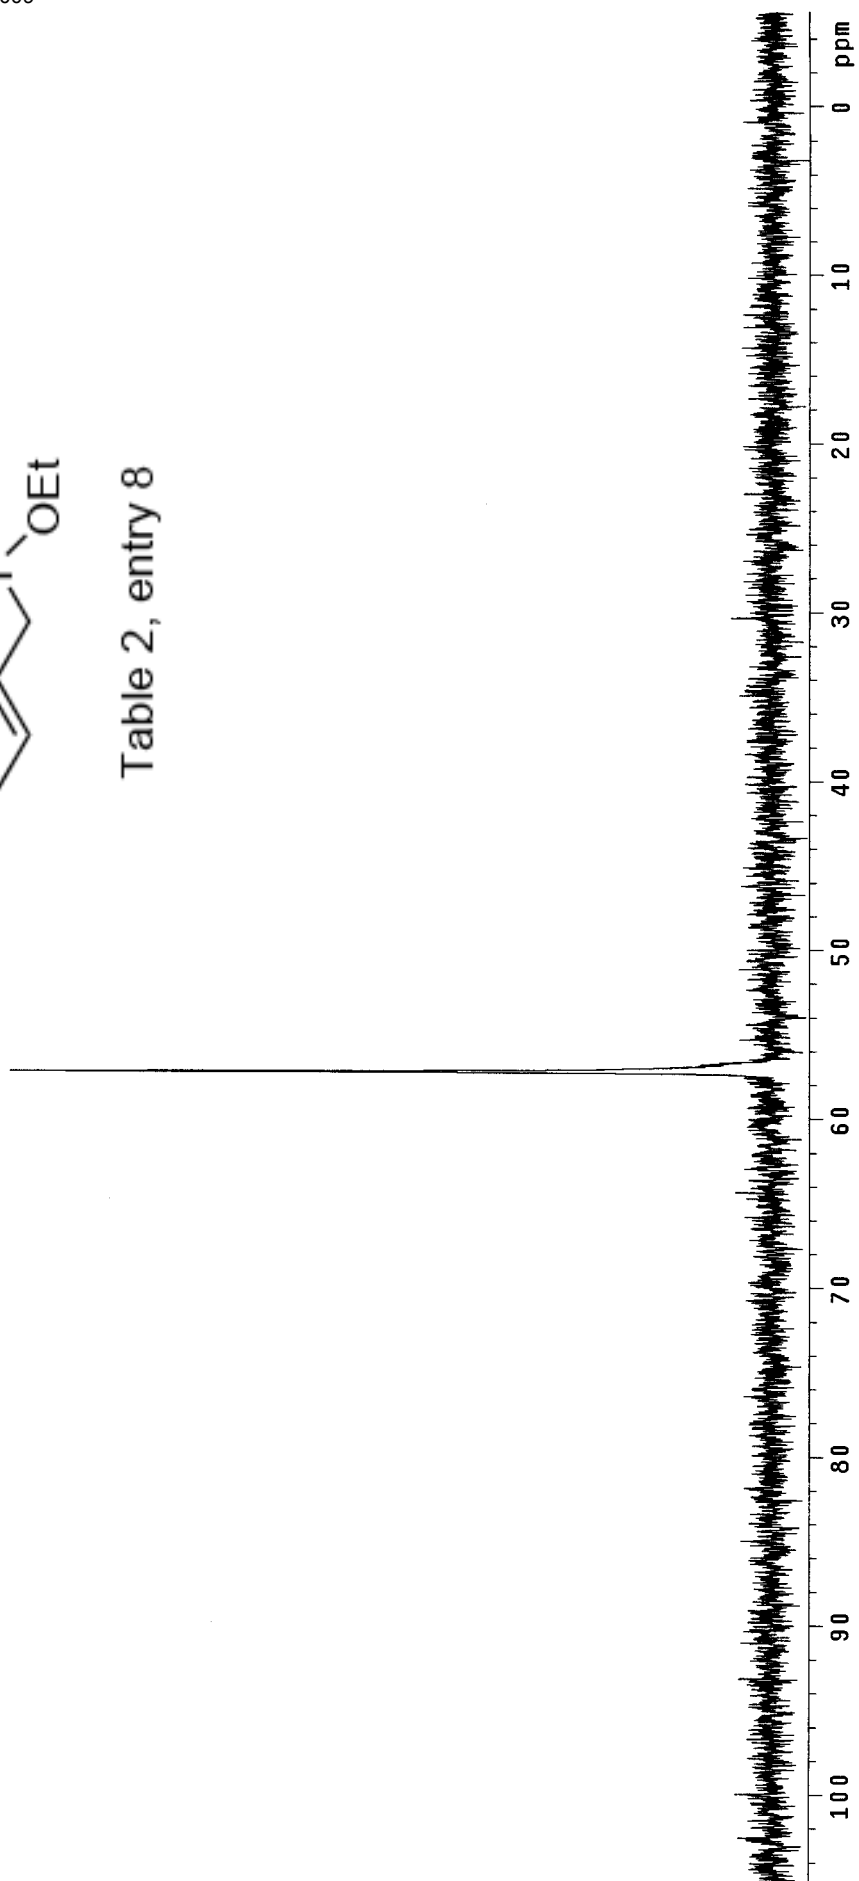



| INDEX | FREQUENCY PPM | HEIGHT |
|-------|---------------|--------|
| 1     | 6954.162      | 57.253 |
|       |               | 31.8   |

<sup>31</sup>P-NMR (<sup>1</sup>H coupled)

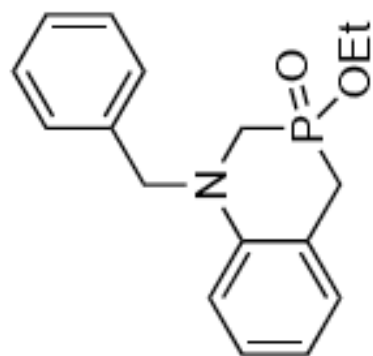

Table 2, entry 8

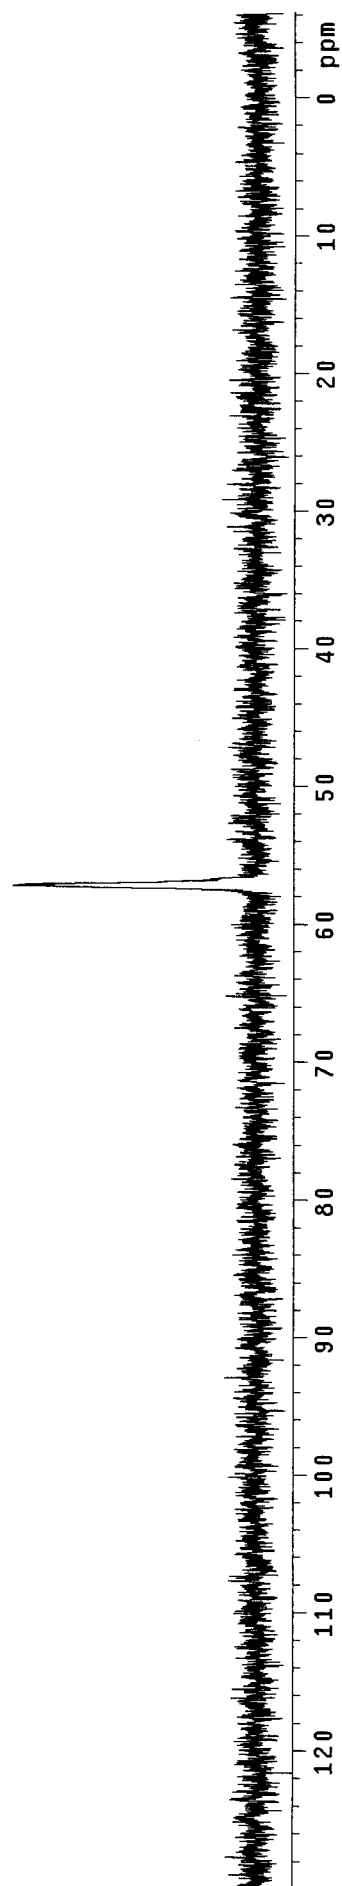

# <sup>1</sup>H-NMR

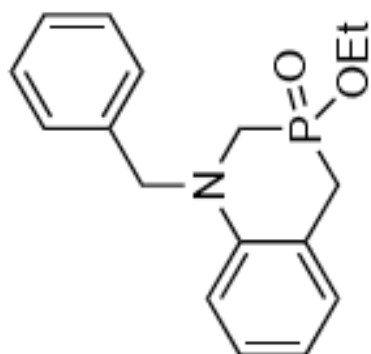

Table 2, entry 8

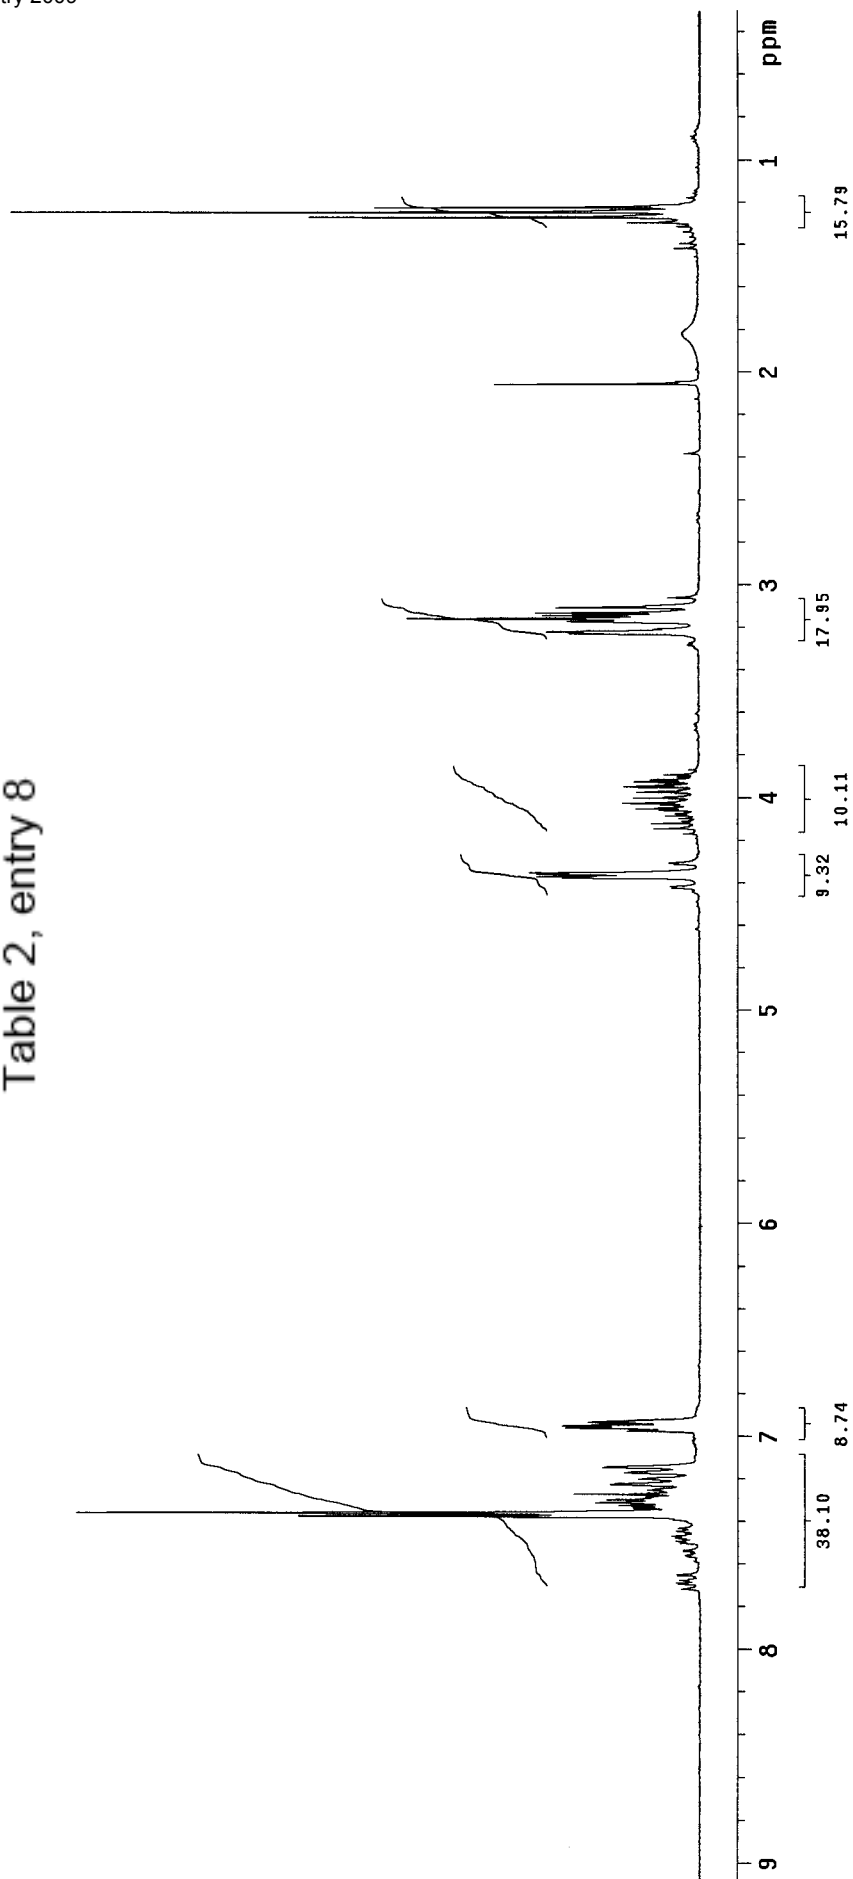

<sup>13</sup>C-NMR

| INDEX | FREQUENCY PPM | HEIGHT  |
|-------|---------------|---------|
| 1     | 11196.423     | 148.399 |
| 2     | 11192.104     | 148.342 |
| 3     | 10362.947     | 137.352 |
| 4     | 9988.387      | 132.388 |
| 5     | 9978.311      | 132.254 |
| 6     | 9974.280      | 132.201 |
| 7     | 9891.652      | 131.106 |
| 8     | 9881.000      | 130.965 |
| 9     | 9729.852      | 128.961 |
| 10    | 9721.215      | 128.847 |
| 11    | 9709.123      | 128.686 |
| 12    | 9703.365      | 128.610 |
| 13    | 9693.864      | 128.484 |
| 14    | 9690.697      | 128.442 |
| 15    | 9688.970      | 128.419 |
| 16    | 9648.951      | 127.889 |
| 17    | 9286.195      | 123.081 |
| 18    | 9278.710      | 122.982 |
| 19    | 9197.234      | 121.902 |
| 20    | 8751.850      | 115.999 |
| 21    | 8749.546      | 115.968 |
| 22    | 5873.697      | 77.851  |
| 23    | 5841.452      | 77.424  |
| 24    | 5809.495      | 77.000  |
| 25    | 4604.914      | 61.034  |
| 26    | 4588.232      | 60.947  |
| 27    | 4319.891      | 57.257  |
| 28    | 4306.072      | 57.073  |
| 29    | 3699.751      | 49.037  |
| 30    | 3588.333      | 47.560  |
| 31    | 2428.089      | 32.182  |
| 32    | 2340.855      | 31.026  |
| 33    | 1265.542      | 16.774  |
| 34    | 1259.784      | 16.697  |

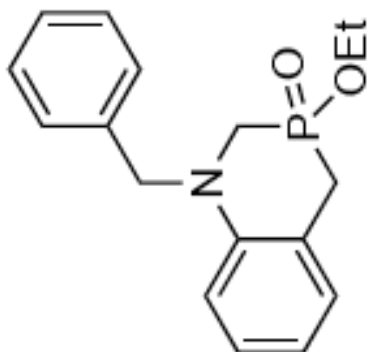

Table 2, entry 8

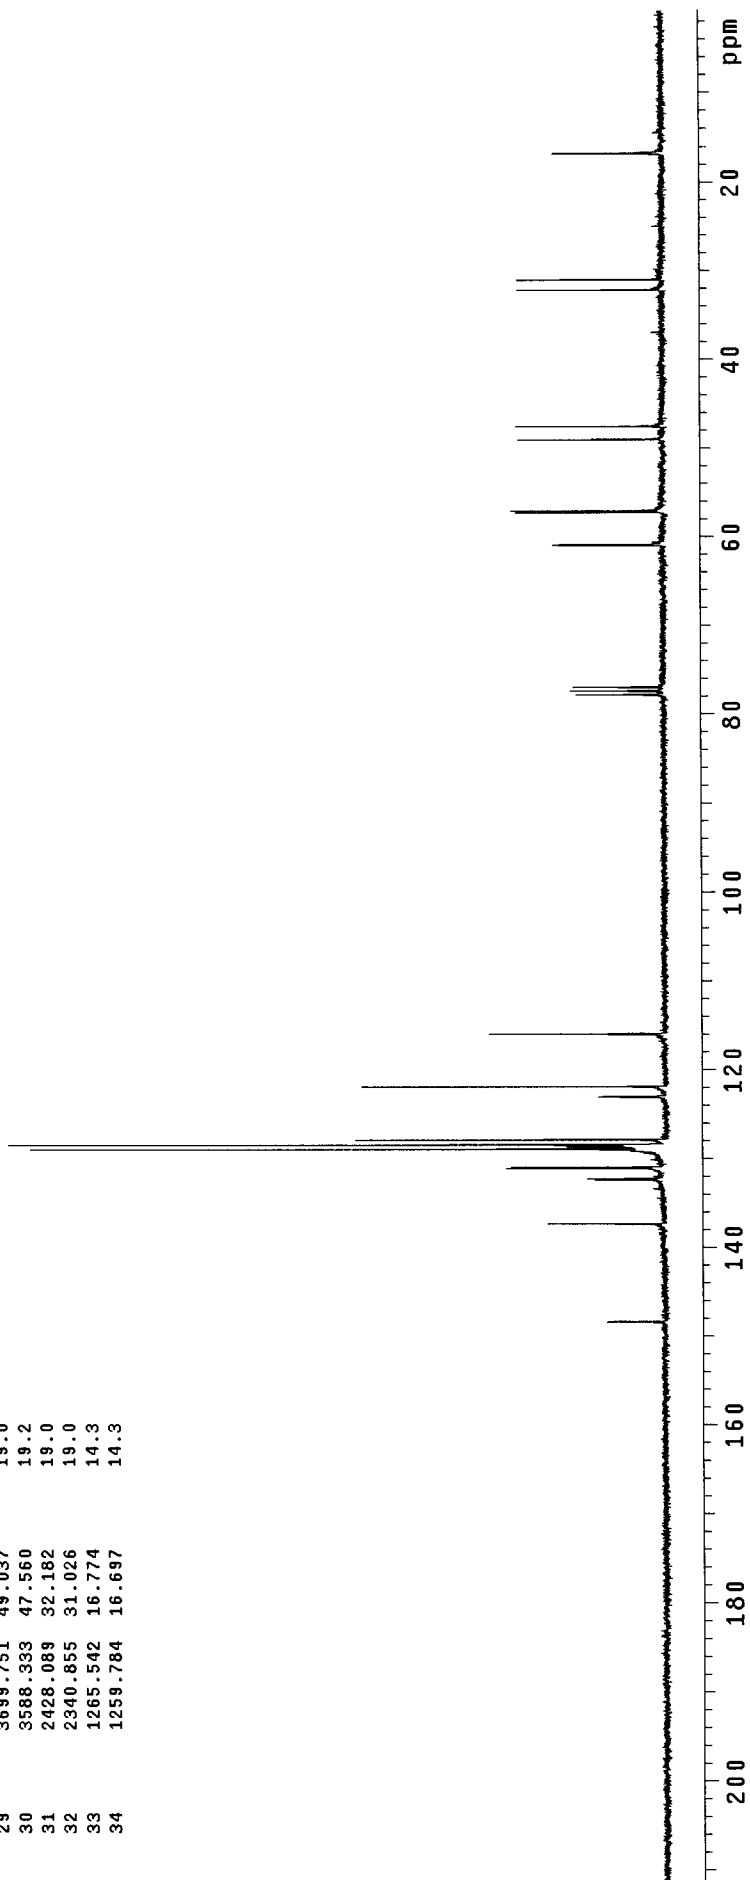

| INDEX | FREQUENCY | PPM    | HEIGHT |
|-------|-----------|--------|--------|
| 1     | 4463.389  | 36.747 | 25.8   |

<sup>31</sup>P-NMR (<sup>1</sup>H decoupled)

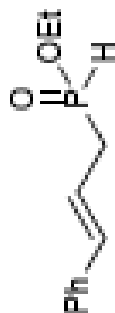

8 (Scheme 5)

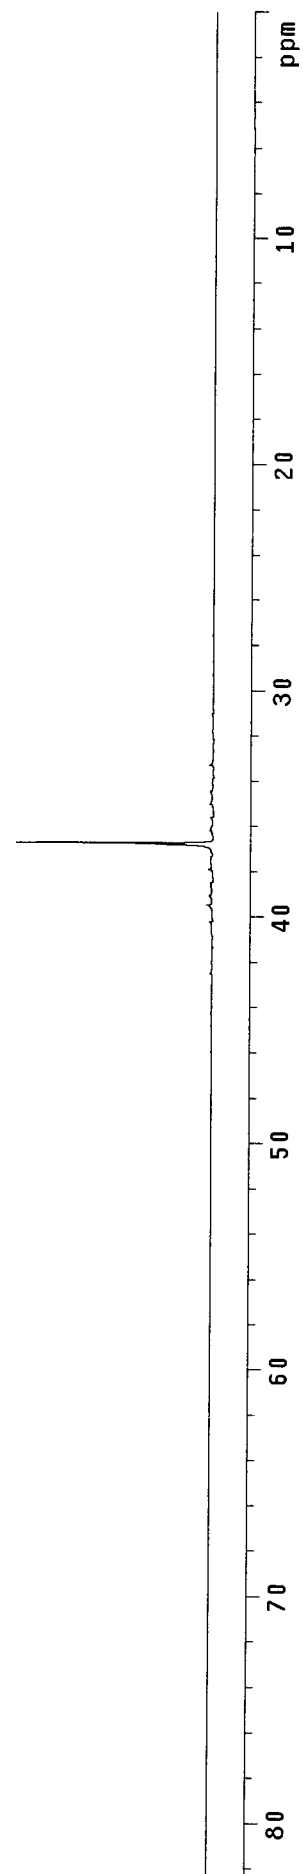

| INDEX | FREQUENCY | PPM    | HEIGHT |
|-------|-----------|--------|--------|
| 1     | 4744.901  | 39.065 | 23.8   |
| 2     | 4736.742  | 38.997 | 26.2   |
| 3     | 4729.398  | 38.937 | 20.4   |
| 4     | 4218.596  | 34.732 | 12.6   |
| 5     | 4200.644  | 34.584 | 23.1   |
| 6     | 4192.892  | 34.520 | 25.8   |
| 7     | 4185.549  | 34.460 | 20.8   |

<sup>31</sup>P-NMR (1H coupled)

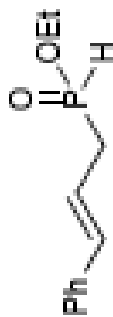

**8** (Scheme 5)

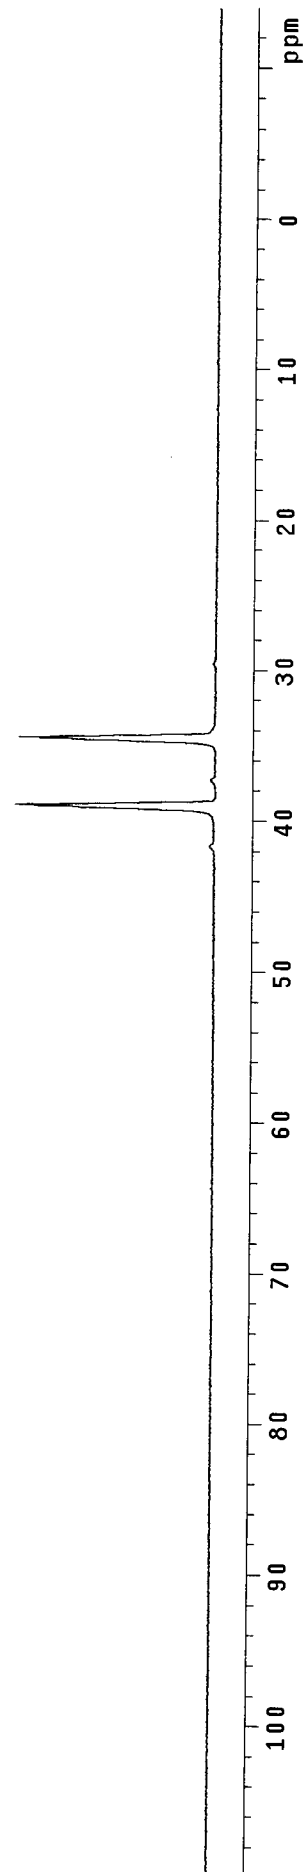

# <sup>1</sup>H-NMR

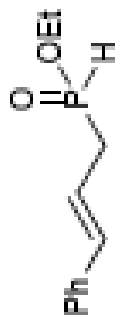

**8** (Scheme 5)

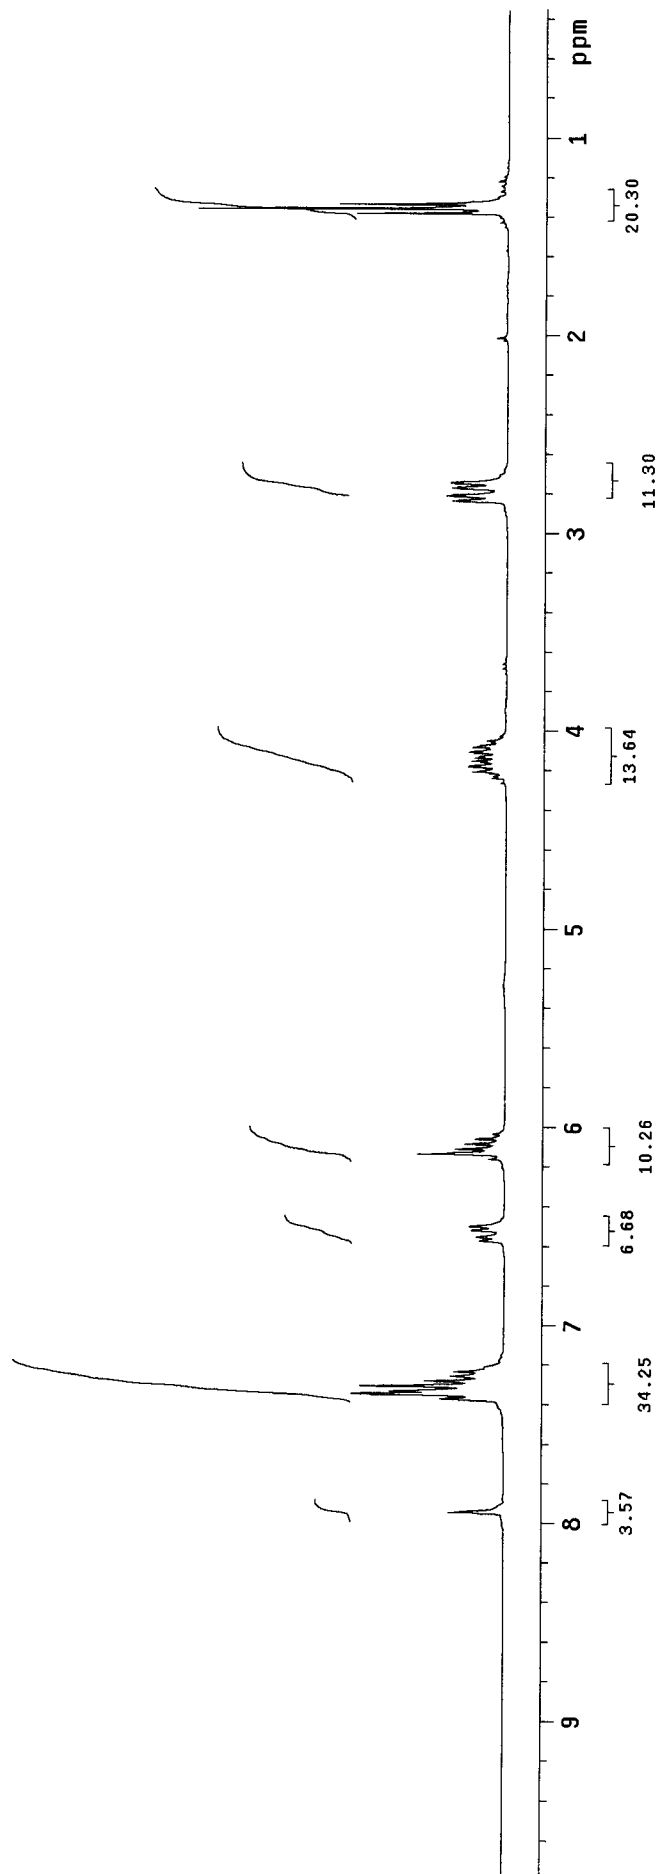

# <sup>13</sup>C-NMR

| INDEX | FREQUENCY | PPM     | HEIGHT |
|-------|-----------|---------|--------|
| 1     | 10311.125 | 136.666 | 10.3   |
| 2     | 10306.807 | 136.608 | 9.3    |
| 3     | 10275.713 | 136.196 | 25.6   |
| 4     | 10261.318 | 136.005 | 25.9   |
| 5     | 9717.760  | 128.801 | 72.9   |
| 6     | 9716.896  | 128.790 | 71.0   |
| 7     | 9708.547  | 128.679 | 6.5    |
| 8     | 9661.043  | 128.048 | 37.2   |
| 9     | 9659.892  | 128.034 | 35.8   |
| 10    | 9542.140  | 126.473 | 61.2   |
| 11    | 9539.837  | 126.443 | 59.6   |
| 12    | 8822.673  | 116.937 | 25.2   |
| 13    | 8812.597  | 116.804 | 24.9   |
| 14    | 5886.076  | 78.015  | 7.8    |
| 15    | 5854.119  | 77.592  | 7.9    |
| 16    | 5821.874  | 77.164  | 8.4    |
| 17    | 4743.107  | 62.866  | 16.2   |
| 18    | 4735.909  | 62.771  | 16.6   |
| 19    | 2627.605  | 34.827  | 28.9   |
| 20    | 2537.204  | 33.629  | 28.9   |
| 21    | 1248.844  | 16.552  | 19.4   |
| 22    | 1242.798  | 16.472  | 19.2   |

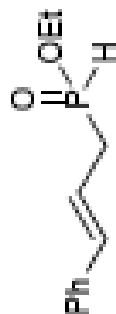

**8 (Scheme 5)**

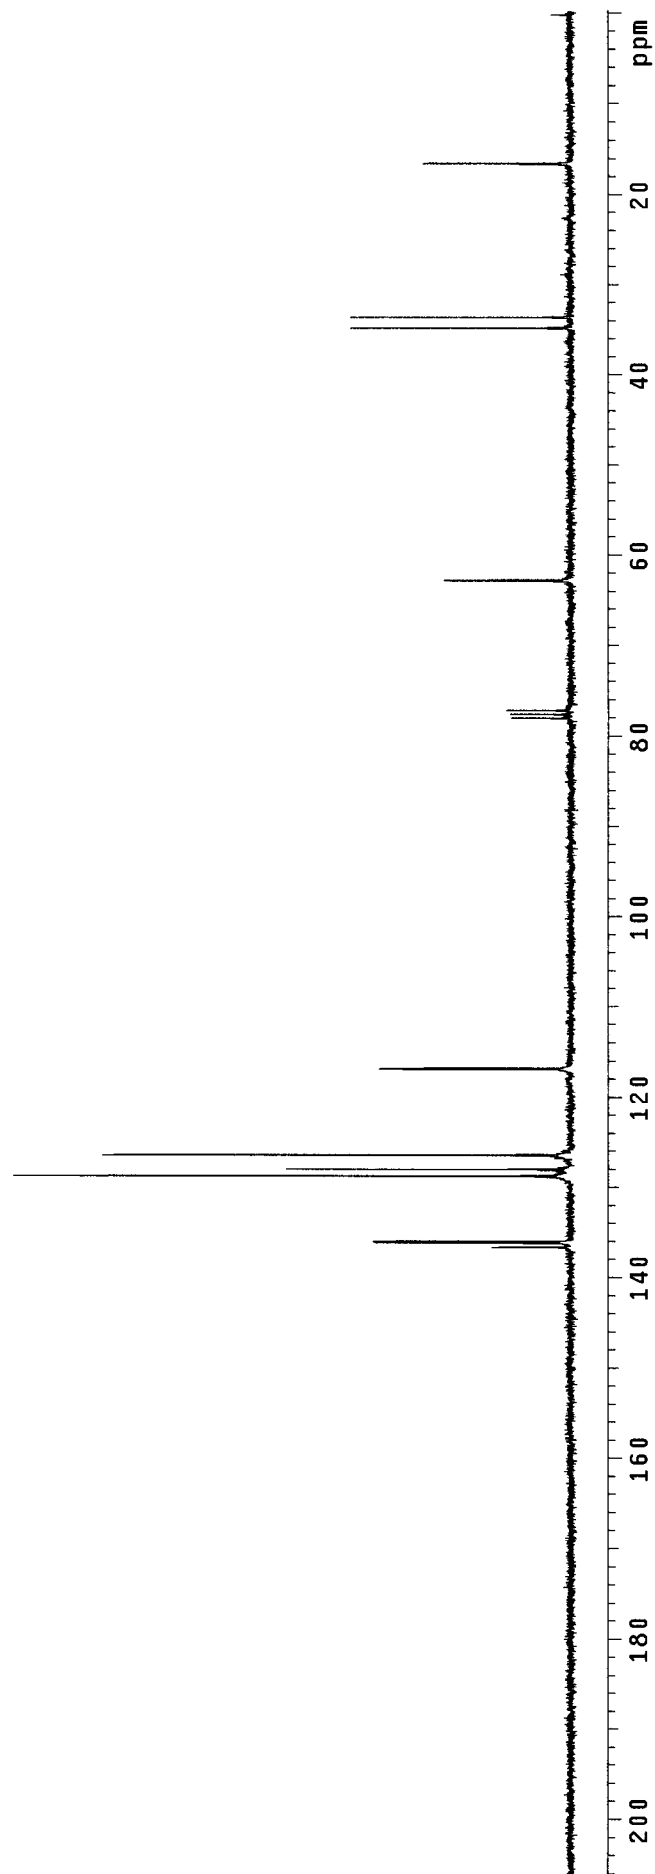

| INDEX | FREQUENCY | PPM    | HEIGHT |
|-------|-----------|--------|--------|
| 1     | 5914.198  | 48.691 | 49.8   |

<sup>31</sup>P-NMR (<sup>1</sup>H decoupled)

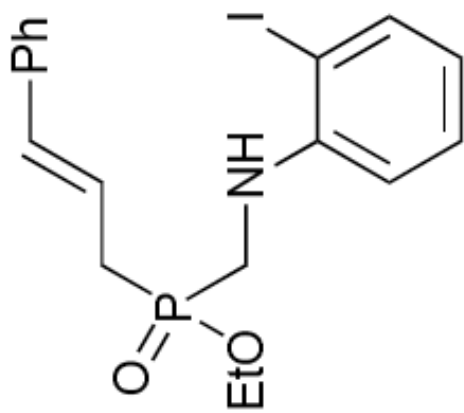

**9** (Scheme 5)

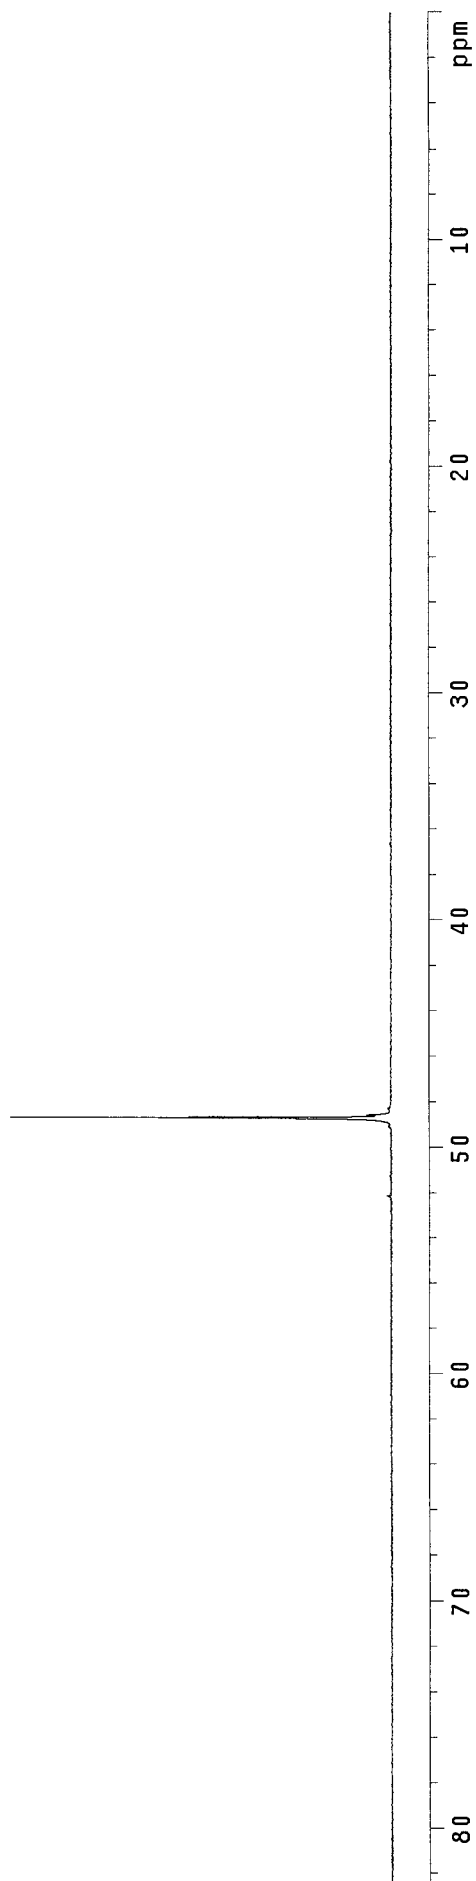



| INDEX | FREQUENCY | PPM    | HEIGHT |
|-------|-----------|--------|--------|
| 1     | 5919.094  | 48.732 | 39.9   |
| 2     | 5913.382  | 48.685 | 39.0   |

$^{31}\text{P}$ -NMR ( $^1\text{H}$  coupled)

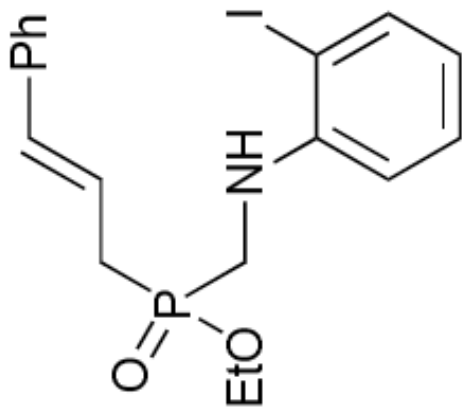

**9** (Scheme 5)

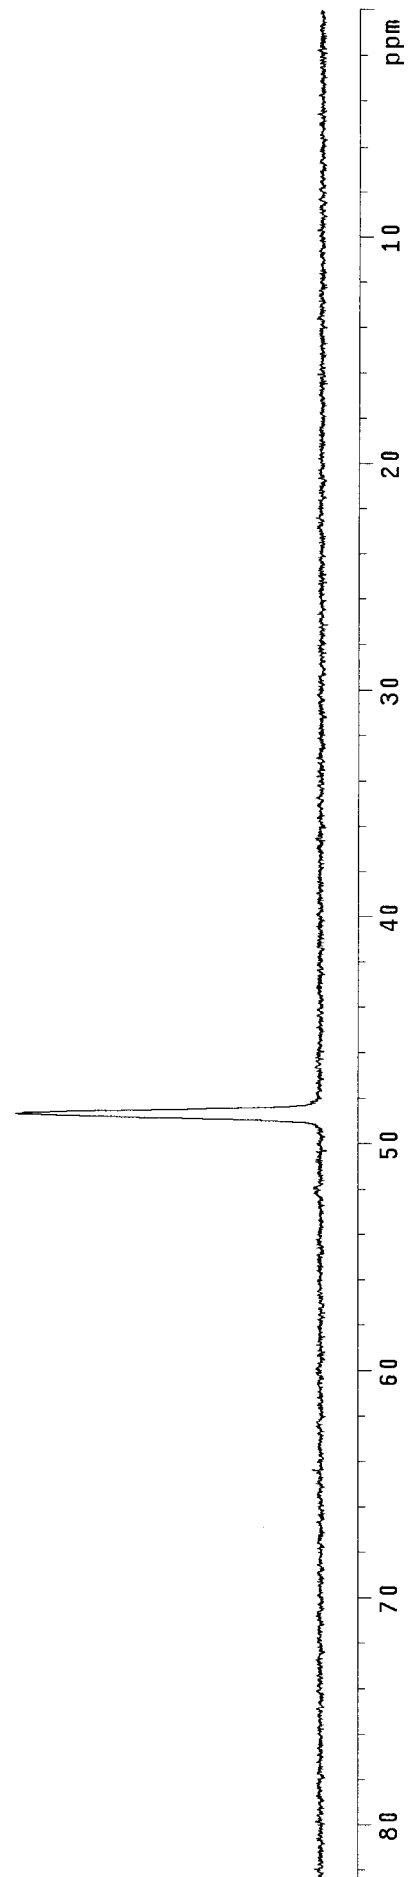

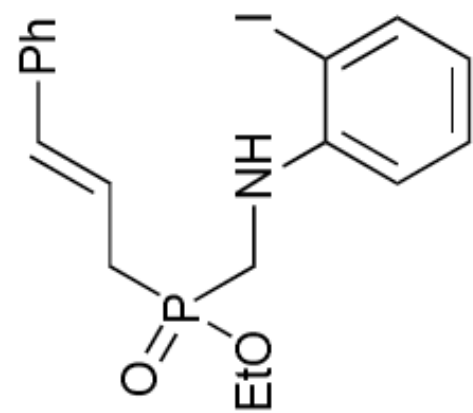

**9** (Scheme 5)

**<sup>1</sup>H-NMR**

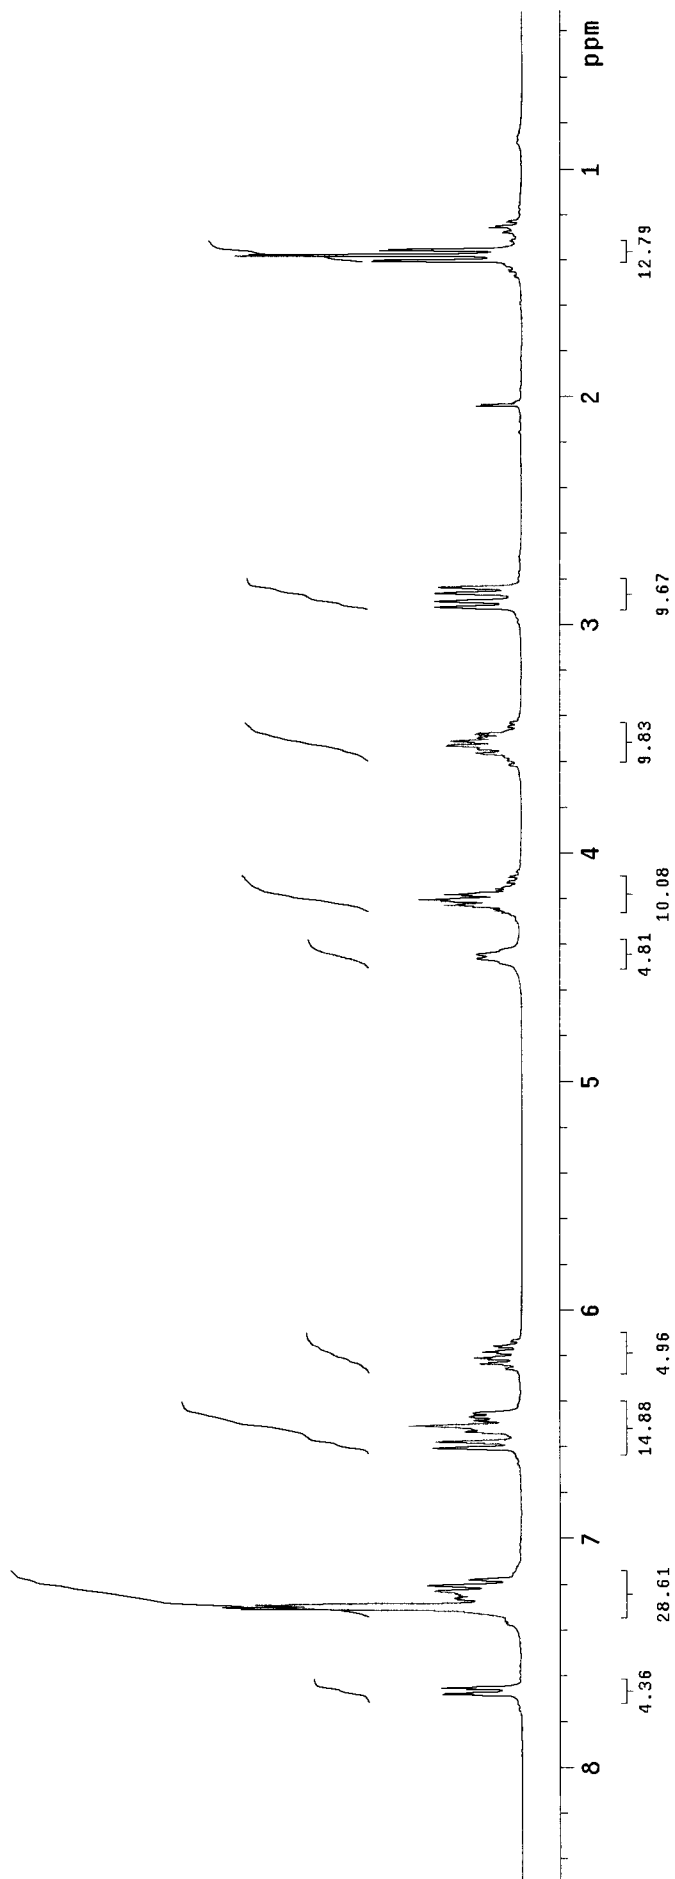

# <sup>13</sup>C-NMR

| INDEX | FREQUENCY | PPM     | HEIGHT |
|-------|-----------|---------|--------|
| 1     | 11073.777 | 146.774 | 10.7   |
| 2     | 11064.276 | 146.648 | 10.6   |
| 3     | 10519.566 | 139.428 | 62.4   |
| 4     | 10316.883 | 136.742 | 10.9   |
| 5     | 10313.716 | 136.700 | 10.4   |
| 6     | 10249.226 | 135.845 | 31.9   |
| 7     | 10235.983 | 135.670 | 30.0   |
| 8     | 9781.175  | 129.774 | 58.7   |
| 9     | 9718.911  | 128.816 | 91.3   |
| 10    | 9719.487  | 128.824 | 91.4   |
| 11    | 9661.043  | 128.049 | 41.6   |
| 12    | 9549.337  | 126.569 | 71.5   |
| 13    | 9547.322  | 126.542 | 72.1   |
| 14    | 9070.845  | 120.227 | 54.6   |
| 15    | 8824.879  | 118.292 | 27.5   |
| 16    | 8915.378  | 118.166 | 28.1   |
| 17    | 8406.080  | 111.416 | 51.2   |
| 18    | 6507.656  | 86.254  | 16.0   |
| 19    | 5869.954  | 77.801  | 23.3   |
| 20    | 5837.997  | 77.378  | 24.7   |
| 21    | 5806.040  | 76.954  | 24.1   |
| 22    | 4667.676  | 61.866  | 20.4   |
| 23    | 4660.767  | 61.775  | 20.9   |
| 24    | 3189.013  | 42.268  | 23.0   |
| 25    | 3088.536  | 40.936  | 23.6   |
| 26    | 2519.354  | 33.392  | 25.4   |
| 27    | 2429.817  | 32.205  | 25.8   |
| 28    | 1287.999  | 17.071  | 22.4   |
| 29    | 1282.528  | 16.999  | 23.6   |
| 30    | 22.095    | 0.293   | 5.5    |

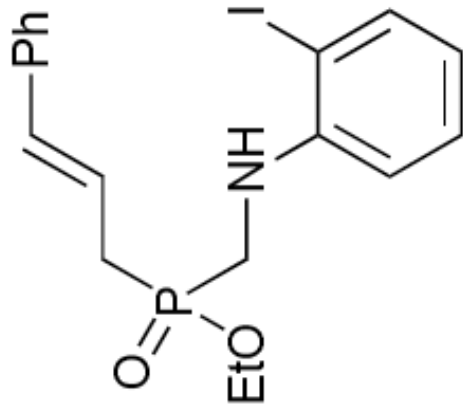

**9** (Scheme 5)

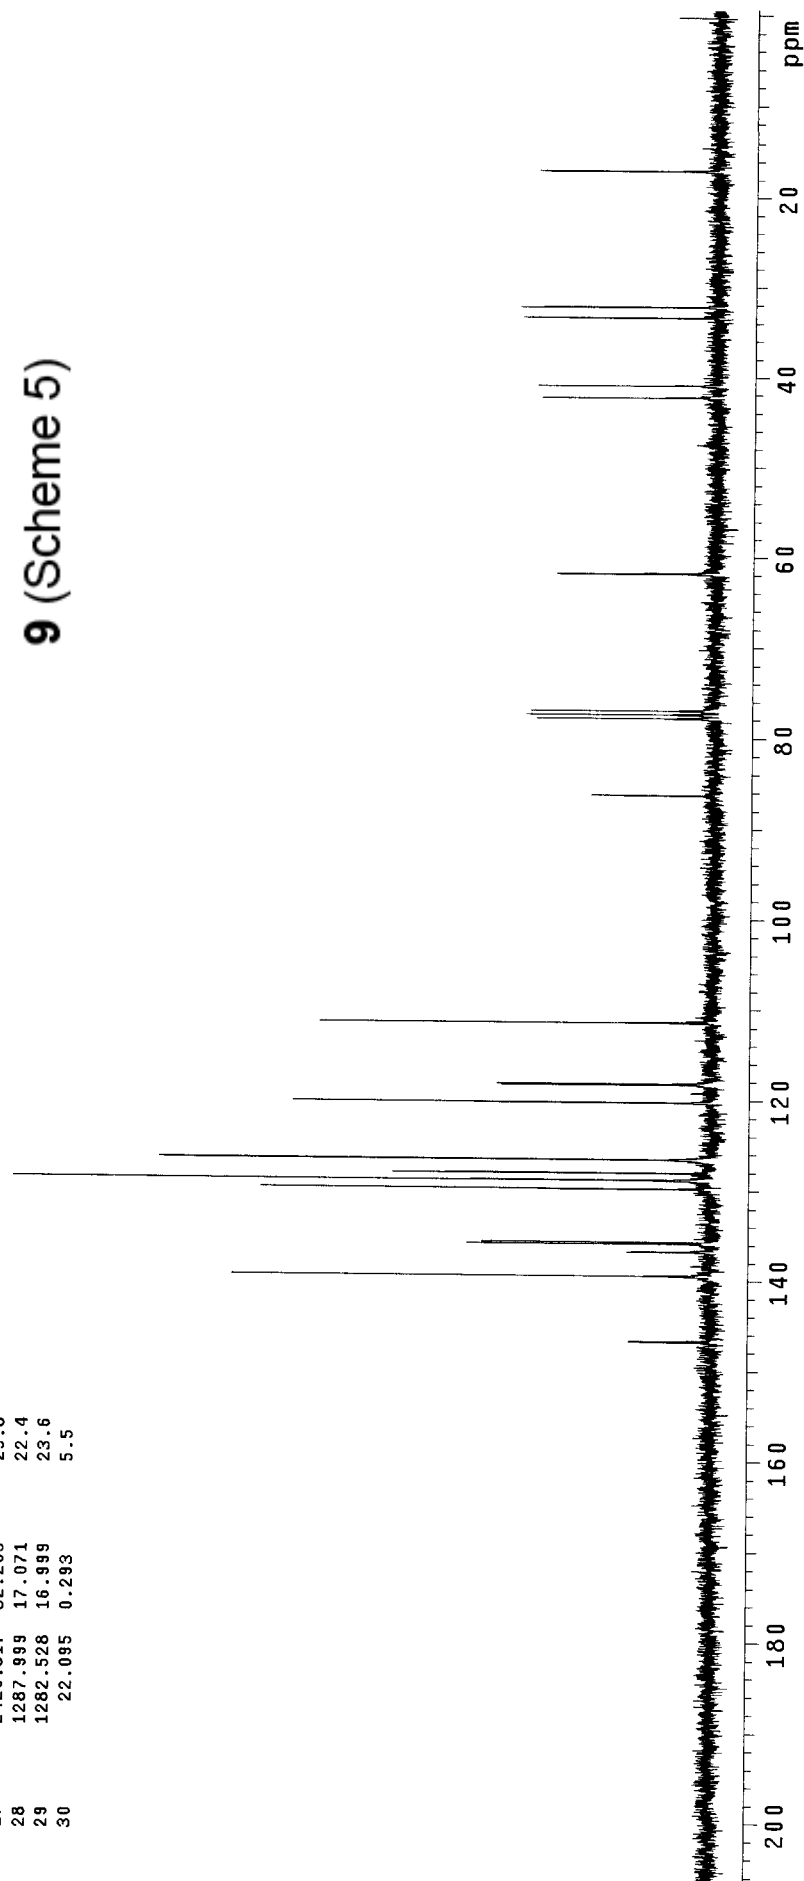

| INDEX | FREQUENCY PPM | HEIGHT |
|-------|---------------|--------|
| 1     | 6580.852      | 61.2   |

$^{31}\text{P}$ -NMR ( $^1\text{H}$  decoupled)

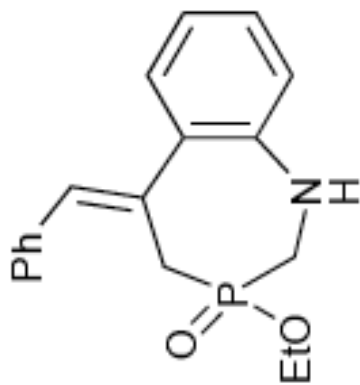

**10** (Scheme 5)

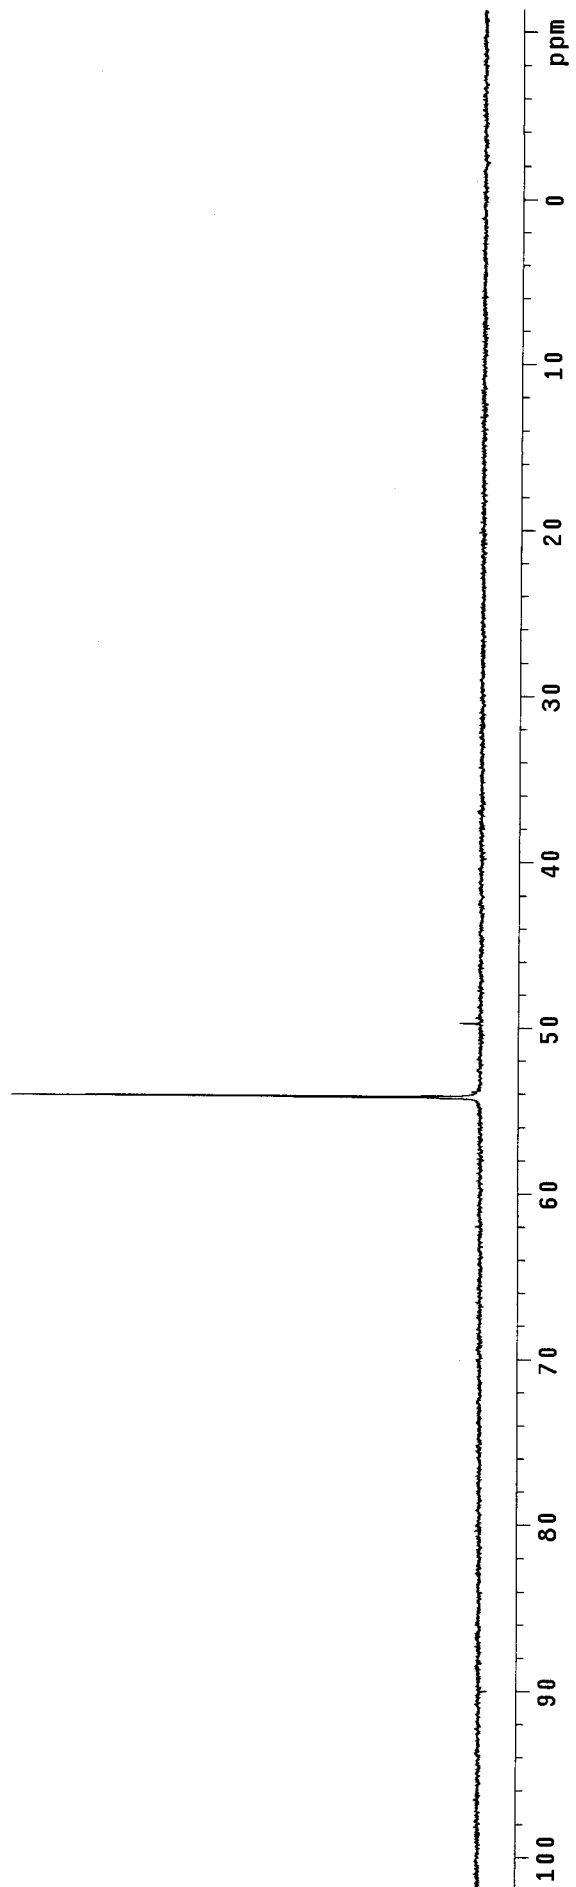

| INDEX | FREQUENCY PPM | HEIGHT |
|-------|---------------|--------|
| 1     | 6580.036      | 41.9   |

<sup>31</sup>P-NMR (<sup>1</sup>H coupled)

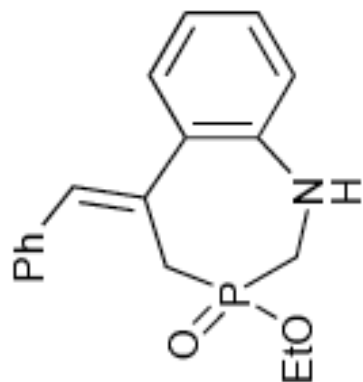

**10** (Scheme 5)

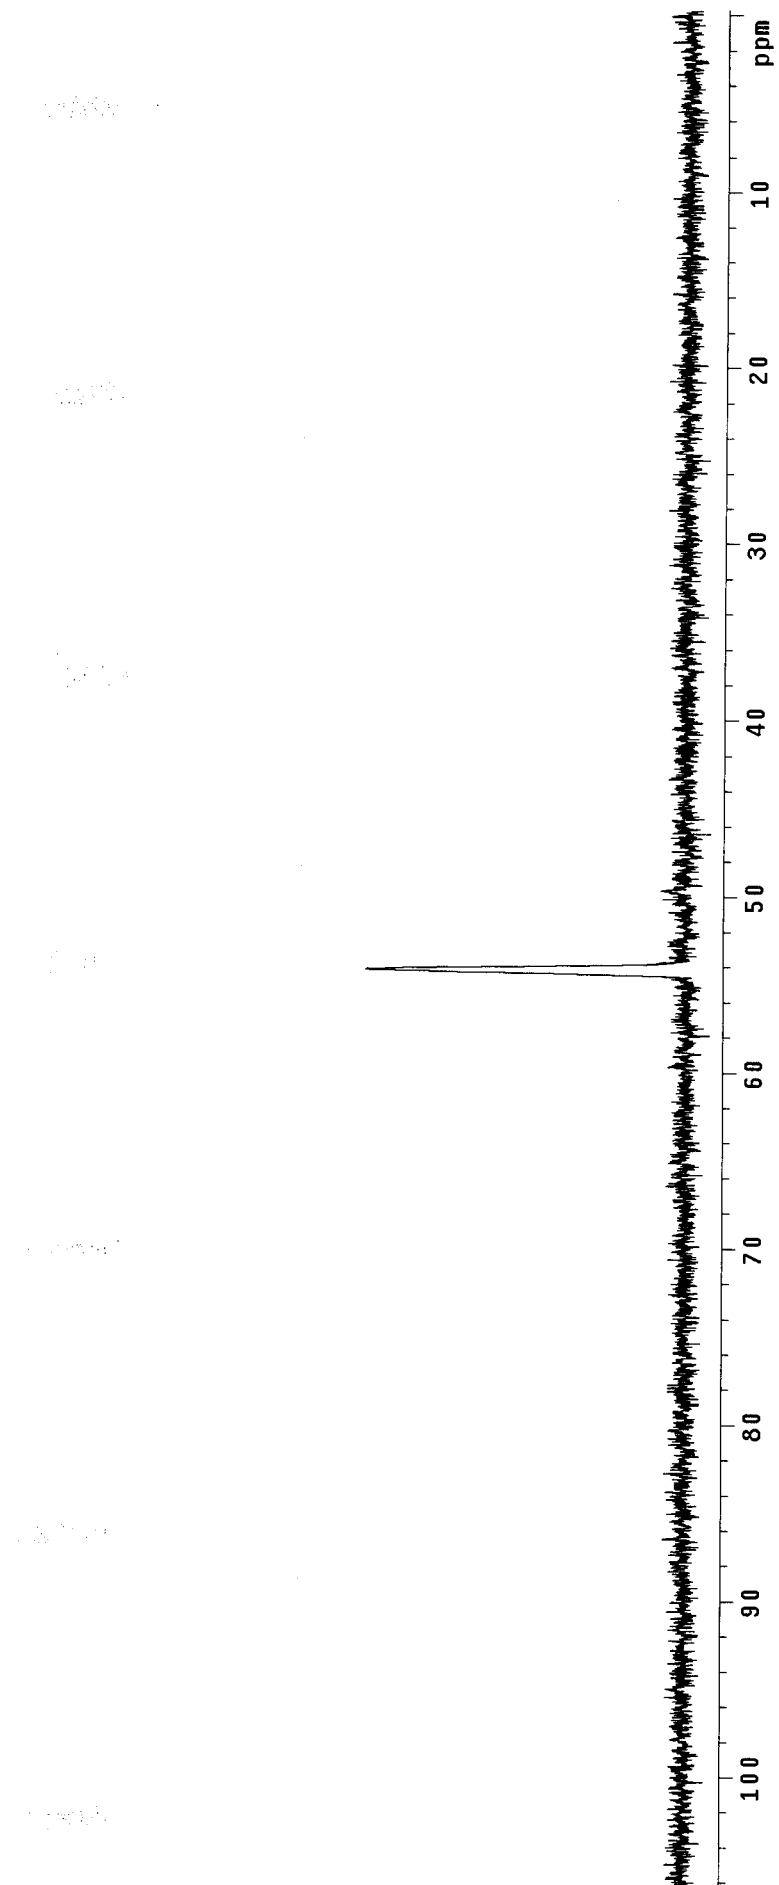

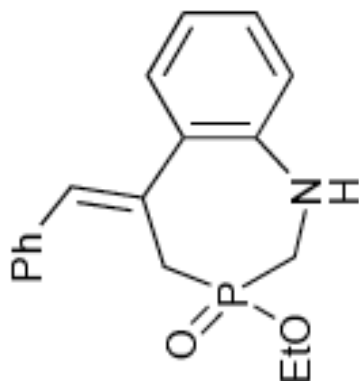

10 (Scheme 5)

**<sup>1</sup>H-NMR**

| INDEX | FREQUENCY PPM | HEIGHT | INDEX | FREQUENCY PPM | HEIGHT |
|-------|---------------|--------|-------|---------------|--------|
| 1     | 2261.115      | 15.9   | 40    | 320.713       | 1.069  |
| 2     | 2253.493      | 22.5   |       |               | 21.0   |
| 3     | 2230.627      | 12.9   |       |               |        |
| 4     | 2223.005      | 20.5   |       |               |        |
| 5     | 2216.555      | 10.9   |       |               |        |
| 6     | 2205.122      | 12.4   |       |               |        |
| 7     | 2197.500      | 15.5   |       |               |        |
| 8     | 2181.930      | 9.5    |       |               |        |
| 9     | 2183.722      | 11.9   |       |               |        |
| 10    | 2181.670      | 13.1   |       |               |        |
| 11    | 2179.031      | 15.9   |       |               |        |
| 12    | 2140.042      | 10.6   |       |               |        |
| 13    | 2131.833      | 6.2    |       |               |        |
| 14    | 2084.635      | 11.7   |       |               |        |
| 15    | 2079.651      | 10.4   |       |               |        |
| 16    | 2062.062      | 6.9    |       |               |        |
| 17    | 2054.733      | 10.5   |       |               |        |
| 18    | 2005.190      | 12.9   |       |               |        |
| 19    | 1997.274      | 11.1   |       |               |        |
| 20    | 1189.922      | 7.3    |       |               |        |
| 21    | 1182.886      | 7.1    |       |               |        |
| 22    | 1096.405      | 10.3   |       |               |        |
| 23    | 1078.815      | 9.7    |       |               |        |
| 24    | 1064.451      | 8.9    |       |               |        |
| 25    | 1058.294      | 7.6    |       |               |        |
| 26    | 1044.223      | 7.2    |       |               |        |
| 27    | 1022.823      | 7.4    |       |               |        |
| 28    | 1015.787      | 7.1    |       |               |        |
| 29    | 976.211       | 6.5    |       |               |        |
| 30    | 961.553       | 6.6    |       |               |        |
| 31    | 957.742       | 6.8    |       |               |        |
| 32    | 654.911       | 6.7    |       |               |        |
| 33    | 652.273       | 10.1   |       |               |        |
| 34    | 377.292       | 9.3    |       |               |        |
| 35    | 337.130       | 14.7   |       |               |        |
| 36    | 334.785       | 22.1   |       |               |        |
| 37    | 330.387       | 29.3   |       |               |        |
| 38    | 327.749       | 41.8   |       |               |        |
| 39    | 323.351       | 16.6   |       |               |        |

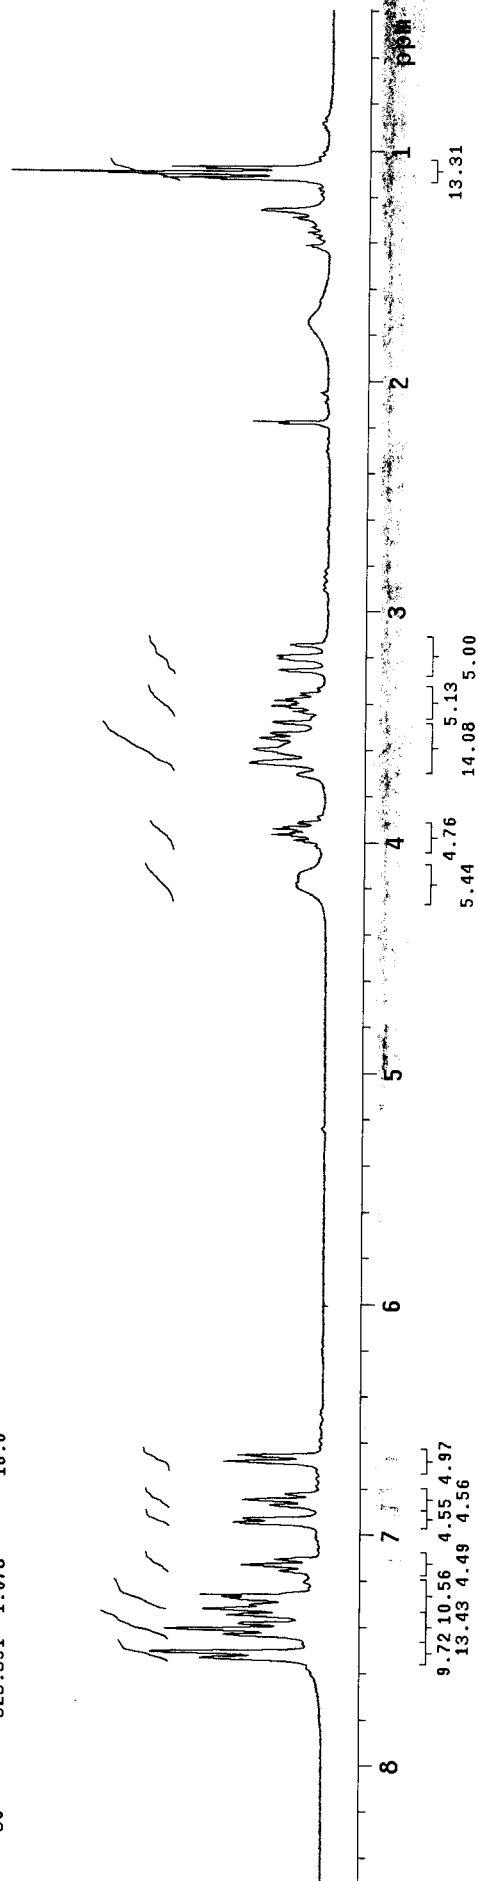

# <sup>13</sup>C-NMR

| INDEX | FREQUENCY | PPM     | HEIGHT |
|-------|-----------|---------|--------|
| 1     | 10983.376 | 145.576 | 7.8    |
| 2     | 10981.072 | 145.545 | 7.2    |
| 3     | 10378.782 | 137.562 | 7.2    |
| 4     | 10375.615 | 137.520 | 7.1    |
| 5     | 10040.786 | 133.082 | 8.1    |
| 6     | 10033.300 | 132.983 | 7.8    |
| 7     | 9962.476  | 132.044 | 13.4   |
| 8     | 9951.248  | 131.896 | 13.5   |
| 9     | 9926.201  | 131.564 | 16.2   |
| 10    | 9924.185  | 131.537 | 14.9   |
| 11    | 9731.003  | 128.976 | 36.5   |
| 12    | 9728.988  | 128.950 | 36.0   |
| 13    | 9724.382  | 128.889 | 29.6   |
| 14    | 9718.336  | 128.809 | 54.7   |
| 15    | 9701.349  | 128.583 | 6.6    |
| 16    | 9698.758  | 128.549 | 6.8    |
| 17    | 9605.766  | 127.317 | 23.6   |
| 18    | 9050.116  | 119.952 | 24.4   |
| 19    | 8928.046  | 118.334 | 18.5   |
| 20    | 8926.318  | 118.311 | 17.3   |
| 21    | 5862.756  | 77.706  | 46.4   |
| 22    | 5630.799  | 77.282  | 47.9   |
| 23    | 5788.842  | 76.859  | 47.8   |
| 24    | 4599.156  | 60.958  | 10.4   |
| 25    | 4592.246  | 60.866  | 10.9   |
| 26    | 3399.470  | 45.957  | 12.4   |
| 27    | 3280.854  | 43.485  | 12.4   |
| 28    | 2405.921  | 31.889  | 11.3   |
| 29    | 2327.899  | 30.854  | 10.6   |
| 30    | 1255.754  | 16.644  | 10.7   |
| 31    | 1249.708  | 16.564  | 10.5   |

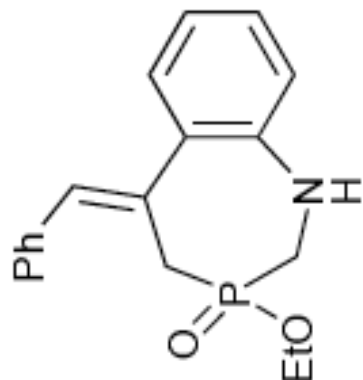

**10 (Scheme 5)**

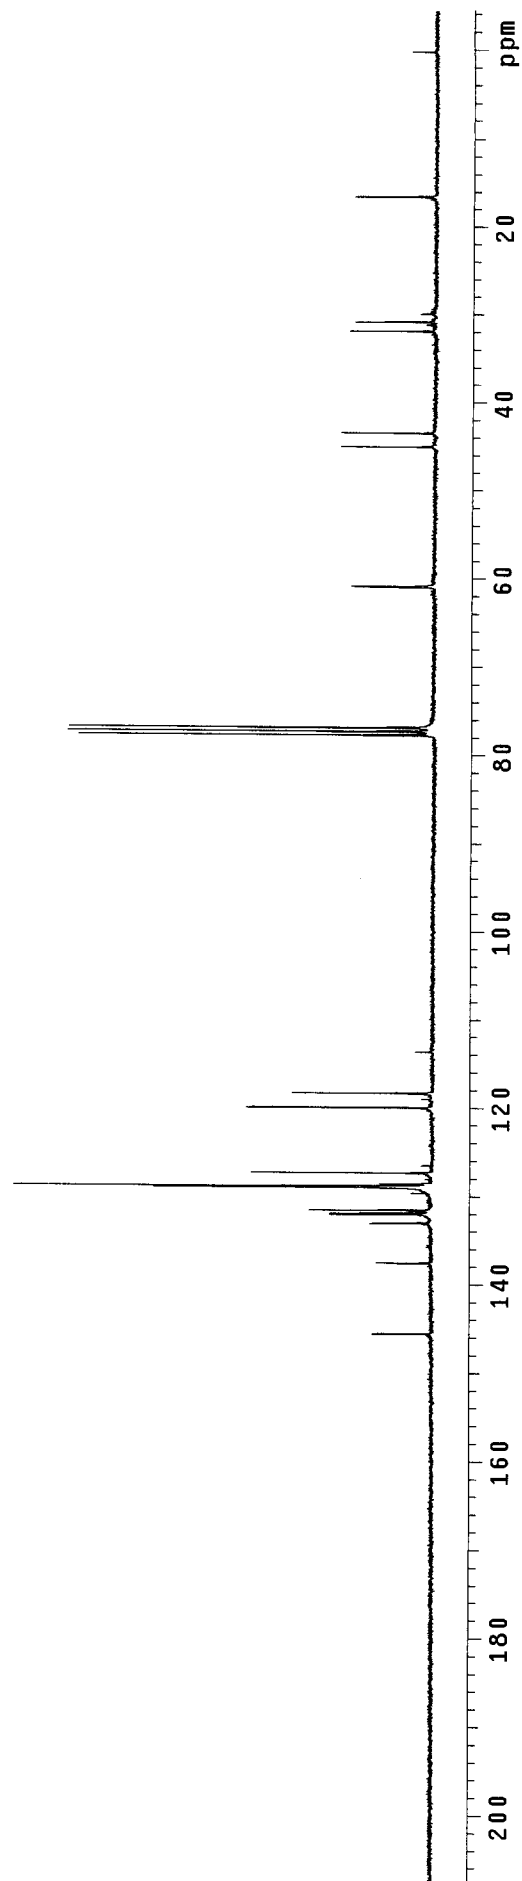

| INDEX | FREQUENCY PPM | HEIGHT |
|-------|---------------|--------|
| 1     | 6208.766      | 51.117 |
|       |               | 30.1   |

<sup>31</sup>P-NMR (<sup>1</sup>H decoupled)

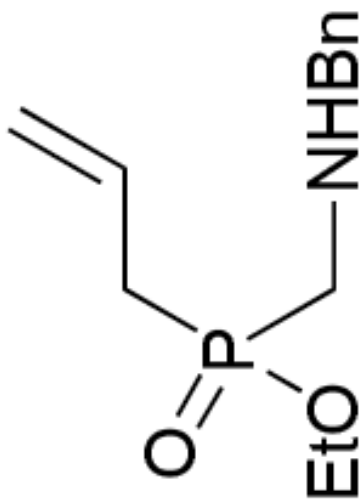

12a (Scheme 6)

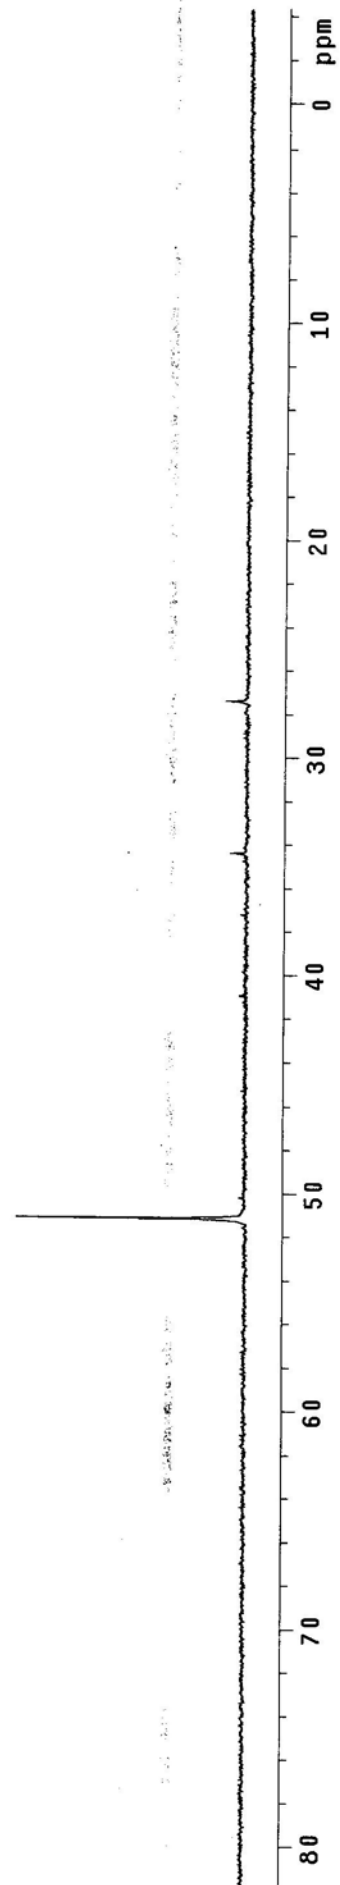



| INDEX | FREQUENCY PPM | HEIGHT |
|-------|---------------|--------|
| 1     | 6214.478      | 51.164 |
|       |               | 14.3   |

<sup>31</sup>P-NMR (<sup>1</sup>H coupled)

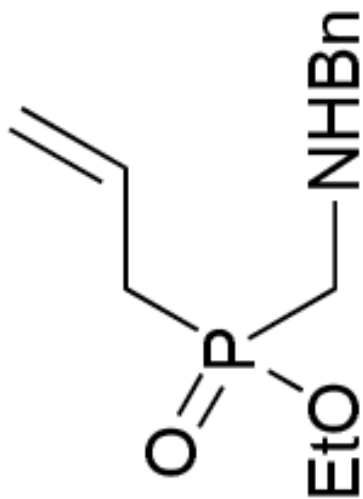

**12a (Scheme 6)**

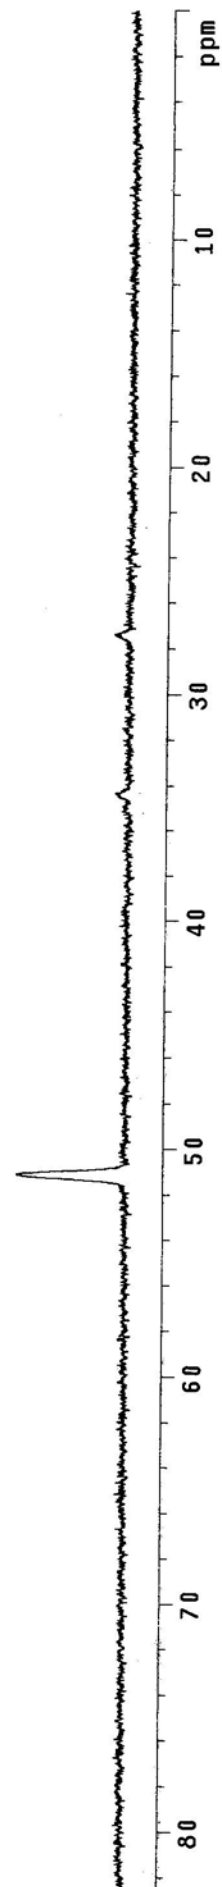

$^1\text{H-NMR}$

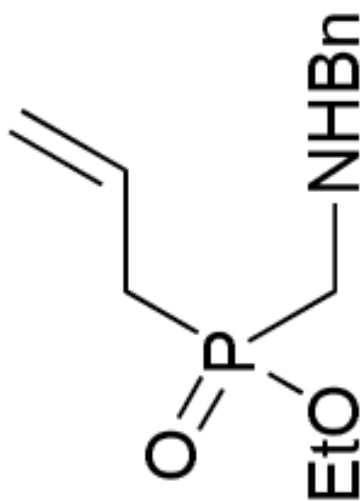

**12a (Scheme 6)**

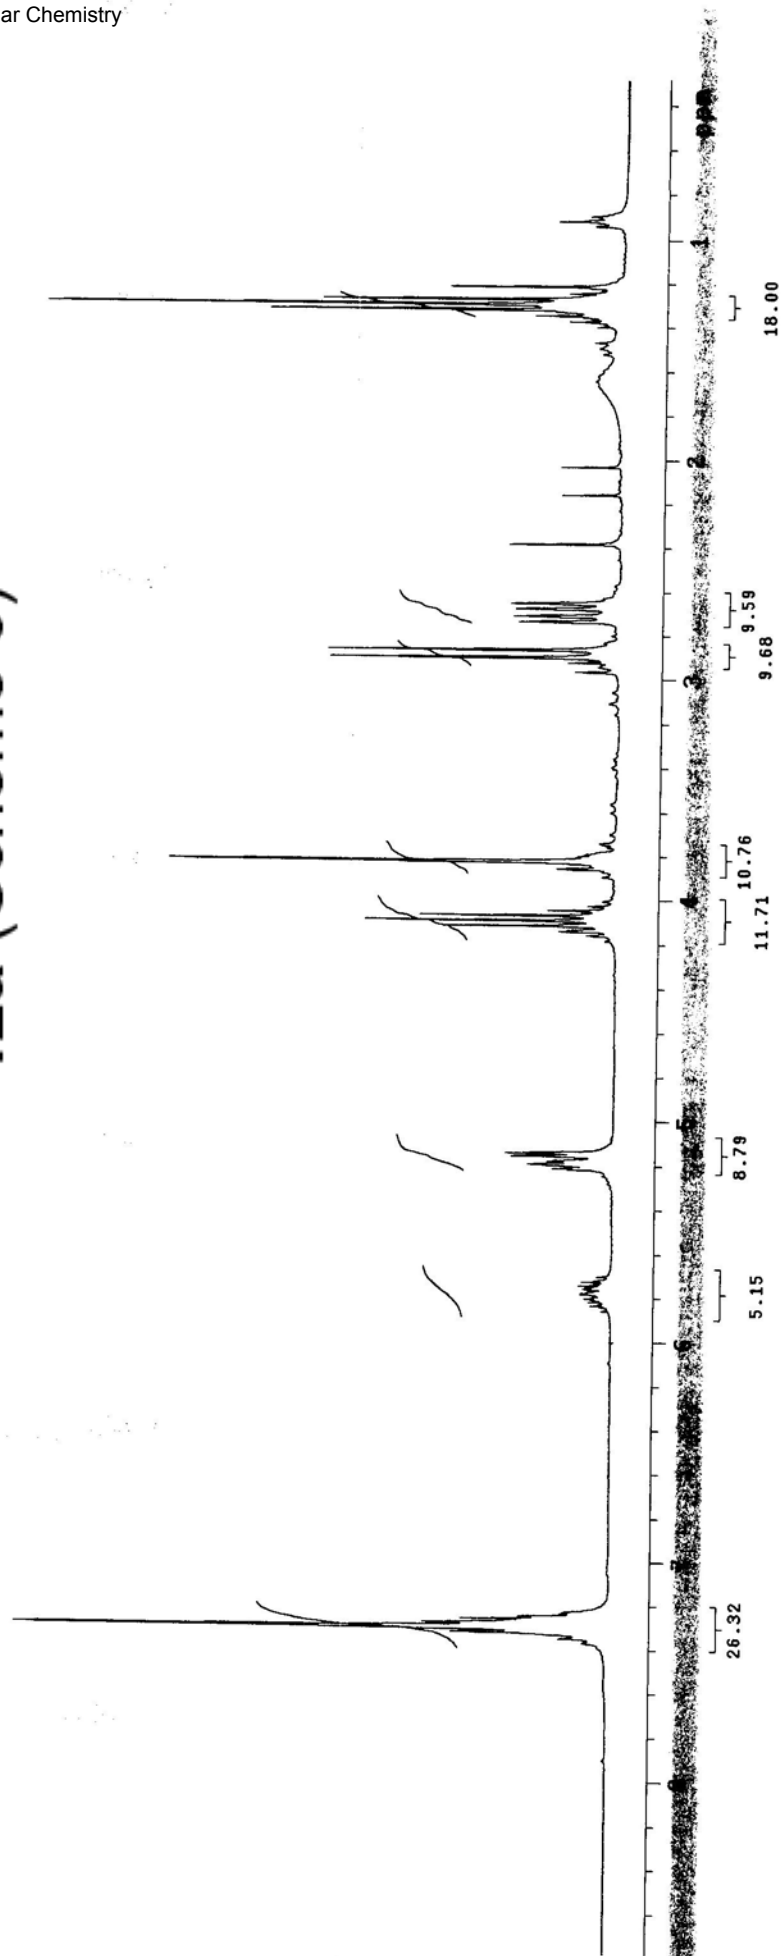

### <sup>13</sup>C-NMR

| INDEX | FREQUENCY | PPM     | HEIGHT |
|-------|-----------|---------|--------|
| 1     | 10524.172 | 139.489 | 10.3   |
| 2     | 9708.547  | 128.679 | 82.1   |
| 3     | 9693.288  | 128.477 | 74.1   |
| 4     | 9653.270  | 127.946 | 15.5   |
| 5     | 9644.057  | 127.824 | 12.6   |
| 6     | 9619.010  | 127.492 | 42.2   |
| 7     | 9089.846  | 120.478 | 15.8   |
| 8     | 9077.466  | 120.314 | 17.0   |
| 9     | 5863.332  | 77.714  | 36.9   |
| 10    | 5831.375  | 77.290  | 38.0   |
| 11    | 5799.130  | 76.863  | 38.9   |
| 12    | 4611.248  | 61.118  | 10.4   |
| 13    | 4604.626  | 61.031  | 10.3   |
| 14    | 4185.441  | 55.475  | 20.7   |
| 15    | 4169.031  | 55.257  | 22.3   |
| 16    | 3480.658  | 46.133  | 21.3   |
| 17    | 3374.710  | 44.729  | 20.0   |
| 18    | 2538.068  | 33.640  | 17.8   |
| 19    | 2450.258  | 32.476  | 17.9   |
| 20    | 1278.498  | 16.945  | 14.8   |
| 21    | 1272.740  | 16.869  | 13.4   |
| 22    | 1258.921  | 16.686  | 6.4    |

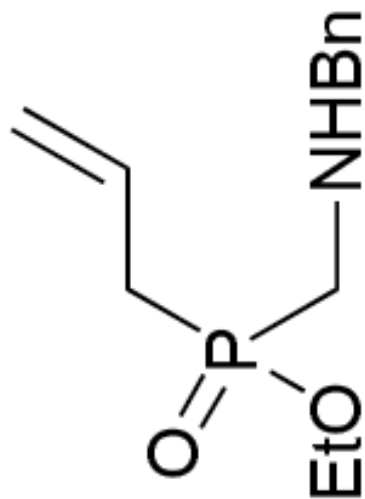

12a (Scheme 6)

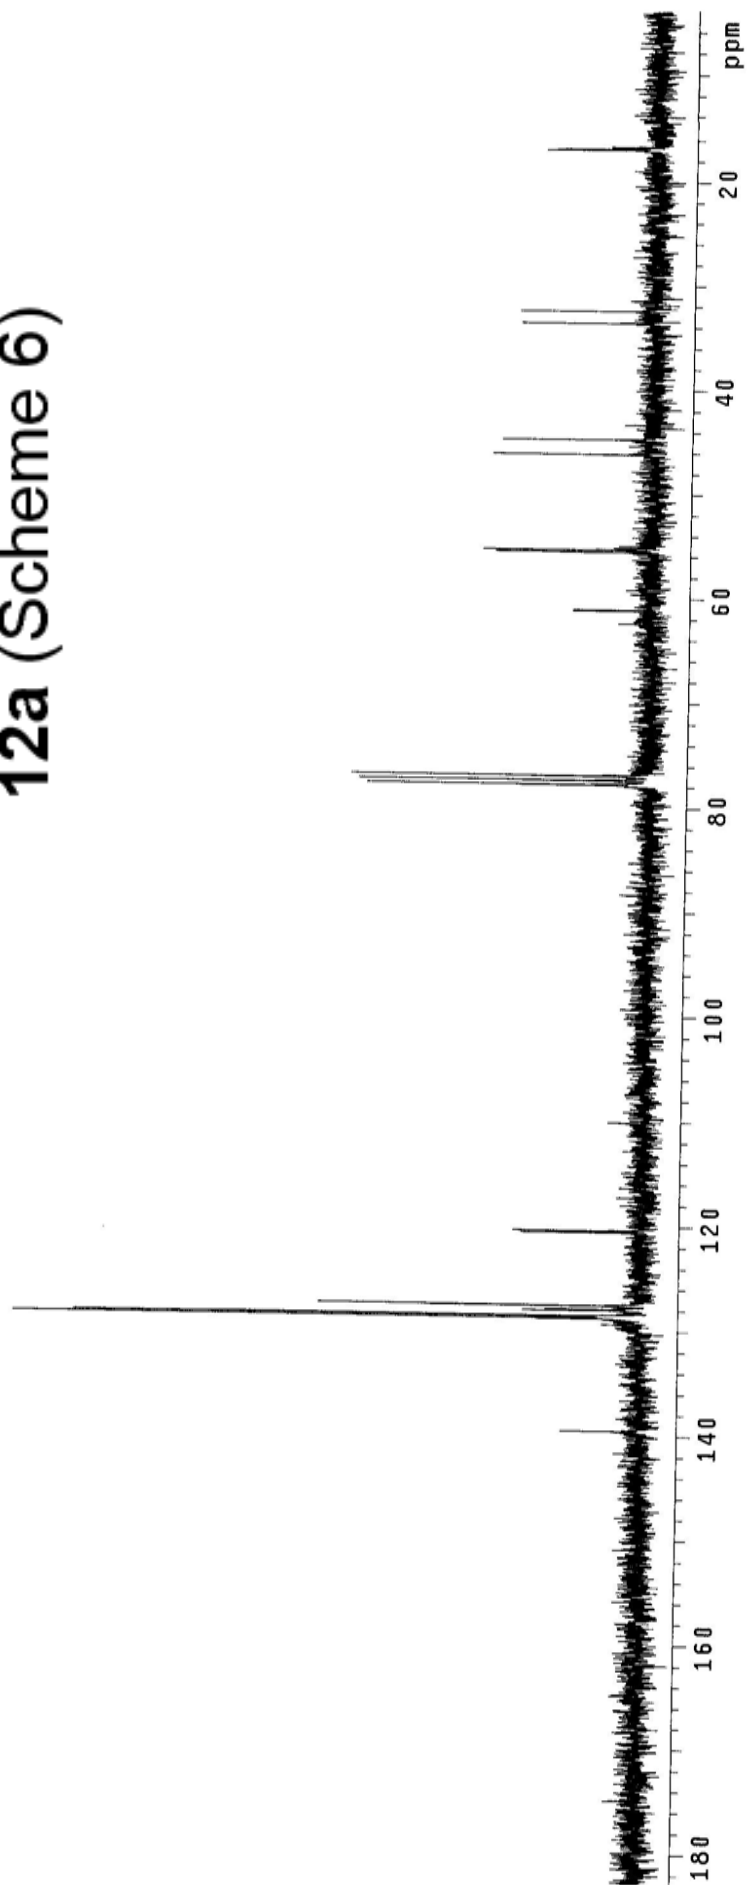

| INDEX | FREQUENCY PPM | HEIGHT |
|-------|---------------|--------|
| 1     | 6229.574      | 51.288 |
|       |               | 126.0  |

<sup>31</sup>P-NMR (<sup>1</sup>H decoupled)

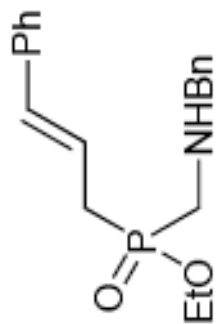

**12b** (Scheme 6)

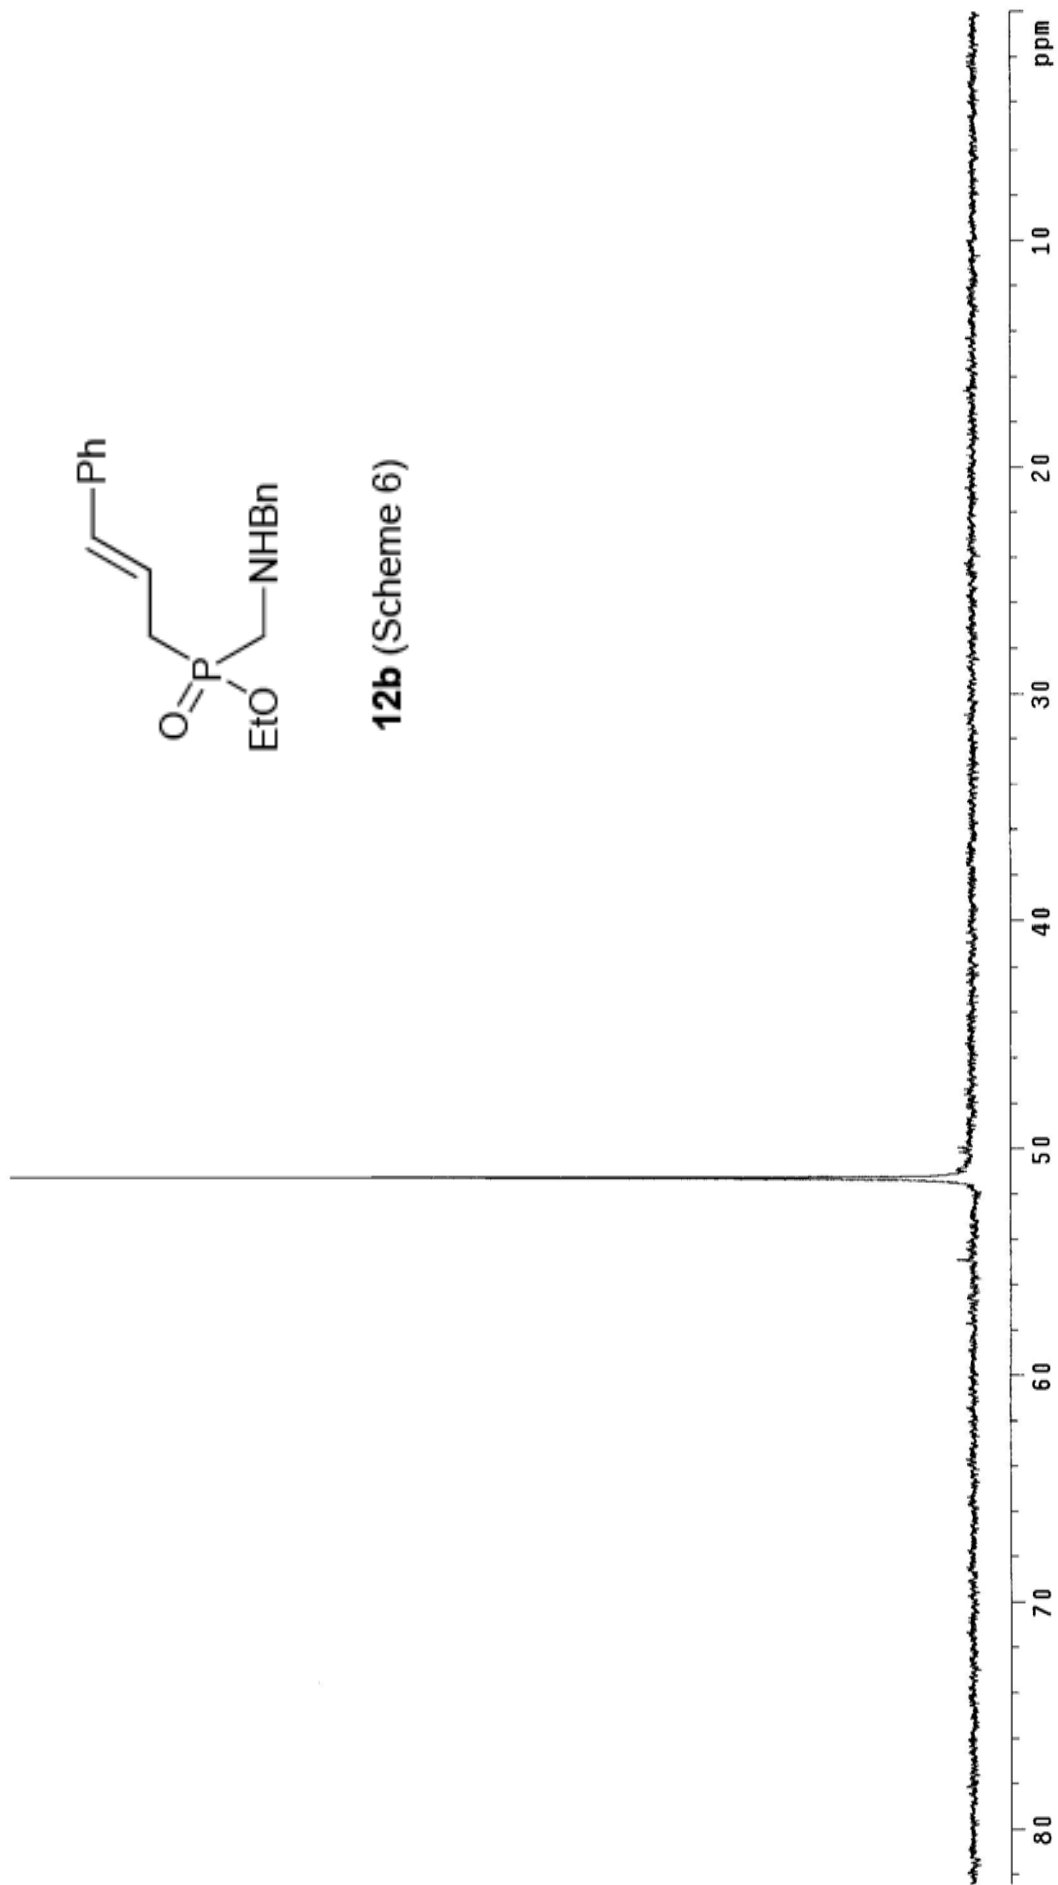

| INDEX | FREQUENCY PPM | HEIGHT |
|-------|---------------|--------|
| 1     | 6231.205      | 51.301 |
|       |               | 68.6   |

<sup>31</sup>P-NMR (<sup>1</sup>H coupled)

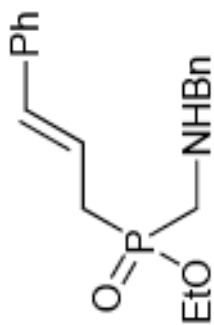

**12b** (Scheme 6)

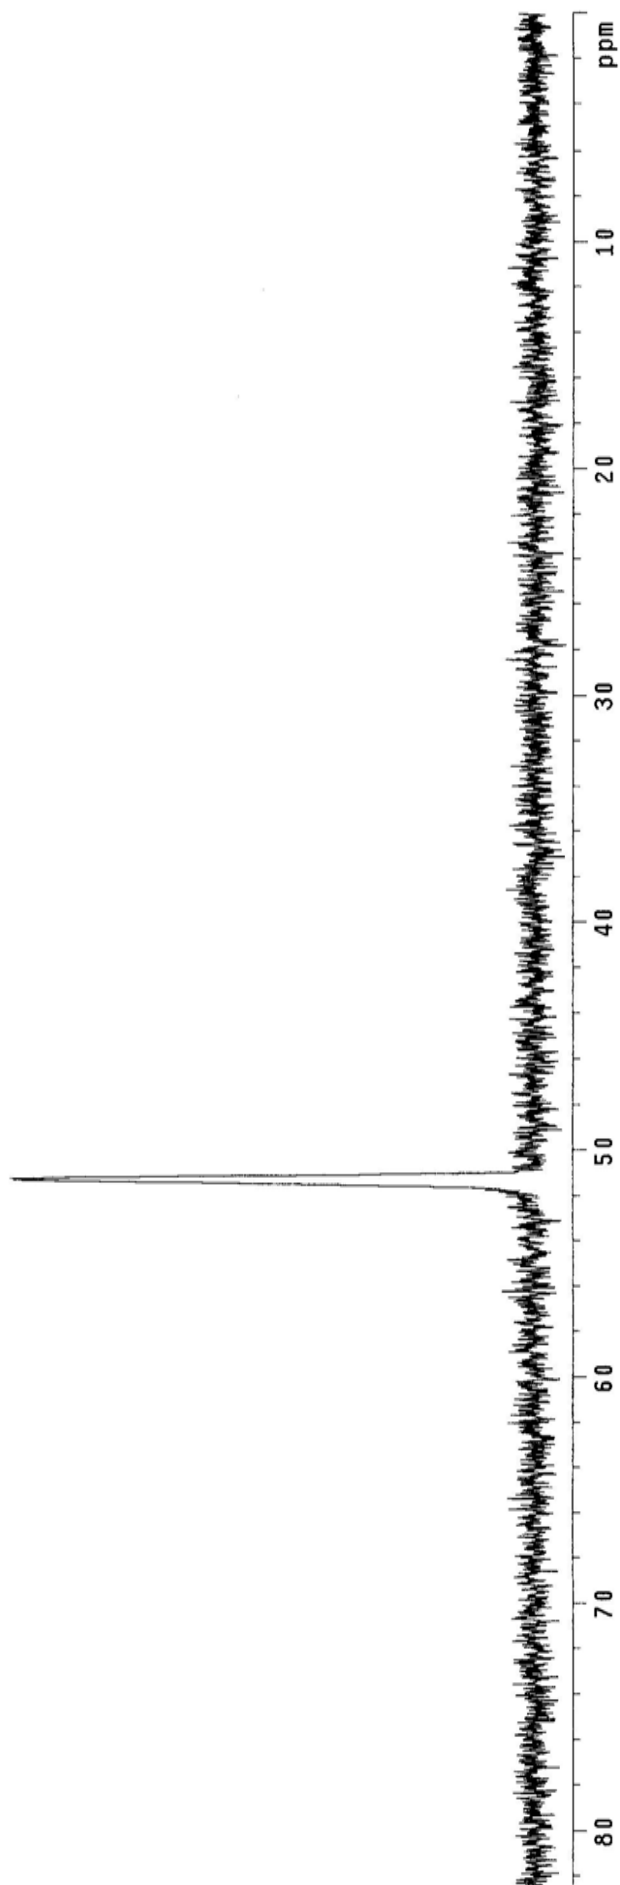

# <sup>1</sup>H-NMR

| INDEX | FREQUENCY PPM | HEIGHT |
|-------|---------------|--------|
| 1     | 2193.689      | 66.5   |
| 2     | 2190.464      | 104.5  |
| 3     | 2184.015      | 12.9   |
| 4     | 2180.790      | 13.5   |
| 5     | 2179.031      | 10.7   |
| 6     | 2177.566      | 10.1   |
| 7     | 2176.100      | 11.1   |
| 8     | 2172.875      | 11.2   |
| 9     | 2168.185      | 8.3    |
| 10    | 1243.862      | 16.0   |
| 11    | 1236.827      | 22.9   |
| 12    | 1229.205      | 15.0   |
| 13    | 1152.105      | 34.7   |
| 14    | 880.642       | 30.5   |
| 15    | 869.795       | 39.8   |
| 16    | 861.587       | 12.6   |
| 17    | 851.326       | 12.0   |
| 18    | 843.704       | 11.3   |
| 19    | 611.817       | 9.9    |
| 20    | 400.745       | 26.7   |
| 21    | 393.709       | 51.6   |
| 22    | 386.673       | 25.6   |

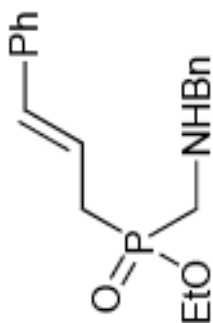

**12b** (Scheme 6)

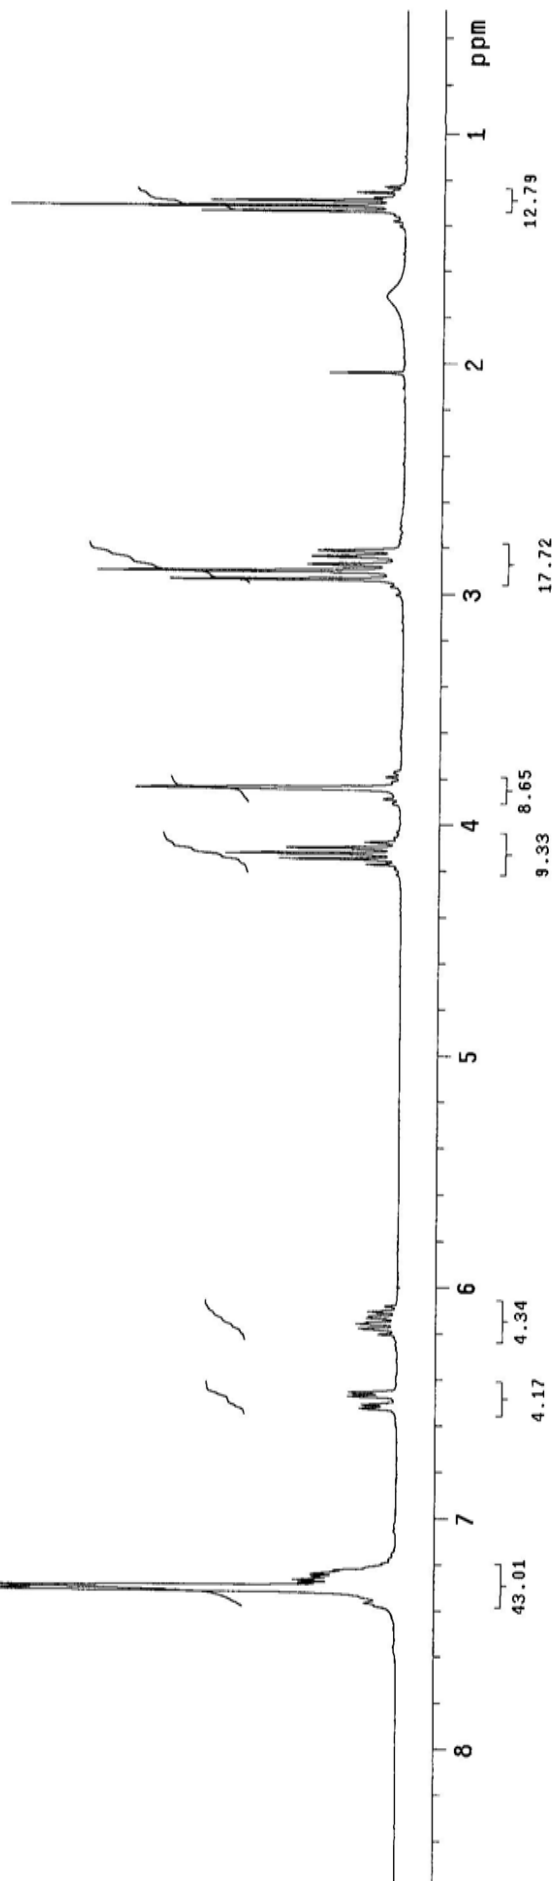

# <sup>13</sup>C-NMR

| INDEX | FREQUENCY | PPM     | HEIGHT |
|-------|-----------|---------|--------|
| 1     | 10525.900 | 139.512 | 21.4   |
| 2     | 10340.203 | 137.051 | 12.1   |
| 3     | 10336.748 | 137.005 | 11.3   |
| 4     | 10192.222 | 135.090 | 29.6   |
| 5     | 10179.266 | 134.918 | 29.3   |
| 6     | 9716.896  | 128.790 | 98.6   |
| 7     | 9710.850  | 128.709 | 125.4  |
| 8     | 9696.455  | 128.519 | 117.5  |
| 9     | 9645.209  | 127.839 | 43.3   |
| 10    | 9620.161  | 127.507 | 64.5   |
| 11    | 9541.276  | 126.462 | 73.1   |
| 12    | 9539.261  | 126.435 | 69.2   |
| 13    | 8998.869  | 119.273 | 28.3   |
| 14    | 8989.081  | 119.143 | 29.1   |
| 15    | 5865.347  | 77.740  | 46.1   |
| 16    | 5833.102  | 77.313  | 47.0   |
| 17    | 5801.145  | 76.889  | 47.2   |
| 18    | 4618.157  | 61.210  | 19.8   |
| 19    | 4611.248  | 61.118  | 19.3   |
| 20    | 4188.032  | 55.509  | 30.9   |
| 21    | 4171.334  | 55.288  | 30.9   |
| 22    | 3493.325  | 46.301  | 26.5   |
| 23    | 3387.090  | 44.893  | 26.2   |
| 24    | 2487.109  | 32.965  | 27.1   |
| 25    | 2399.011  | 31.797  | 27.0   |
| 26    | 1283.968  | 17.018  | 20.5   |
| 27    | 1278.498  | 16.945  | 24.2   |

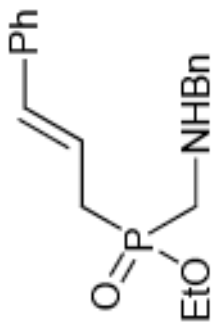

**12b** (Scheme 6)

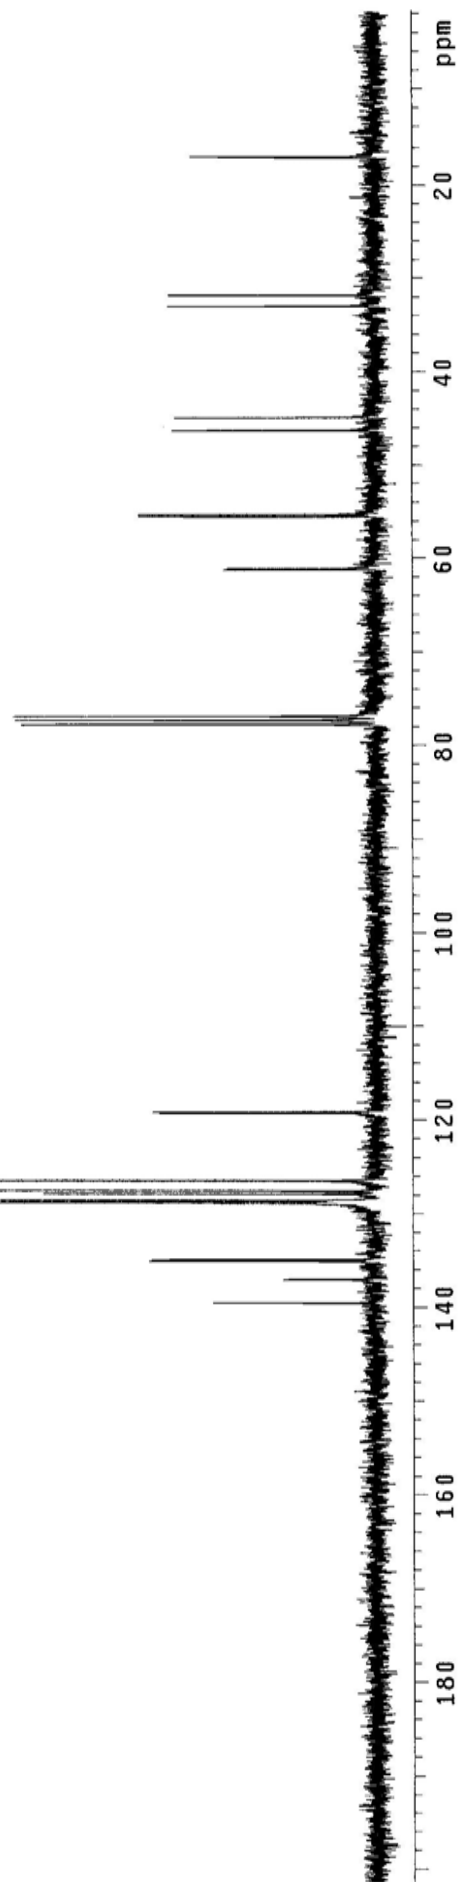

Supplement: b917428a.pdf [file b917428a.pdf]
